# Supplementary material for: Marine-Derived Penicillium purpurogenum Reduces Tumor Size and Ameliorates Inflammation in an Erlich Mice Model
Source: PubMed Central journal article supplement (PMC7694122; doi:10.3390/md18110541), 2020-10-29
Supplement: marinedrugs-18-00541-s001.pdf [file marinedrugs-18-00541-s001.pdf]

## Supplementary data content page

**Title:** Kurilosides A<sub>1</sub>, A<sub>2</sub>, C<sub>1</sub>, D, E and F – triterpene glycosides from the Far Eastern sea cucumber *Thyonidium* (= *Duasmmodactyla*) *kurilensis* (Levin): structures with unusual non-holostane aglycones and cytotoxicities.

**Authors:** Alexandra S. Silchenko, Anatoly I. Kalinovsky, Sergey A. Avilov, Pelageya V. Andrijaschenko, Roman S. Popov, Ekaterina A. Chingizova, Vladimir I. Kalinin\*

**Address:** G.B. Elyakov Pacific Institute of Bioorganic Chemistry, Far Eastern Branch of Russian Academy of Sciences, Pr. 100-let Vladivostoku 159, 690022 Vladivostok, Russia

**Correspondence:** kalininv@piboc.dvo.ru; Tel.: +7-914-705-0845

### Contents:

Figure S1. The <sup>13</sup>C NMR (176.03 MHz) spectrum of kuriloside A<sub>1</sub> (**1**) in C<sub>5</sub>D<sub>5</sub>N/D<sub>2</sub>O (4/1)

Figure S2. The <sup>1</sup>H NMR (700.00 MHz) spectrum of kuriloside A<sub>1</sub> (**1**) in C<sub>5</sub>D<sub>5</sub>N/D<sub>2</sub>O (4/1)

Figure S3. The COSY (700.00 MHz) spectrum of the aglycone part of kuriloside A<sub>1</sub> (**1**) in C<sub>5</sub>D<sub>5</sub>N/D<sub>2</sub>O (4/1)

Figure S4. The HSQC (700.00 MHz) spectrum of the aglycone part of kuriloside A<sub>1</sub> (**1**) in C<sub>5</sub>D<sub>5</sub>N/D<sub>2</sub>O (4/1)

Figure S5. The ROESY (700.00 MHz) spectrum of the aglycone part of kuriloside A<sub>1</sub> (**1**) in C<sub>5</sub>D<sub>5</sub>N/D<sub>2</sub>O (4/1)

Figure S6. The HMBC (700.00 MHz) spectrum of the aglycone part of kuriloside A<sub>1</sub> (**1**) in C<sub>5</sub>D<sub>5</sub>N/D<sub>2</sub>O (4/1)

Figure S7. HR-ESI-MS and ESI-MS/MS spectra of kuriloside A<sub>1</sub> (**1**)

Figure S8. The <sup>13</sup>C NMR (176.03 MHz) spectrum of kuriloside A<sub>2</sub> (**2**) in C<sub>5</sub>D<sub>5</sub>N/D<sub>2</sub>O (4/1)

Figure S9. The <sup>1</sup>H NMR (700.00 MHz) spectrum of kuriloside A<sub>2</sub> (**2**) in C<sub>5</sub>D<sub>5</sub>N/D<sub>2</sub>O (4/1)

Figure S10. The COSY (700.00 MHz) spectrum of the aglycone part of kuriloside A<sub>2</sub> (**2**) in C<sub>5</sub>D<sub>5</sub>N/D<sub>2</sub>O (4/1)

Figure S11. The HSQC (700.00 MHz) spectrum of the aglycone part of kuriloside A<sub>2</sub> (**2**) in C<sub>5</sub>D<sub>5</sub>N/D<sub>2</sub>O (4/1)

Figure S12. The HMBC (700.00 MHz) spectrum of the aglycone part of kuriloside A<sub>2</sub> (**2**) in C<sub>5</sub>D<sub>5</sub>N/D<sub>2</sub>O (4/1)

Figure S13. The ROESY (700.00 MHz) spectrum of the aglycone part of kuriloside A<sub>2</sub> (**2**) in C<sub>5</sub>D<sub>5</sub>N/D<sub>2</sub>O (4/1)

Figure S14. HR-ESI-MS and ESI-MS/MS spectra of kuriloside A<sub>2</sub> (**2**)

Figure S15. The <sup>13</sup>C NMR (176.03 MHz) spectrum of kuriloside C<sub>1</sub> (**3**) in C<sub>5</sub>D<sub>5</sub>N/D<sub>2</sub>O (4/1)

Figure S16. The <sup>1</sup>H NMR (700.00 MHz) spectrum of kuriloside C<sub>1</sub> (**3**) in C<sub>5</sub>D<sub>5</sub>N/D<sub>2</sub>O (4/1)

Figure S17. The COSY (700.00 MHz) spectrum of the carbohydrate part of kuriloside C<sub>1</sub> (**3**) in C<sub>5</sub>D<sub>5</sub>N/D<sub>2</sub>O (4/1)

Figure S18. The HSQC (700.00 MHz) spectrum of the carbohydrate part of kuriloside C<sub>1</sub> (**3**) in C<sub>5</sub>D<sub>5</sub>N/D<sub>2</sub>O (4/1)

Figure S19. The HMBC (700.00 MHz) spectrum of the carbohydrate part of kuriloside C<sub>1</sub> (**3**) in C<sub>5</sub>D<sub>5</sub>N/D<sub>2</sub>O (4/1)

Figure S20. The ROESY (700.00 MHz) spectrum of the carbohydrate part of kuriloside C<sub>1</sub> (**3**) in C<sub>5</sub>D<sub>5</sub>N/D<sub>2</sub>O (4/1)

Figure S21. 1 D TOCSY (700.00 MHz) spectra of the carbohydrate part of kuriloside C<sub>1</sub> (**3**) in C<sub>5</sub>D<sub>5</sub>N/D<sub>2</sub>O (4/1)

Figure S22. HR-ESI-MS and ESI-MS/MS spectra of kuriloside C<sub>1</sub> (**3**)

Figure S23. The <sup>13</sup>C NMR (176.03 MHz) spectrum of kuriloside D (**4**) in C<sub>5</sub>D<sub>5</sub>N/D<sub>2</sub>O (4/1)

Figure S24. The <sup>1</sup>H NMR (700.00 MHz) spectrum of kuriloside D (**4**) in C<sub>5</sub>D<sub>5</sub>N/D<sub>2</sub>O (4/1)

Figure S25. The COSY (700.00 MHz) spectrum of kuriloside D (**4**) in C<sub>5</sub>D<sub>5</sub>N/D<sub>2</sub>O (4/1)

Figure S26. The HSQC (700.00 MHz) spectrum of kuriloside D (**4**) in C<sub>5</sub>D<sub>5</sub>N/D<sub>2</sub>O (4/1)

Figure S27. The ROESY (700.00 MHz) spectrum of kuriloside D (**4**) in C<sub>5</sub>D<sub>5</sub>N/D<sub>2</sub>O (4/1)

Figure S28. The HMBC (700.00 MHz) spectrum of kuriloside D (**4**) in C<sub>5</sub>D<sub>5</sub>N/D<sub>2</sub>O (4/1)

Figure S29. 1 D TOCSY (700.00 MHz) spectra of kuriloside D (**4**) in C<sub>5</sub>D<sub>5</sub>N/D<sub>2</sub>O (4/1)

Figure S30. 1D TOCSY (700.00 MHz) spectra of kuriloside D (**4**) in C<sub>5</sub>D<sub>5</sub>N/D<sub>2</sub>O (4/1)

Figure S31. HR-ESI-MS and ESI-MS/MS spectra of kuriloside D (**4**)

Figure S32. The <sup>13</sup>C NMR (176.03 MHz) spectrum of kuriloside E (**5**) in C<sub>5</sub>D<sub>5</sub>N/D<sub>2</sub>O (4/1)

Figure S33. The <sup>1</sup>H NMR (700.00 MHz) spectrum of kuriloside E (**5**) in C<sub>5</sub>D<sub>5</sub>N/D<sub>2</sub>O (4/1)

Figure S34. The COSY (700.00 MHz) spectrum of kuriloside E (**5**) in C<sub>5</sub>D<sub>5</sub>N/D<sub>2</sub>O (4/1)

Figure S35. The HSQC (700.00 MHz) spectrum of kuriloside E (**5**) in C<sub>5</sub>D<sub>5</sub>N/D<sub>2</sub>O (4/1)

Figure S36. The HMBC (700.00 MHz) spectrum of kuriloside E (**5**) in C<sub>5</sub>D<sub>5</sub>N/D<sub>2</sub>O (4/1)

Figure S37. The ROESY (700.00 MHz) spectrum of kuriloside E (**5**) in C<sub>5</sub>D<sub>5</sub>N/D<sub>2</sub>O (4/1)

Figure S38. 1D TOCSY (700.00 MHz) spectra of kuriloside E (**5**) in C<sub>5</sub>D<sub>5</sub>N/D<sub>2</sub>O (4/1)

Figure S39. 1D TOCSY (700.00 MHz) spectra of kuriloside E (**5**) in C<sub>5</sub>D<sub>5</sub>N/D<sub>2</sub>O (4/1)

Figure S40. HR-ESI-MS and ESI-MS/MS spectra of kuriloside E (**5**)

Figure S41. The <sup>13</sup>C NMR (176.03 MHz) spectrum of kuriloside F (**6**) in C<sub>5</sub>D<sub>5</sub>N/D<sub>2</sub>O (4/1)

Figure S42. The <sup>1</sup>H NMR (700.00 MHz) spectrum of kuriloside F (**6**) in C<sub>5</sub>D<sub>5</sub>N/D<sub>2</sub>O (4/1)

Figure S43. The COSY (700.00 MHz) spectrum of kuriloside F (**6**) in C<sub>5</sub>D<sub>5</sub>N/D<sub>2</sub>O (4/1)

Figure S44. The HSQC (700.00 MHz) spectrum of kuriloside F (**6**) in C<sub>5</sub>D<sub>5</sub>N/D<sub>2</sub>O (4/1)

Figure S45. The ROESY (700.00 MHz) spectrum of kuriloside F (**6**) in C<sub>5</sub>D<sub>5</sub>N/D<sub>2</sub>O (4/1)

Figure S46. The HMBC (700.00 MHz) spectrum of kuriloside F (**6**) in C<sub>5</sub>D<sub>5</sub>N/D<sub>2</sub>O (4/1)

Figure S47. 1D TOCSY (700.00 MHz) spectra of the carbohydrate part of kuriloside F (**6**) in C<sub>5</sub>D<sub>5</sub>N/D<sub>2</sub>O (4/1)

Figure S48. 1D TOCSY (700.00 MHz) spectra of the carbohydrate part of kuriloside F (**6**) in C<sub>5</sub>D<sub>5</sub>N/D<sub>2</sub>O (4/1)

Figure S49. HR-ESI-MS and ESI-MS/MS spectra of kuriloside F (**6**)

Figure S50. The <sup>13</sup>C NMR (176.03 MHz) spectrum of kuriloside A (**7**) in C<sub>5</sub>D<sub>5</sub>N/D<sub>2</sub>O (4/1)

Figure S51. The <sup>1</sup>H NMR (700.00 MHz) spectrum of kuriloside A (**7**) in C<sub>5</sub>D<sub>5</sub>N/D<sub>2</sub>O (4/1)

Figure S52. The COSY (700.00 MHz) spectrum of kuriloside A (**7**) in C<sub>5</sub>D<sub>5</sub>N/D<sub>2</sub>O (4/1)

Figure S53. The HSQC (700.00 MHz) spectrum of kuriloside A (**7**) in C<sub>5</sub>D<sub>5</sub>N/D<sub>2</sub>O (4/1)

Figure S54. The HMBC (700.00 MHz) spectrum of kuriloside A (**7**) in C<sub>5</sub>D<sub>5</sub>N/D<sub>2</sub>O (4/1)

Figure S55. The ROESY (700.00 MHz) spectrum of kuriloside A (**7**) in C<sub>5</sub>D<sub>5</sub>N/D<sub>2</sub>O (4/1)

Figure S56. 1 D TOCSY (700.00 MHz) spectra of kuriloside A (**7**) in C<sub>5</sub>D<sub>5</sub>N/D<sub>2</sub>O (4/1)

Figure S57. 1 D TOCSY (700.00 MHz) spectra of kuriloside A (**7**) in C<sub>5</sub>D<sub>5</sub>N/D<sub>2</sub>O (4/1)

Figure S58. HR-ESI-MS and ESI-MS/MS spectra of kuriloside A (**7**)

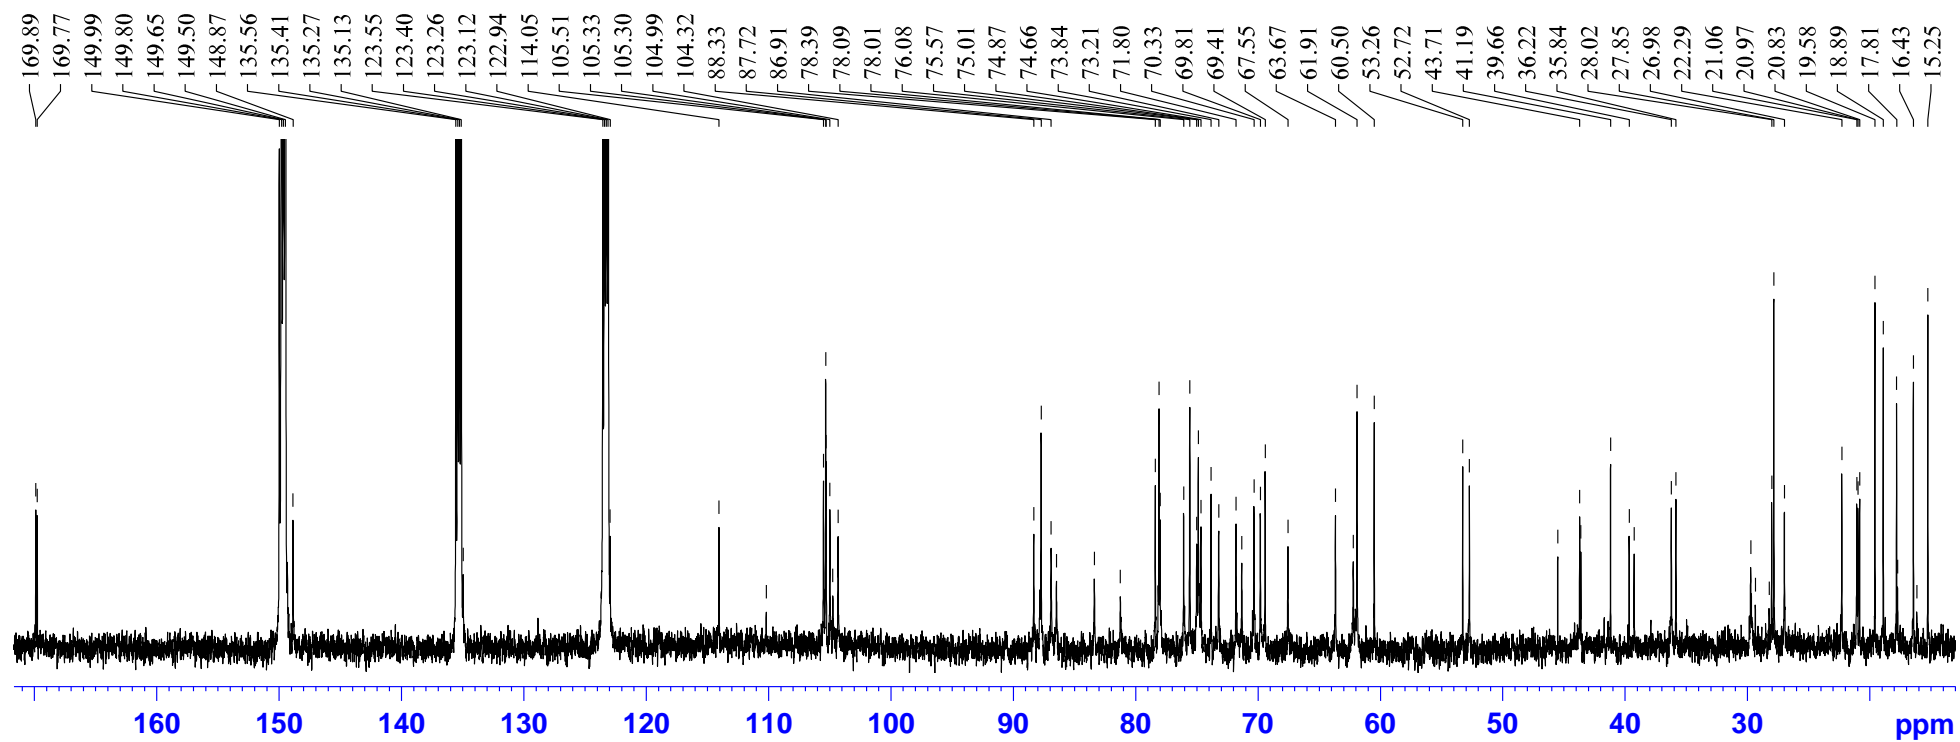

Figure S1. The  $^{13}\text{C}$  NMR (176.03 MHz) spectrum of kuriloside  $\text{A}_1$  (**1**) in  $\text{C}_5\text{D}_5\text{N}/\text{D}_2\text{O}$  (4/1)

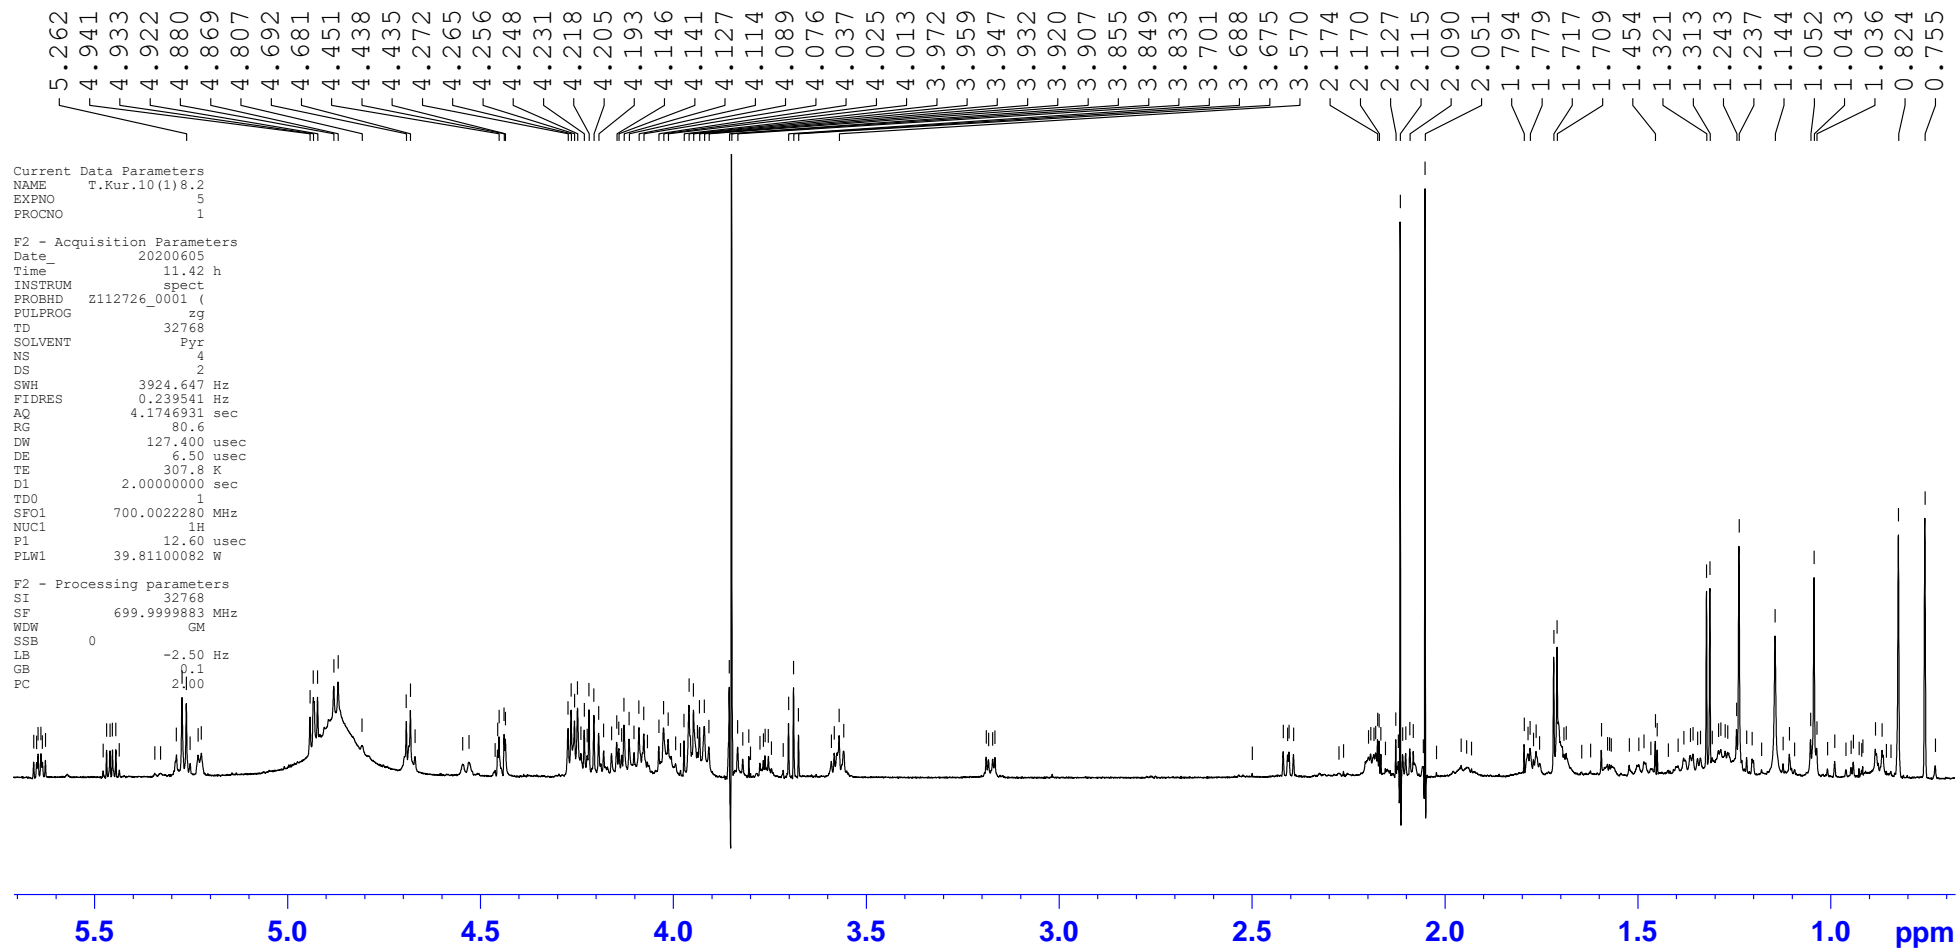

Figure S2. The  $^1\text{H}$  NMR (700.00 MHz) spectrum of kuriloside A<sub>1</sub> (**1**) in  $\text{C}_5\text{D}_5\text{N}/\text{D}_2\text{O}$  (4/1)

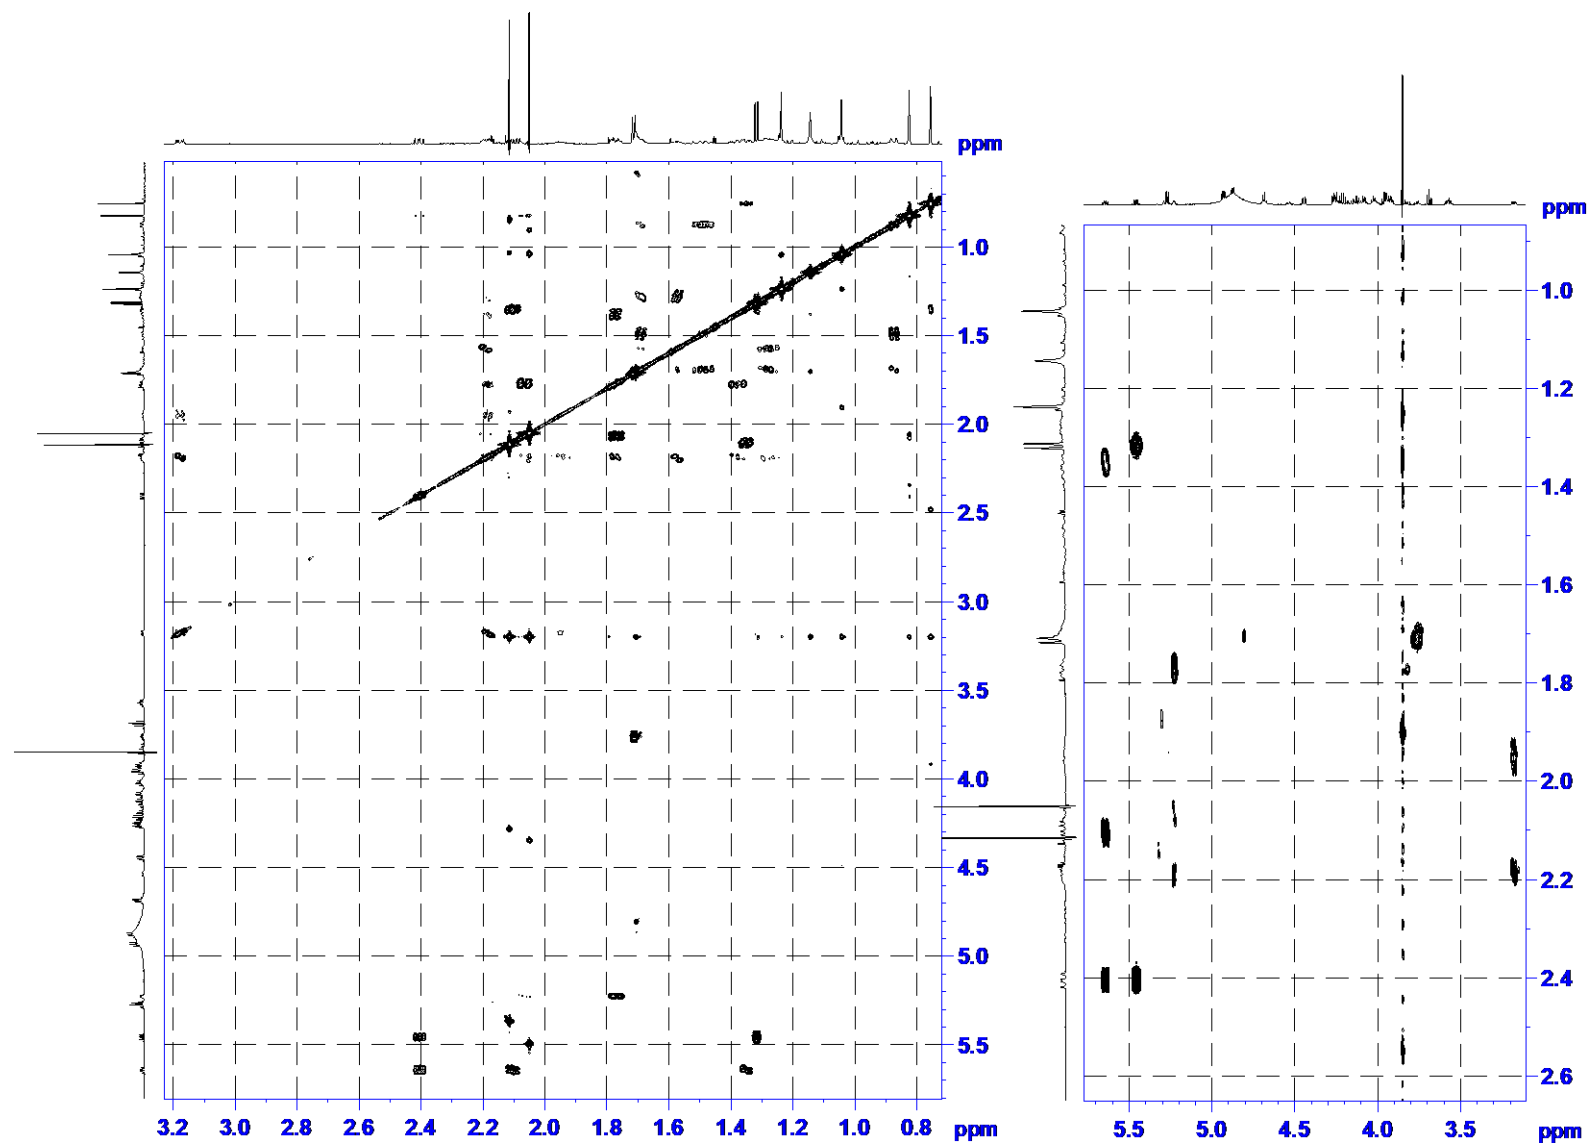

Figure S3. The COSY (700.00 MHz) spectrum of the aglycone part of kuriloside A<sub>1</sub> (**1**) in C<sub>5</sub>D<sub>5</sub>N/D<sub>2</sub>O (4/1)

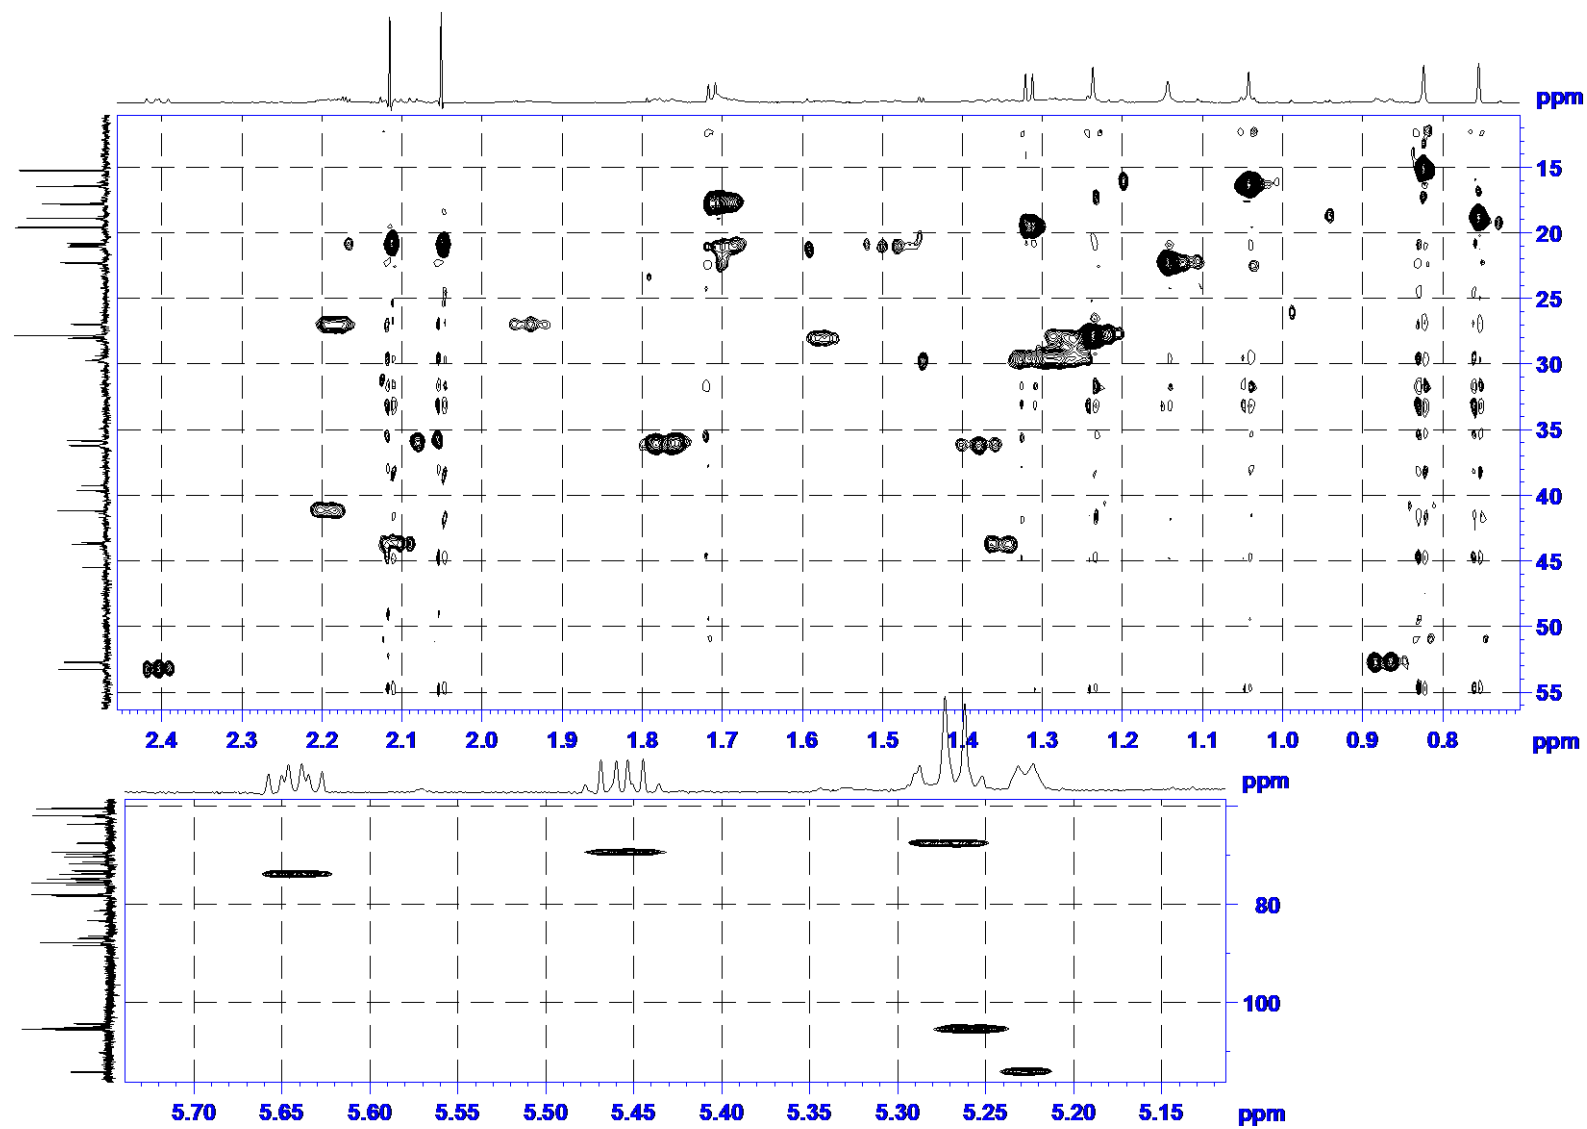

Figure S4. The HSQC (700.00 MHz) spectrum of the aglycone part of kuriloside A<sub>1</sub> (**1**) in C<sub>5</sub>D<sub>5</sub>N/D<sub>2</sub>O (4/1)



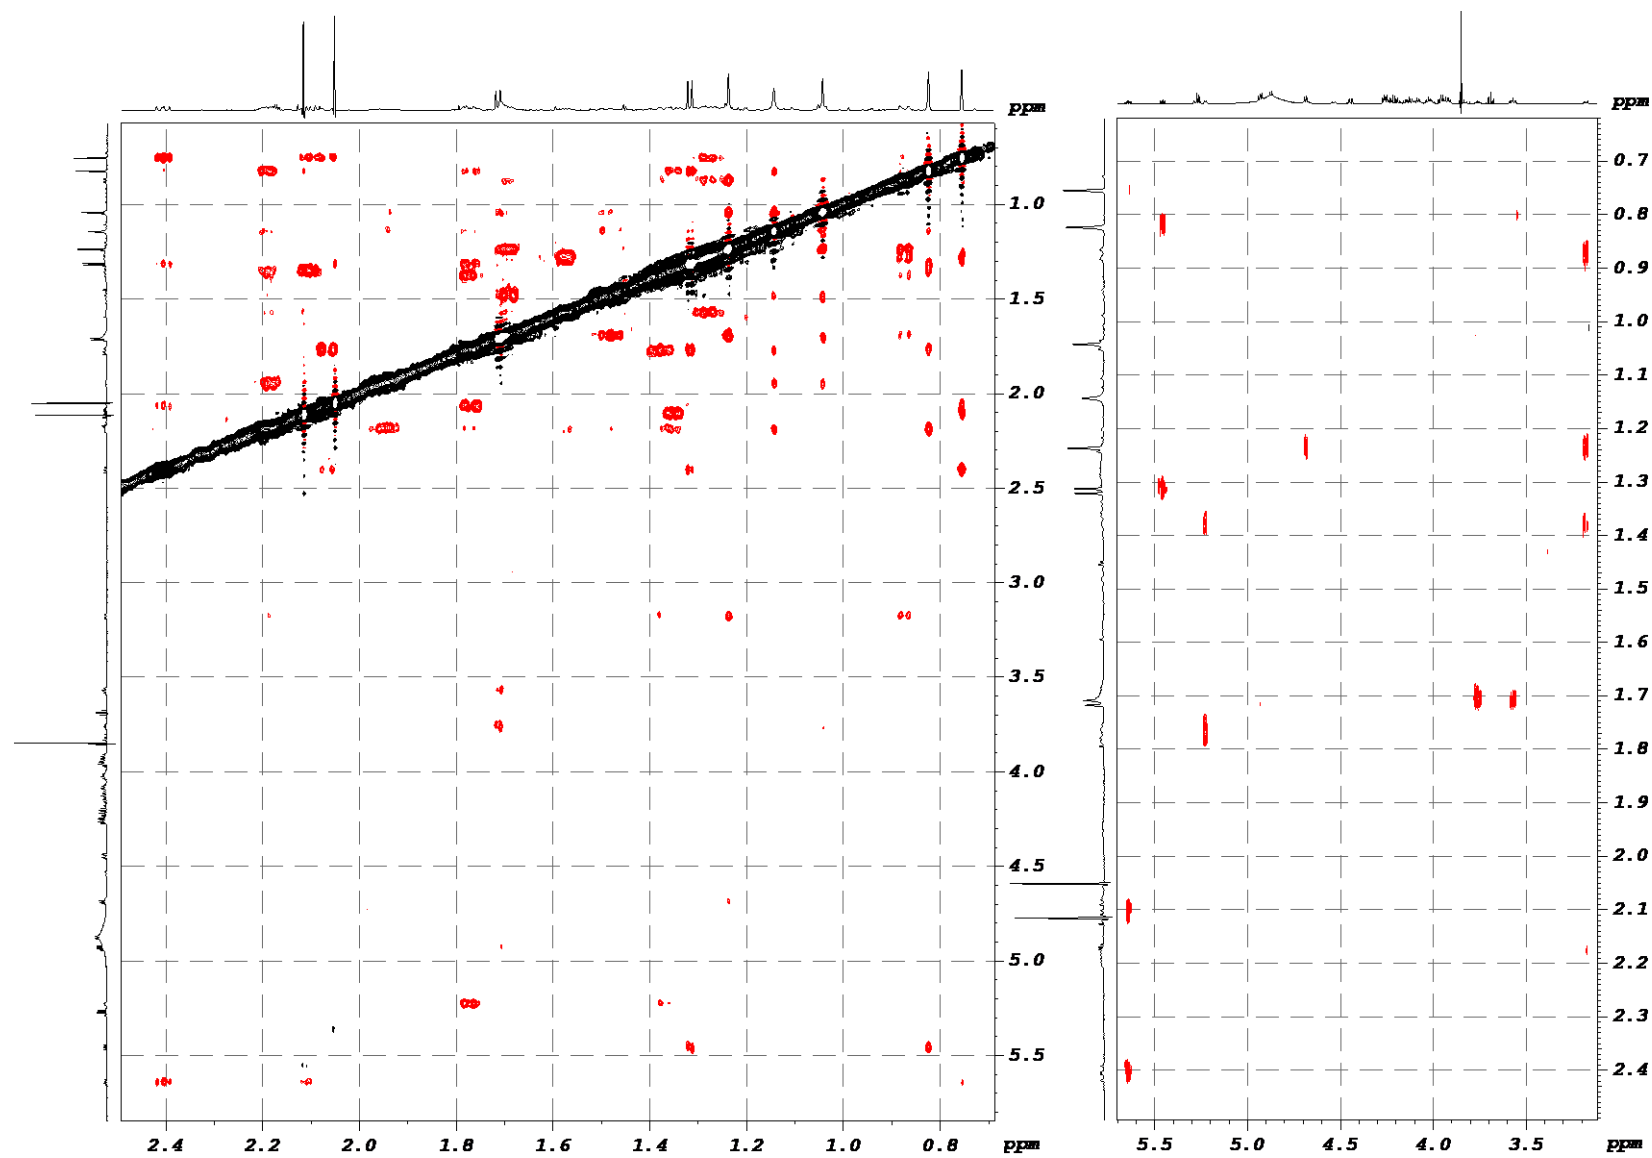

Figure S5. The ROESY (700.00 MHz) spectrum of the aglycone part of kuriloside A<sub>1</sub> (1) in C<sub>5</sub>D<sub>5</sub>N/D<sub>2</sub>O (4/1)

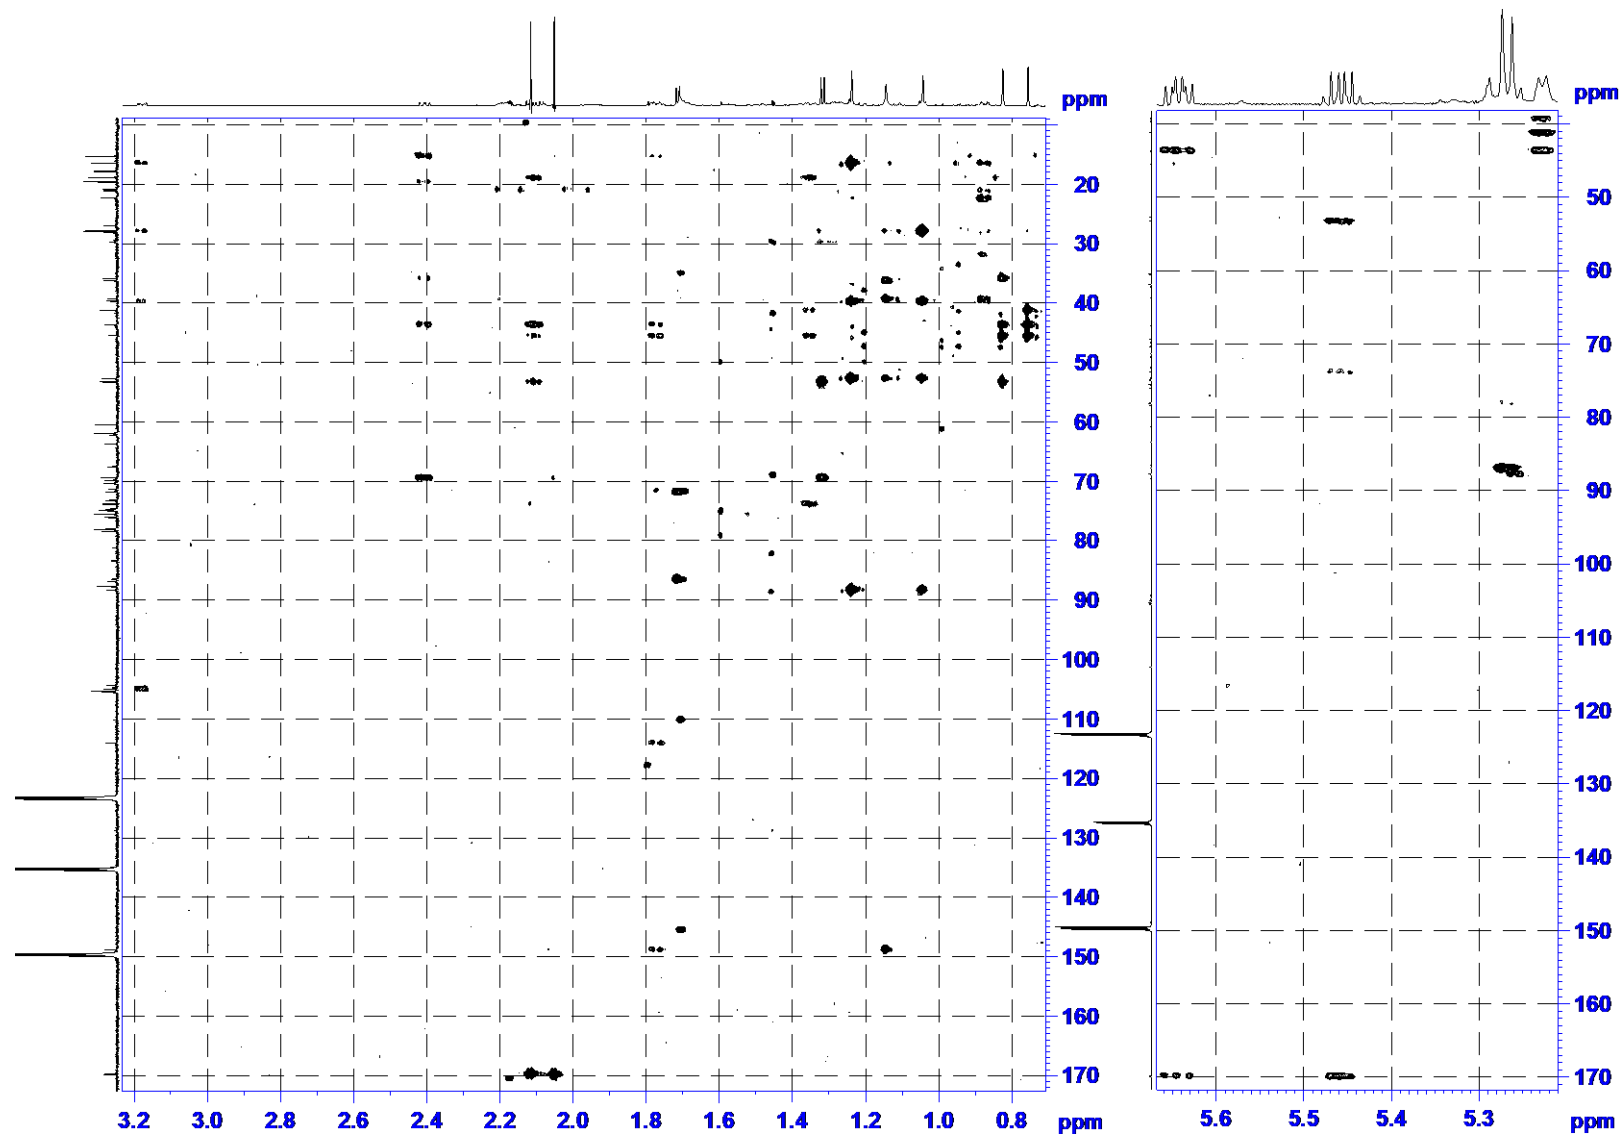

Figure S6. The HMBC (700.00 MHz) spectrum of the aglycone part of kuriloside A<sub>1</sub> (**1**) in C<sub>5</sub>D<sub>5</sub>N/D<sub>2</sub>O (4/1)

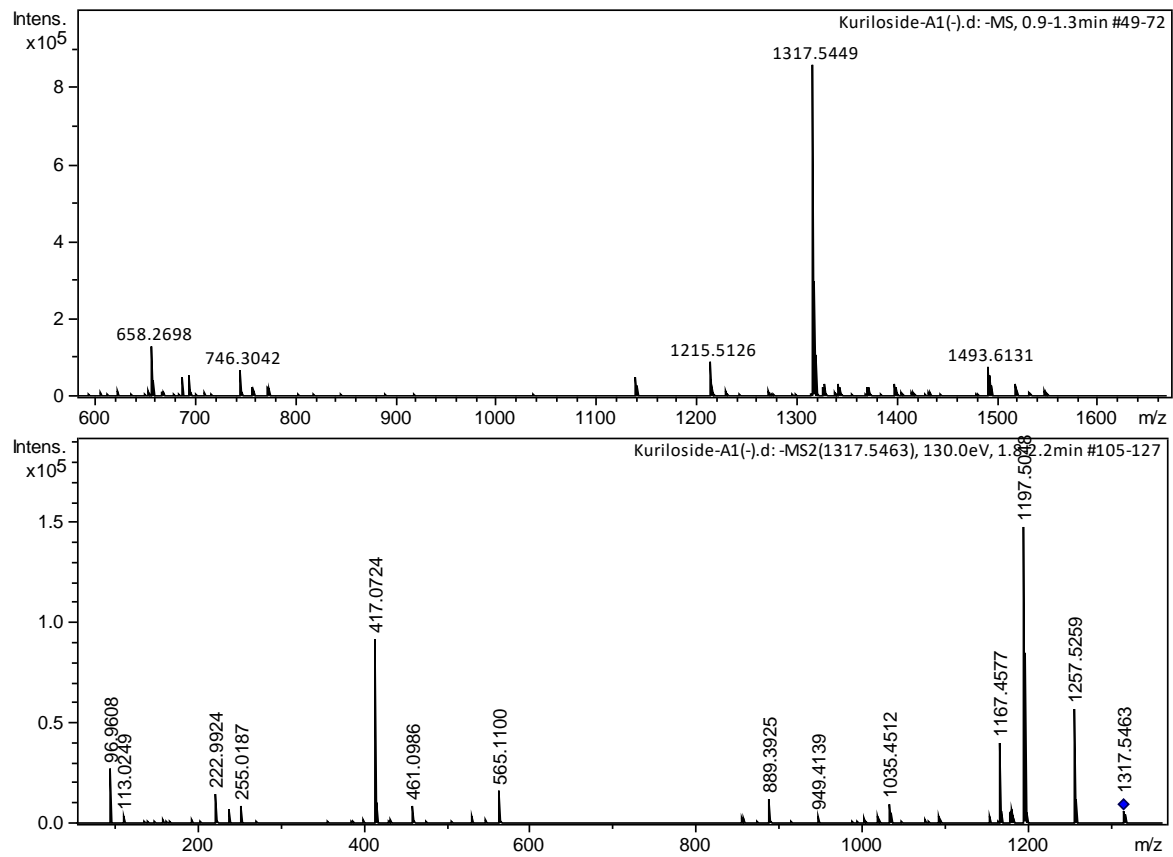

Figure S7. HR-ESI-MS and ESI-MS/MS spectra of kuriloside A<sub>1</sub> (**1**)

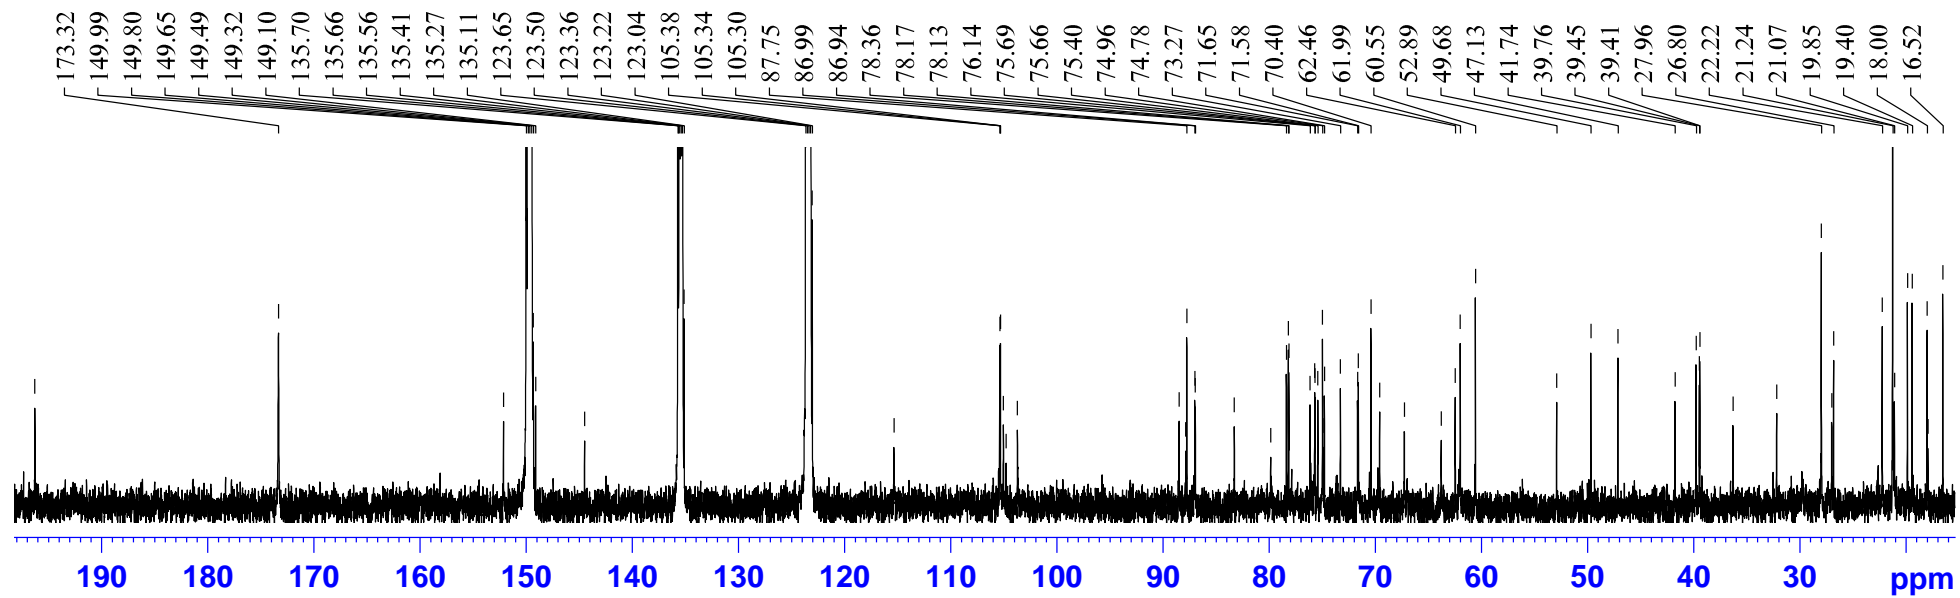

Figure S8. The  $^{13}\text{C}$  NMR (176.03 MHz) spectrum of kuriloside  $\text{A}_2$  (**2**) in  $\text{C}_5\text{D}_5\text{N}/\text{D}_2\text{O}$  (4/1)

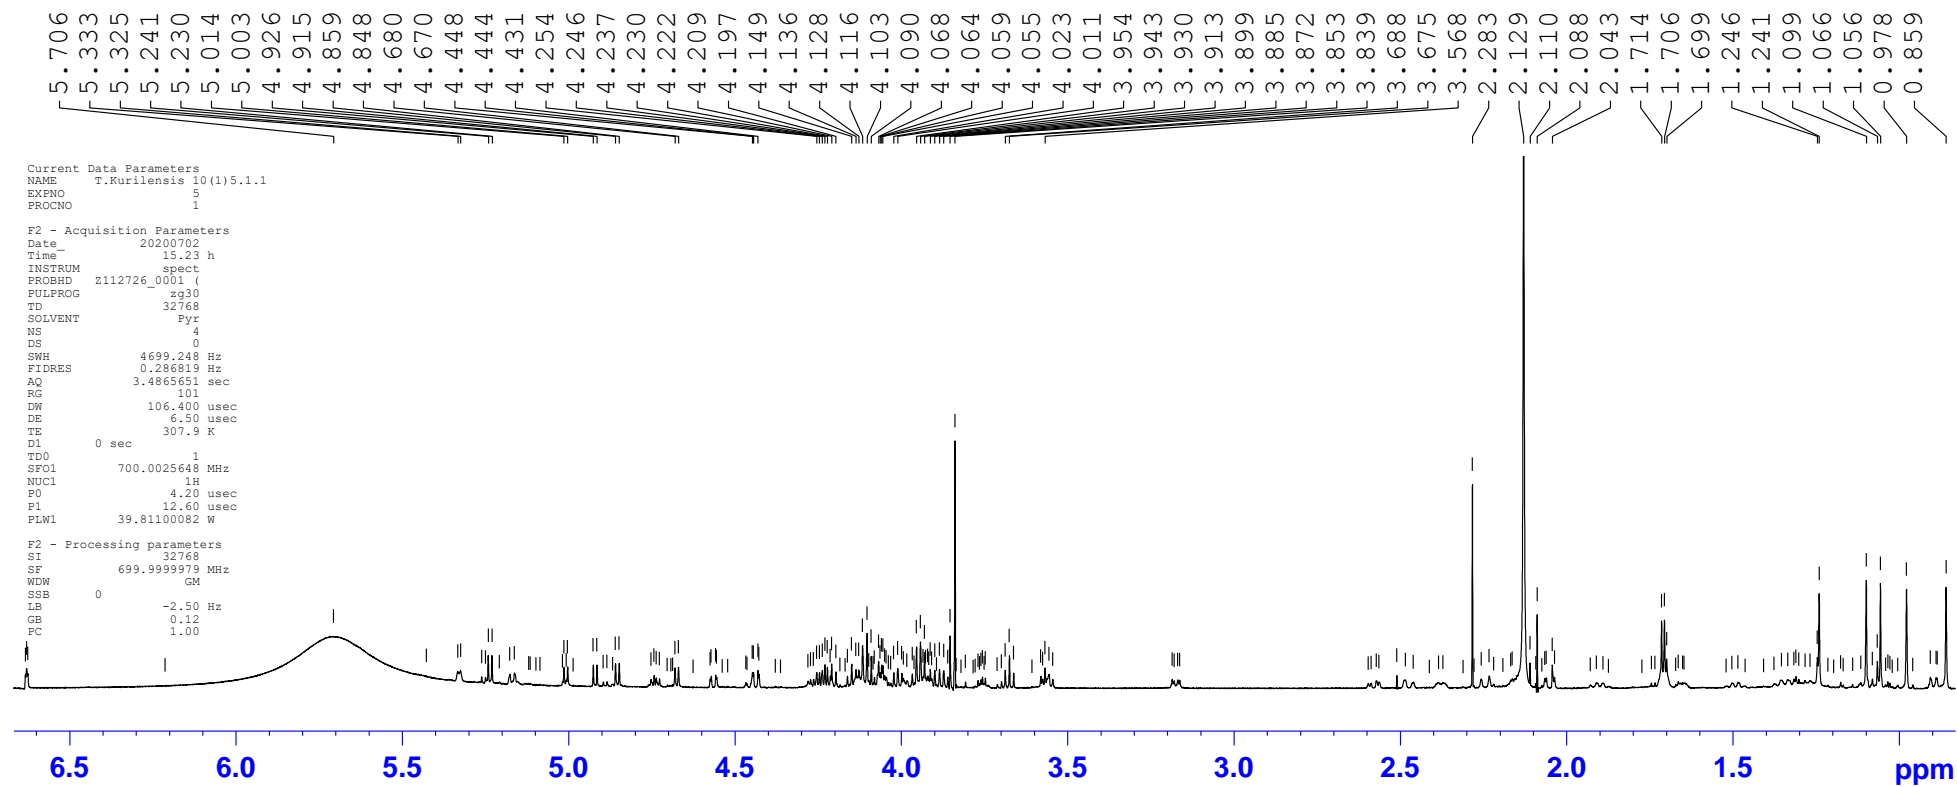

Figure S9. The  $^1\text{H}$  NMR (700.00 MHz) spectrum of kuriloside A<sub>2</sub> (2) in  $\text{C}_5\text{D}_5\text{N}/\text{D}_2\text{O}$  (4/1)

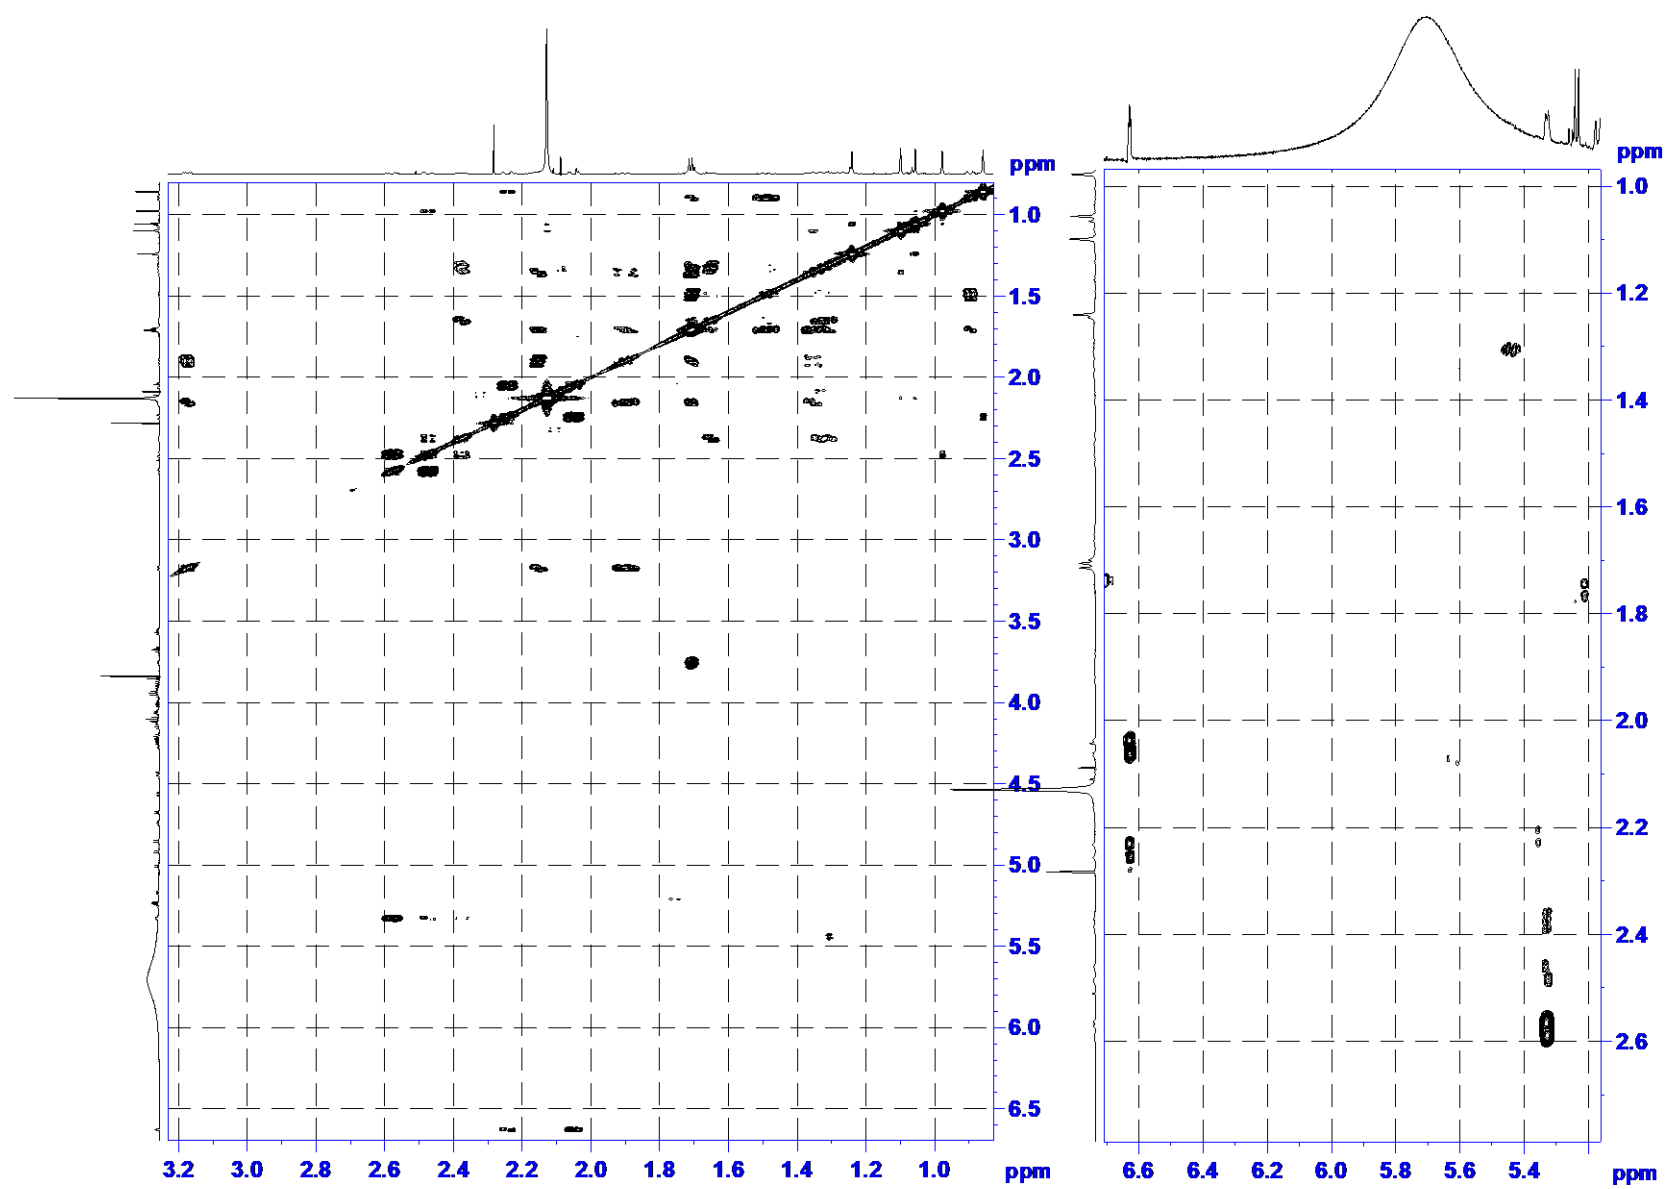

Figure S10. The COSY (700.00 MHz) spectrum of the aglycone part of kuriloside A<sub>2</sub> (**2**) in C<sub>5</sub>D<sub>5</sub>N/D<sub>2</sub>O (4/1)

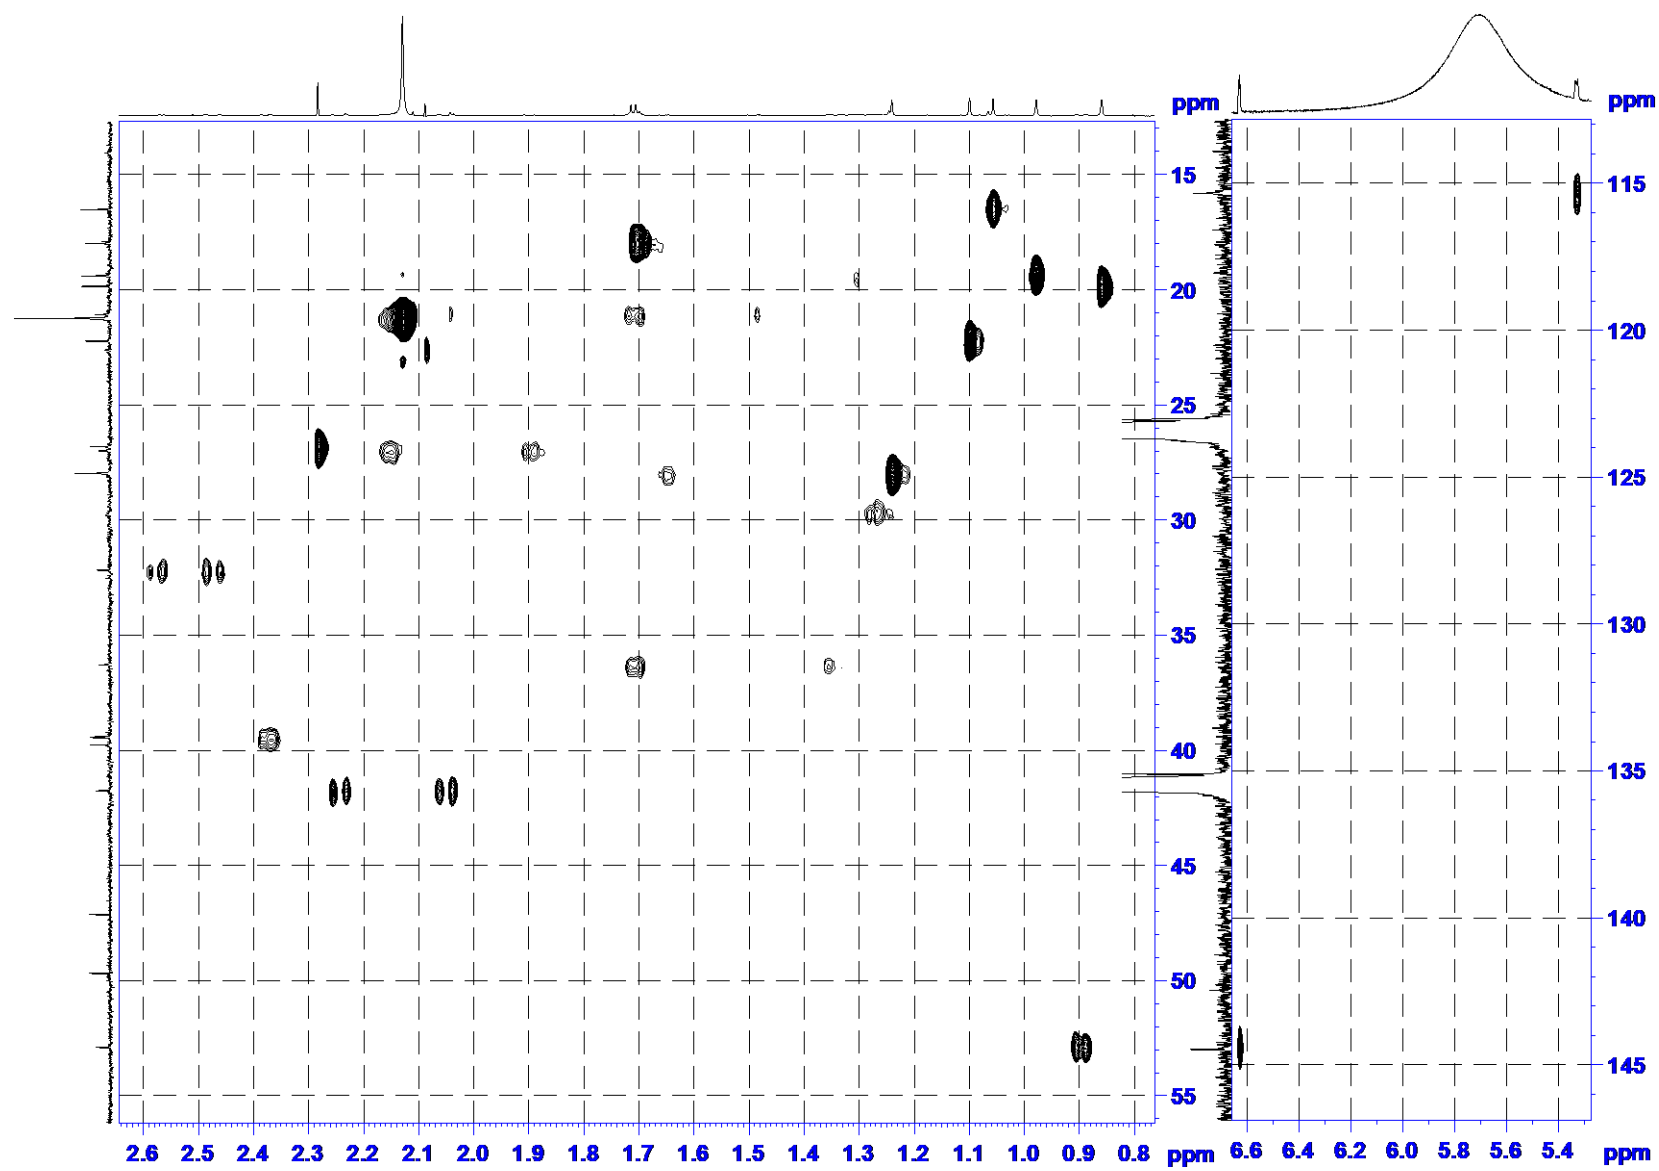

Figure S11. The HSQC (700.00 MHz) spectrum of the aglycone part of kuriloside A<sub>2</sub> (2) in C<sub>5</sub>D<sub>5</sub>N/D<sub>2</sub>O (4/1)

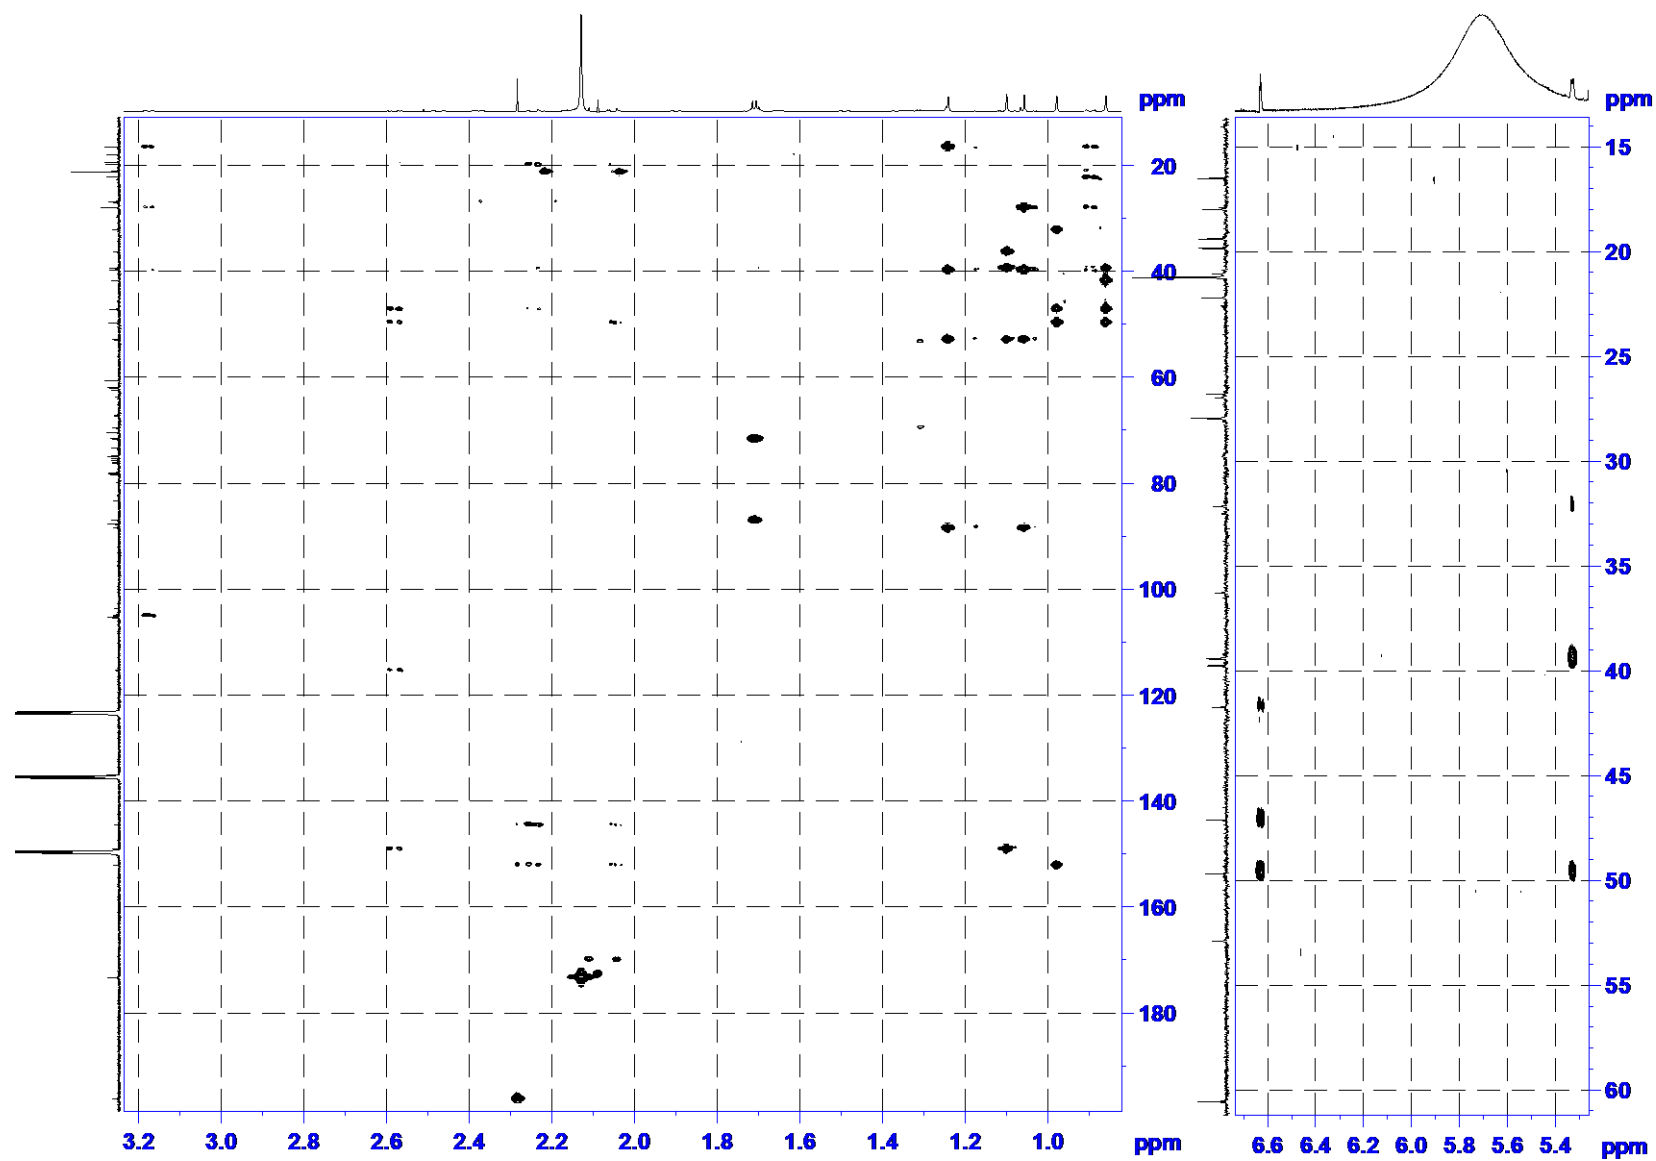

Figure S12. The HMBC (700.00 MHz) spectrum of the aglycone part of kuriloside A<sub>2</sub> (2) in C<sub>5</sub>D<sub>5</sub>N/D<sub>2</sub>O (4/1)



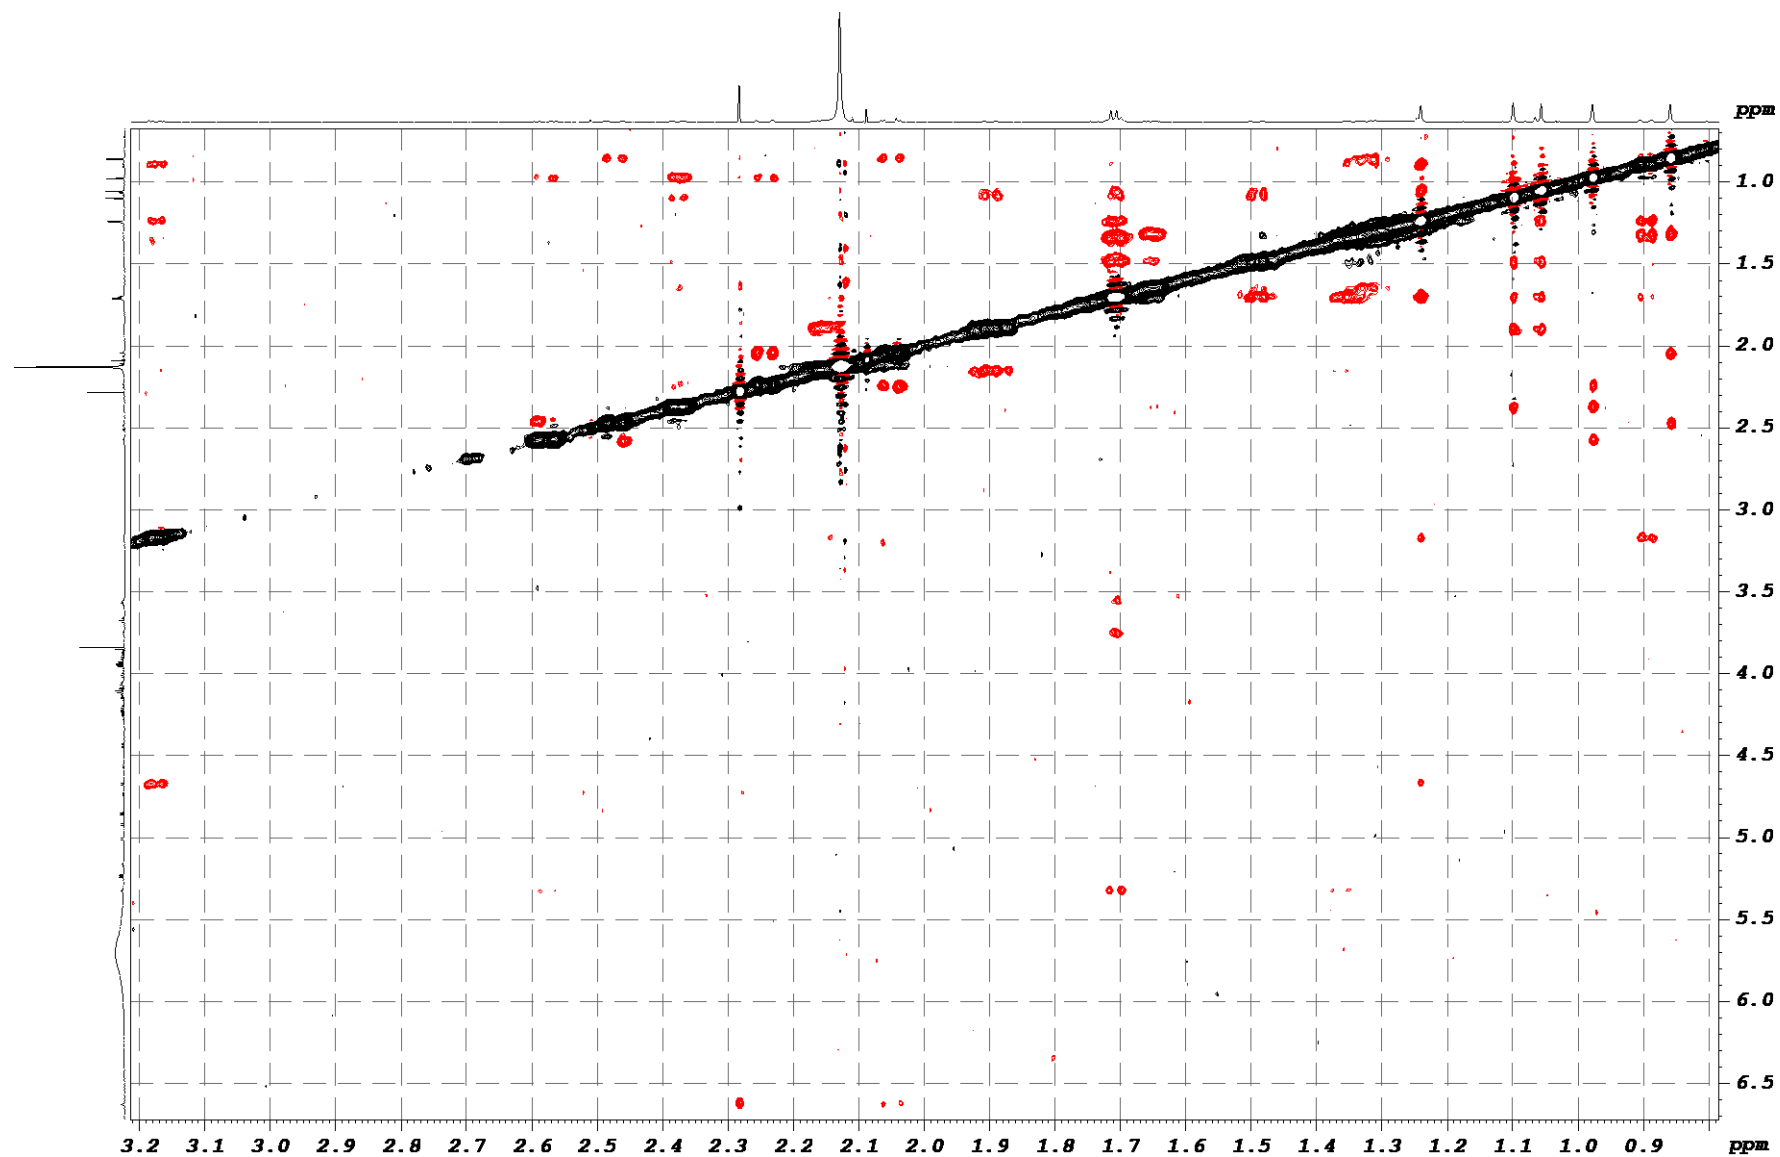

Figure S13. The ROESY (700.00 MHz) spectrum of the aglycone part of kuriloside A<sub>2</sub> (2) in C<sub>5</sub>D<sub>5</sub>N/D<sub>2</sub>O (4/1)

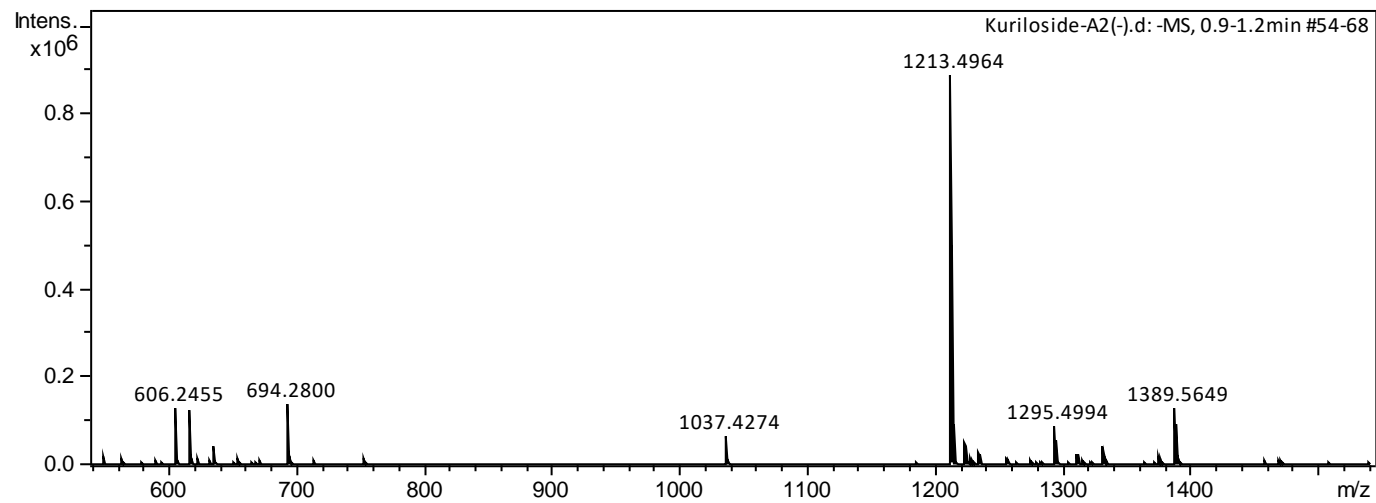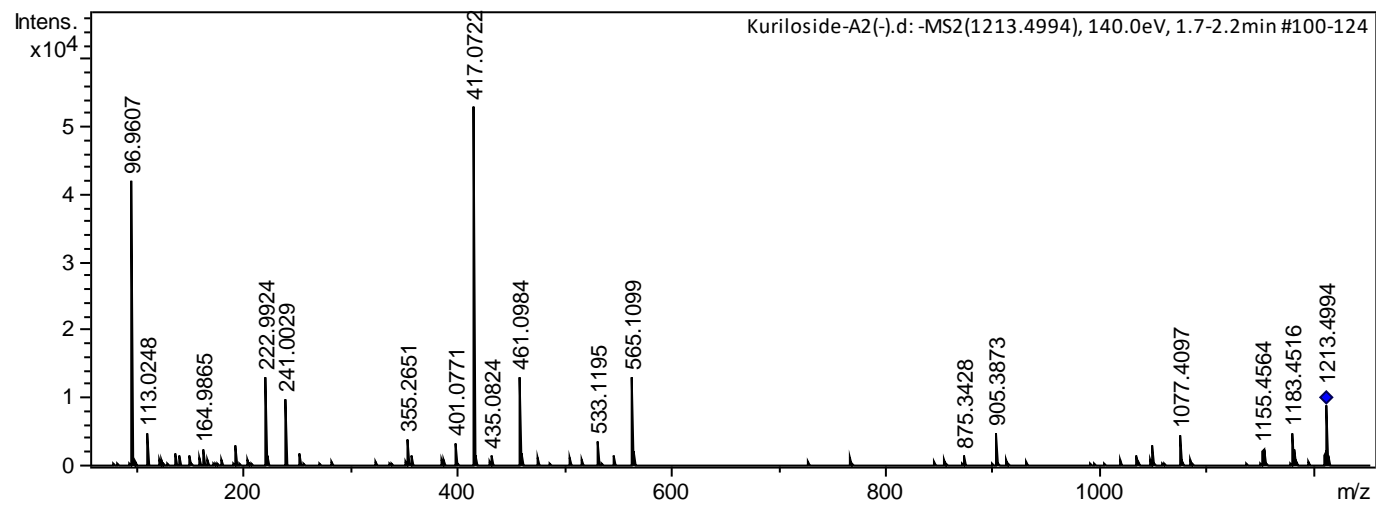

Figure S14. HR-ESI-MS and ESI-MS/MS spectra of kuriloside A<sub>2</sub> (2)

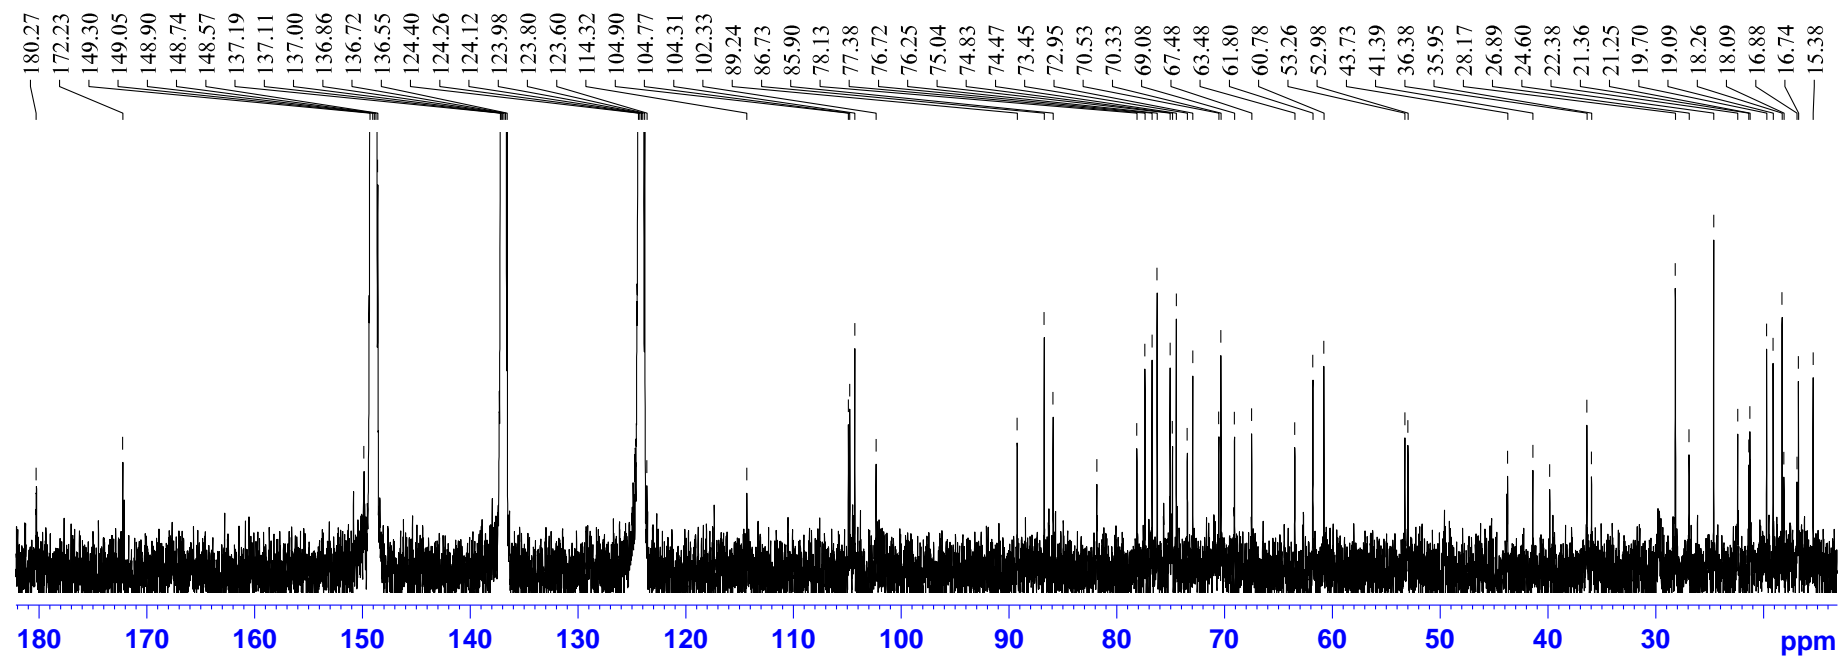

Figure S15. The  $^{13}\text{C}$  NMR (176.03 MHz) spectrum of kuriloside  $\text{C}_1$  (**3**) in  $\text{C}_5\text{D}_5\text{N}/\text{D}_2\text{O}$  (4/1)

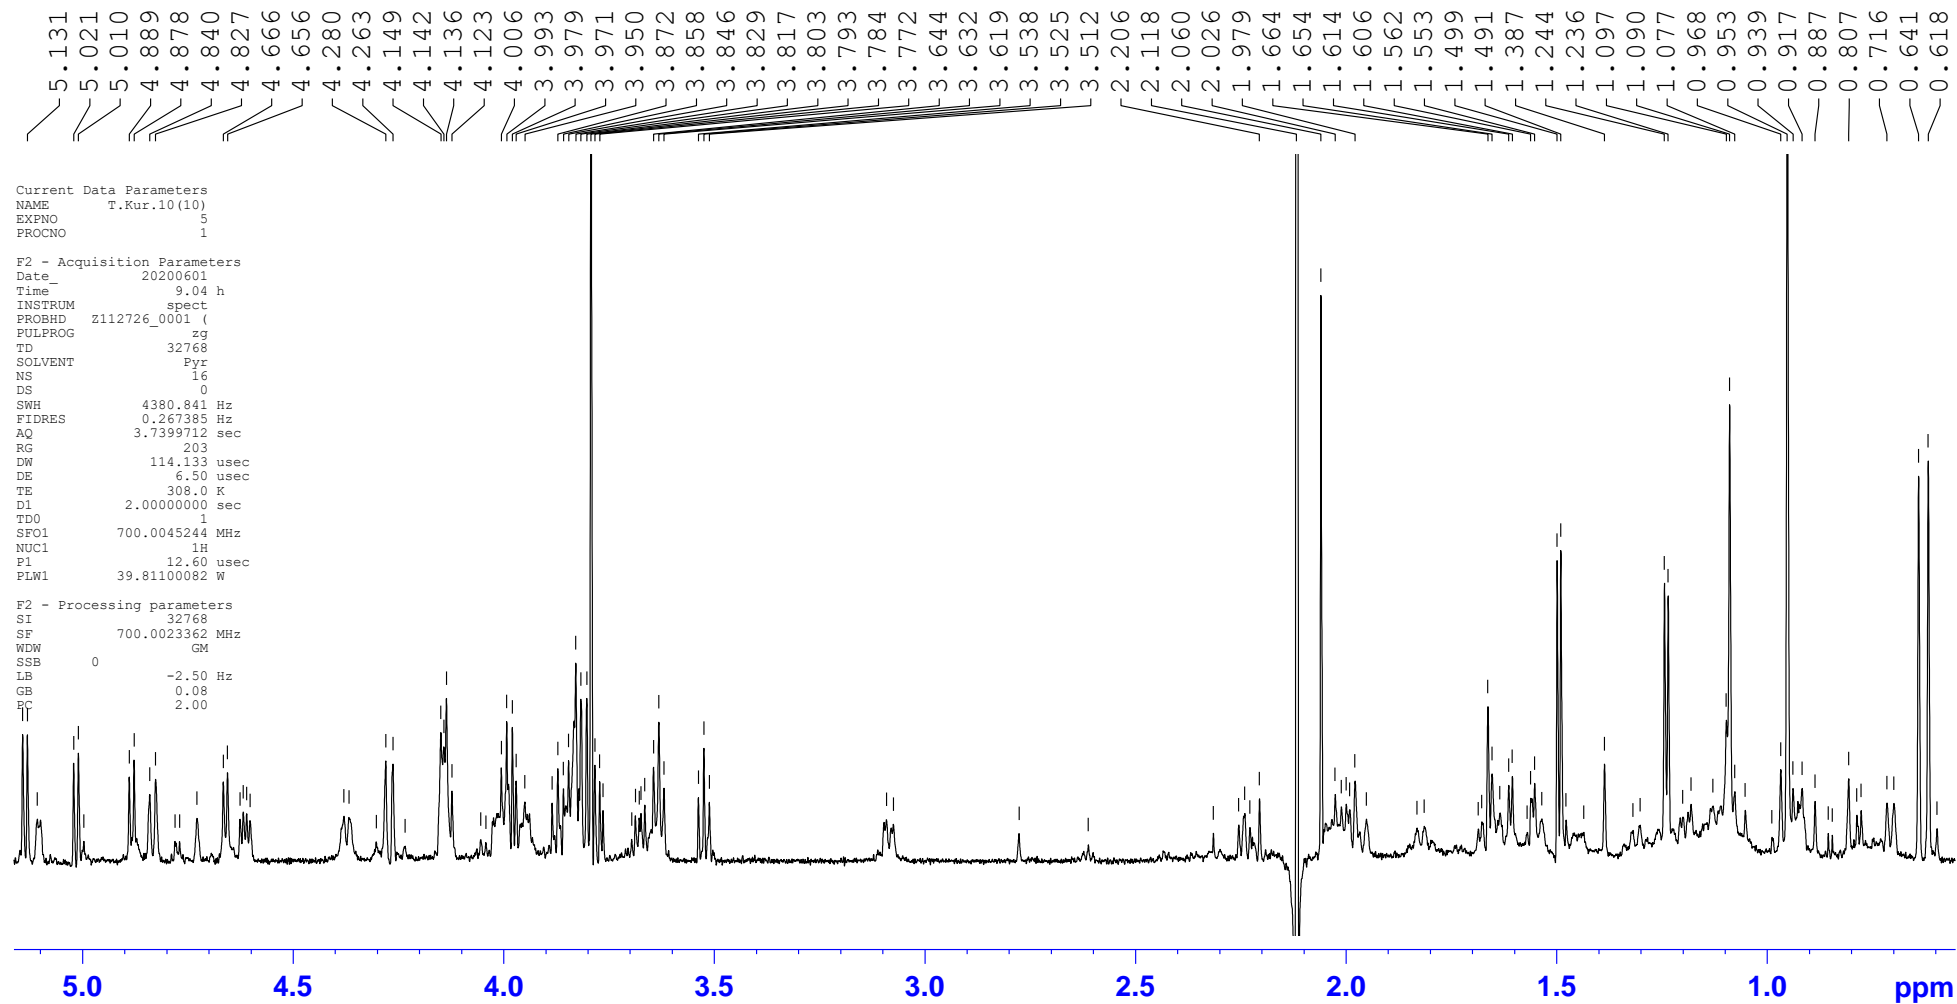

Figure S16. The  $^1\text{H}$  NMR (700.00 MHz) spectrum of kuriloside  $\text{C}_1$  (**3**) in  $\text{C}_5\text{D}_5\text{N}/\text{D}_2\text{O}$  (4/1)

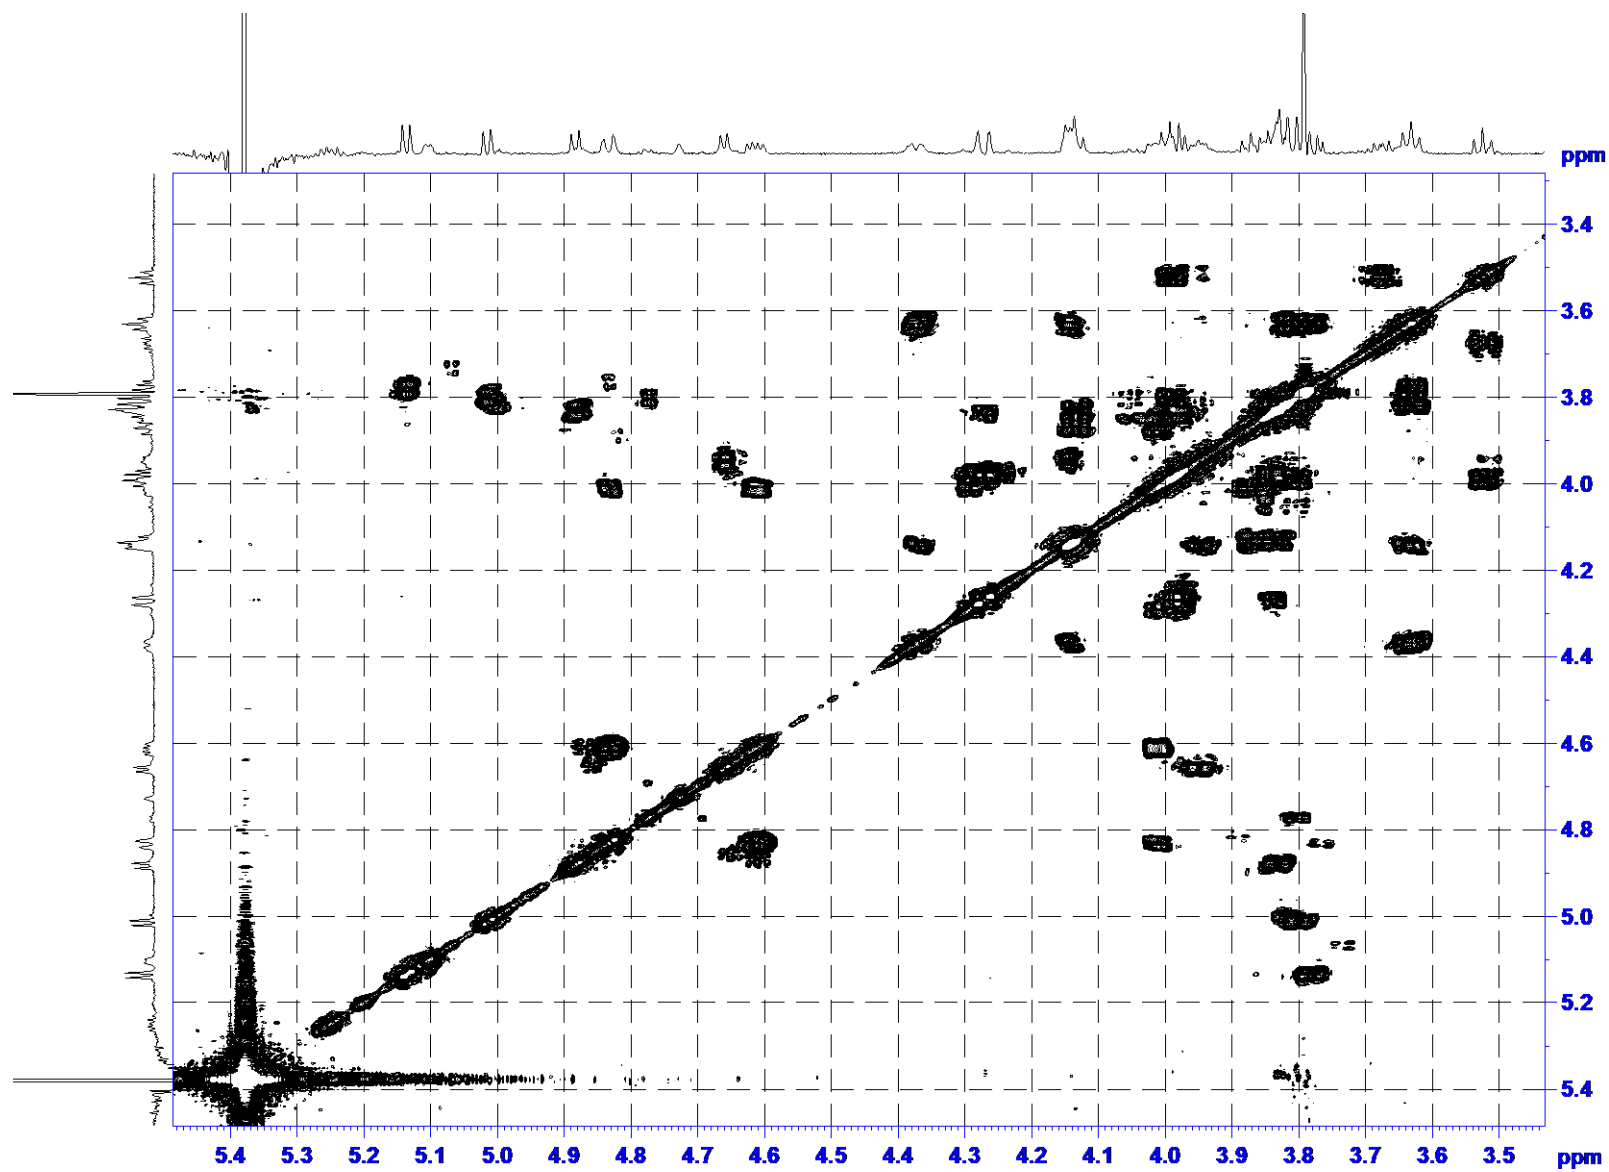

Figure S17. The COSY (700.00 MHz) spectrum of the carbohydrate part of kuriloside C<sub>1</sub> (**3**) in C<sub>5</sub>D<sub>5</sub>N/D<sub>2</sub>O (4/1)

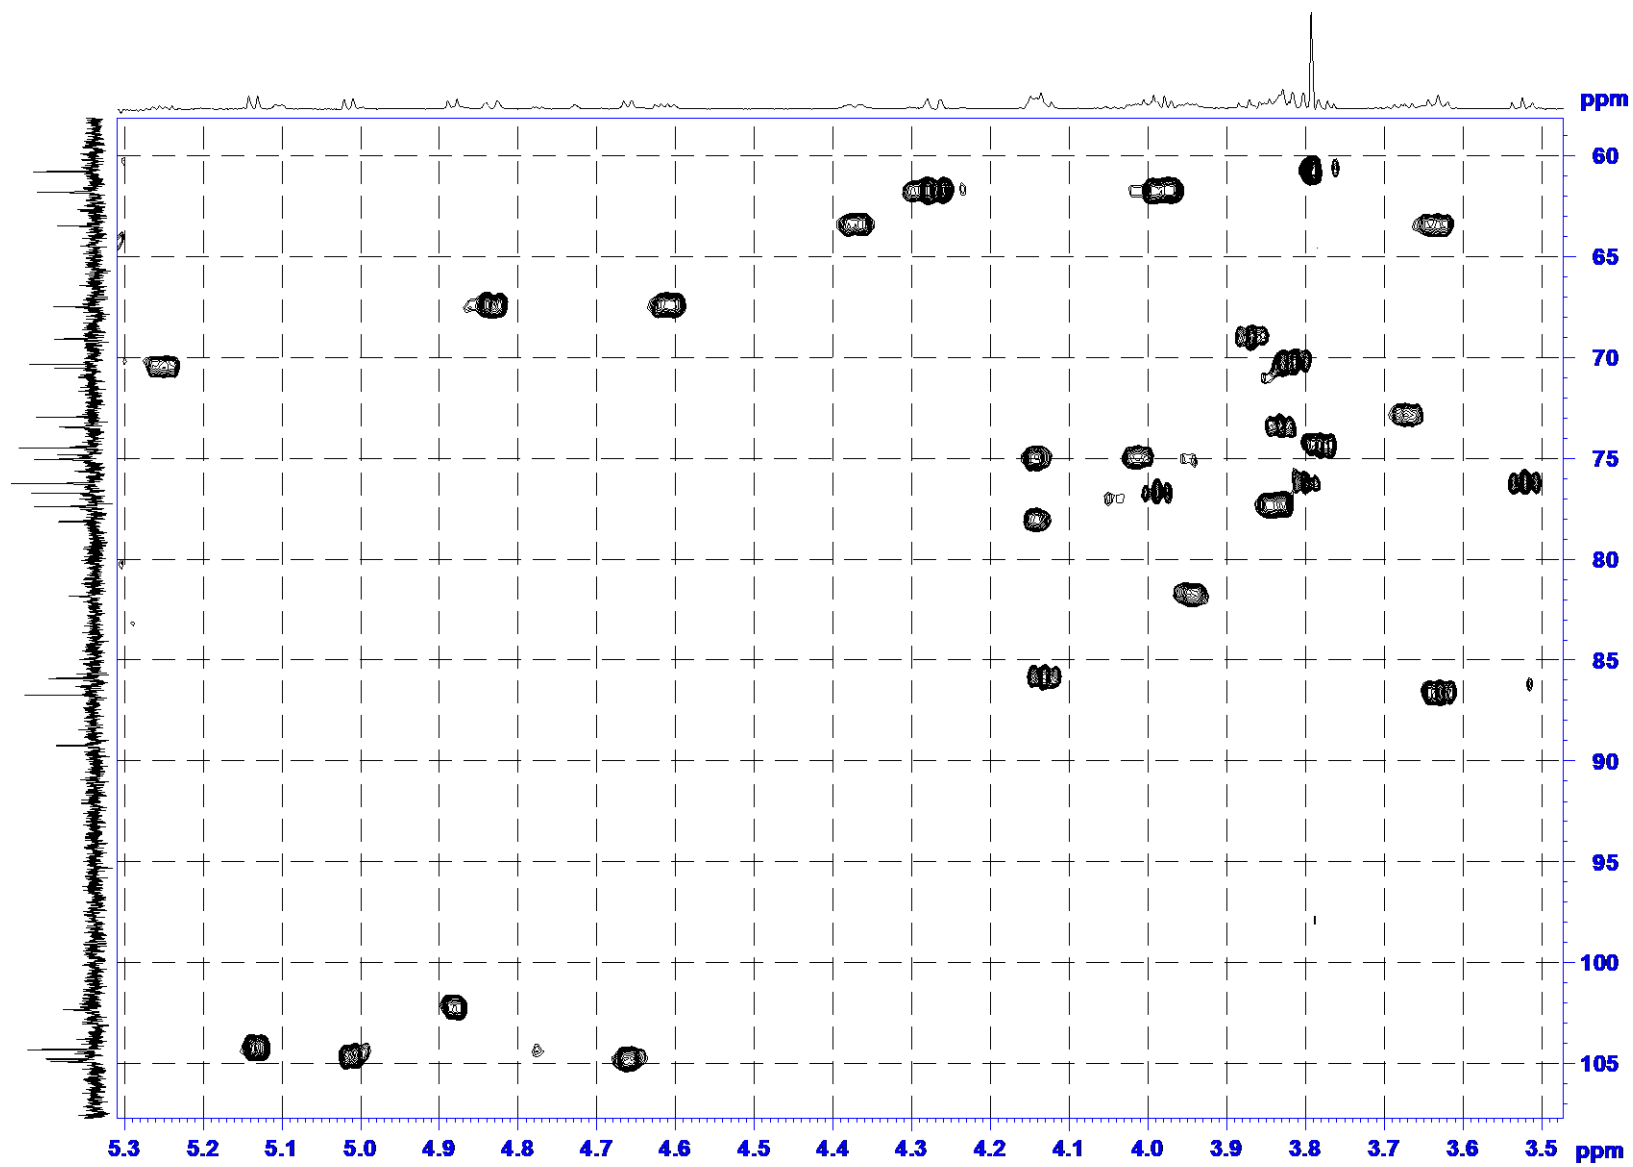

Figure S18. The HSQC (700.00 MHz) spectrum of the carbohydrate part of kuriloside  $\text{C}_1$  (3) in  $\text{C}_5\text{D}_5\text{N}/\text{D}_2\text{O}$  (4/1)

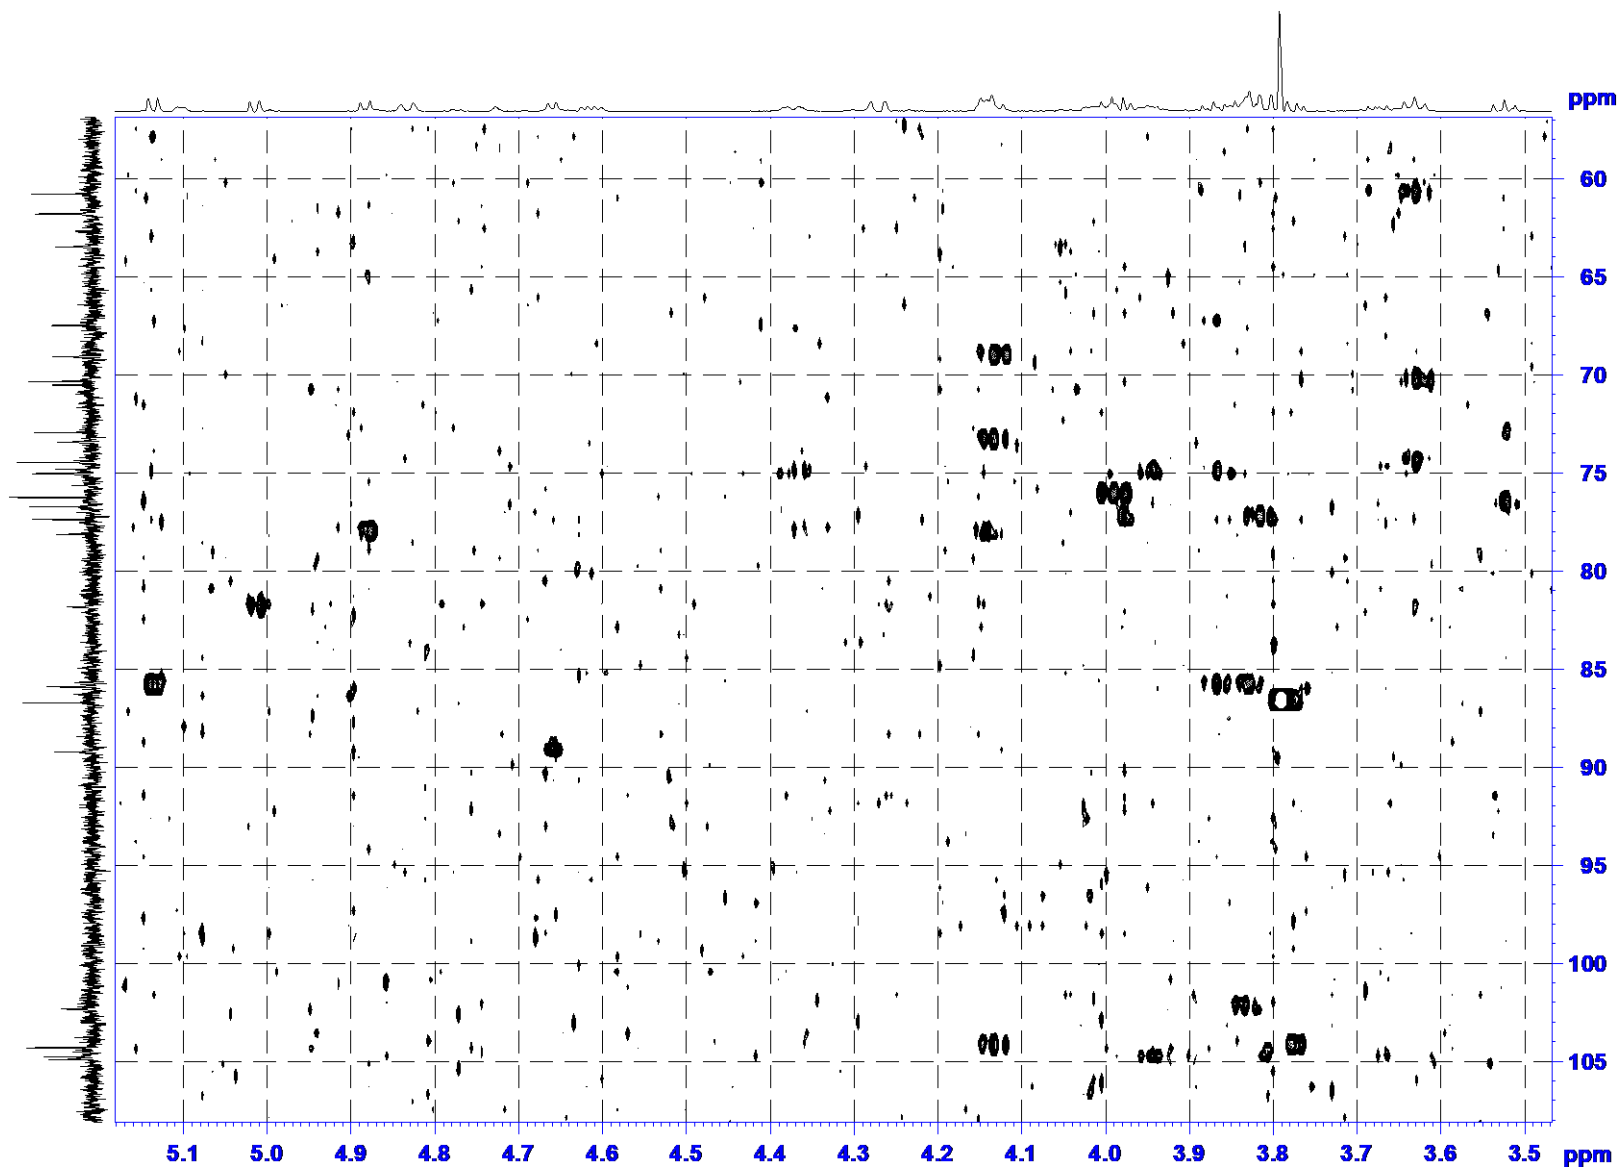

Figure S19. The HMBC (700.00 MHz) spectrum of the carbohydrate part of kuriloside C<sub>1</sub> (3) in C<sub>5</sub>D<sub>5</sub>N/D<sub>2</sub>O (4/1)

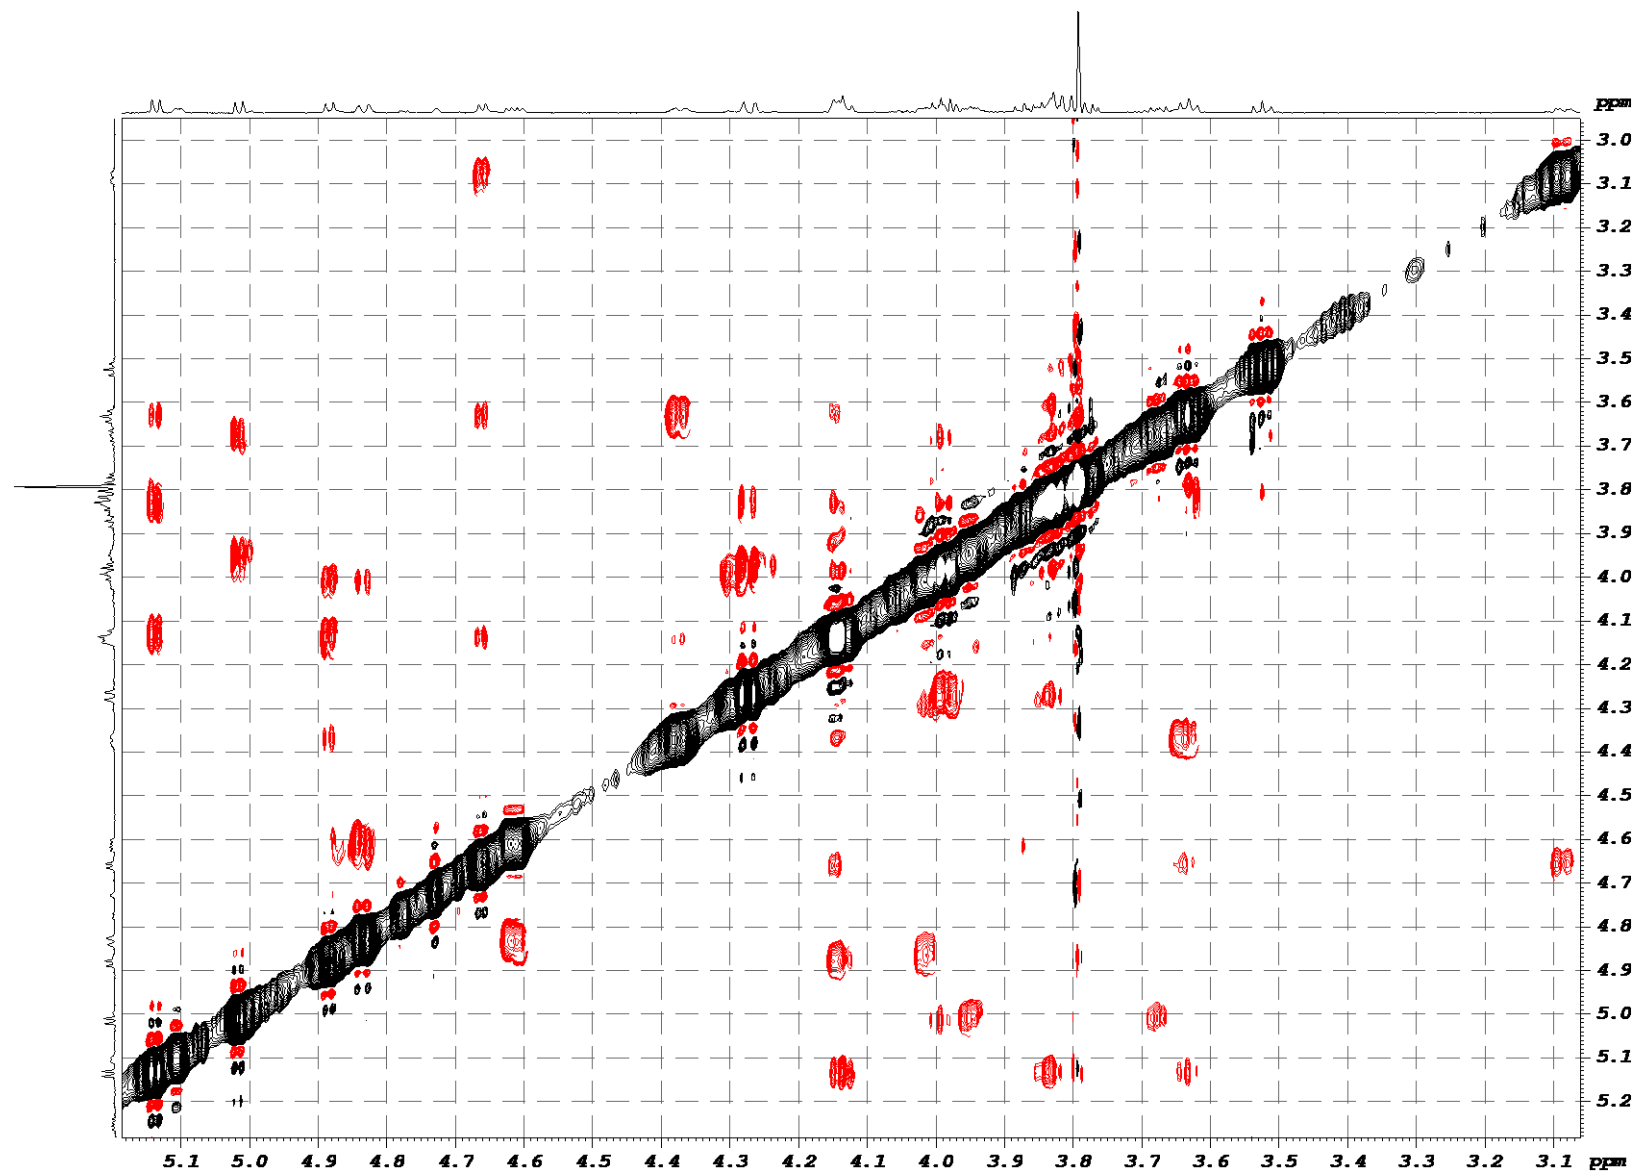

Figure S20. The ROESY (700.00 MHz) spectrum of the carbohydrate part of kuriloside C<sub>1</sub> (3) in C<sub>5</sub>D<sub>5</sub>N/D<sub>2</sub>O (4/1)



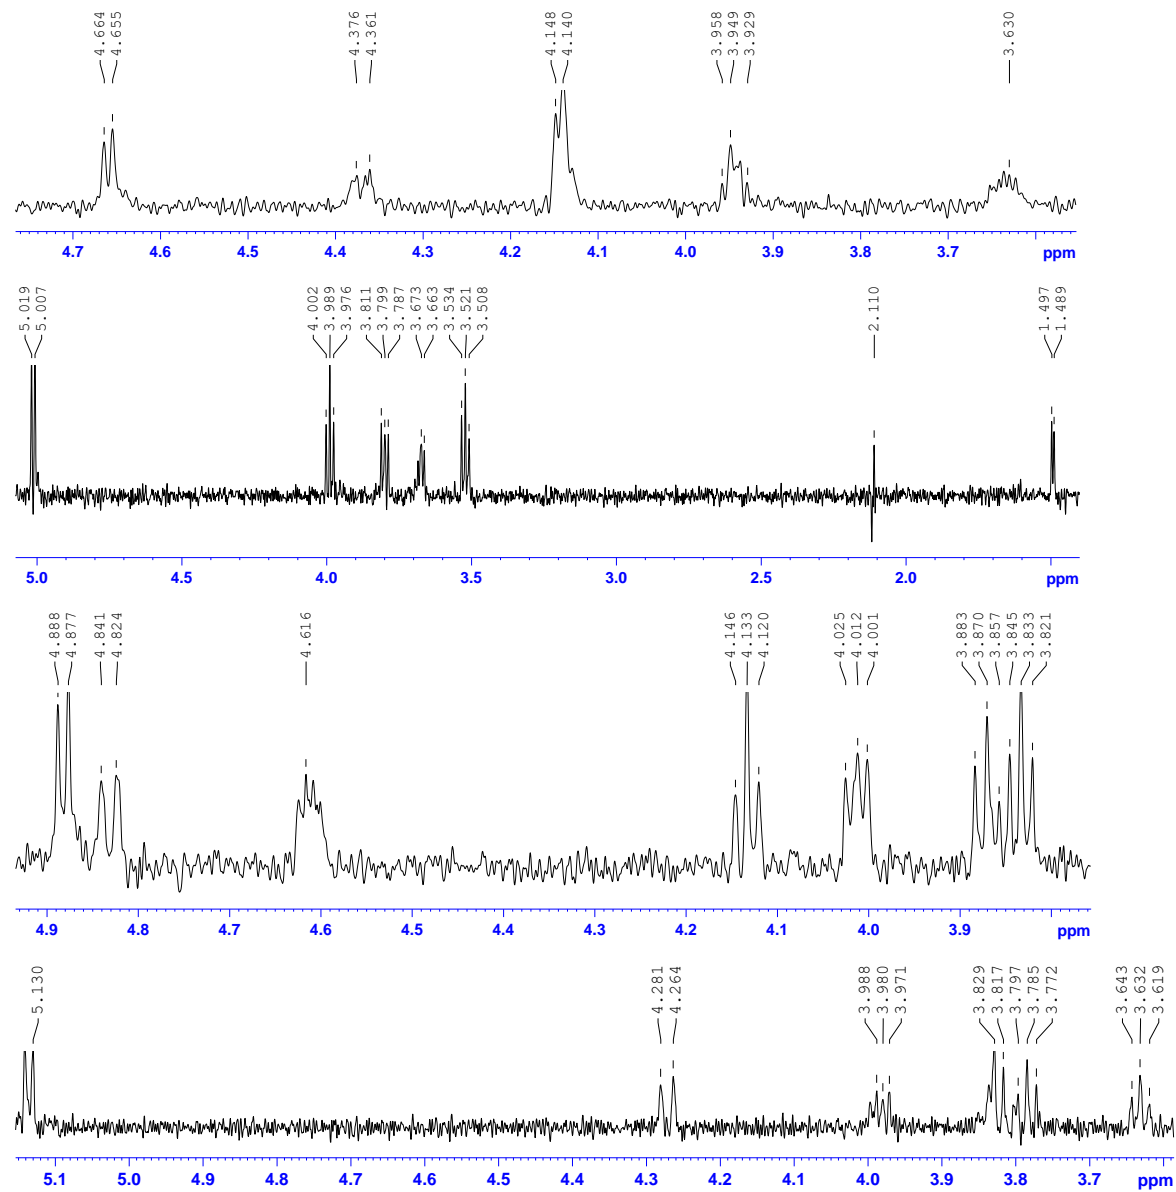

Figure S21. 1 D TOCSY (700.00 MHz) spectra of the carbohydrate part of kuriloside C<sub>1</sub> (**3**) in C<sub>5</sub>D<sub>5</sub>N/D<sub>2</sub>O (4/1)

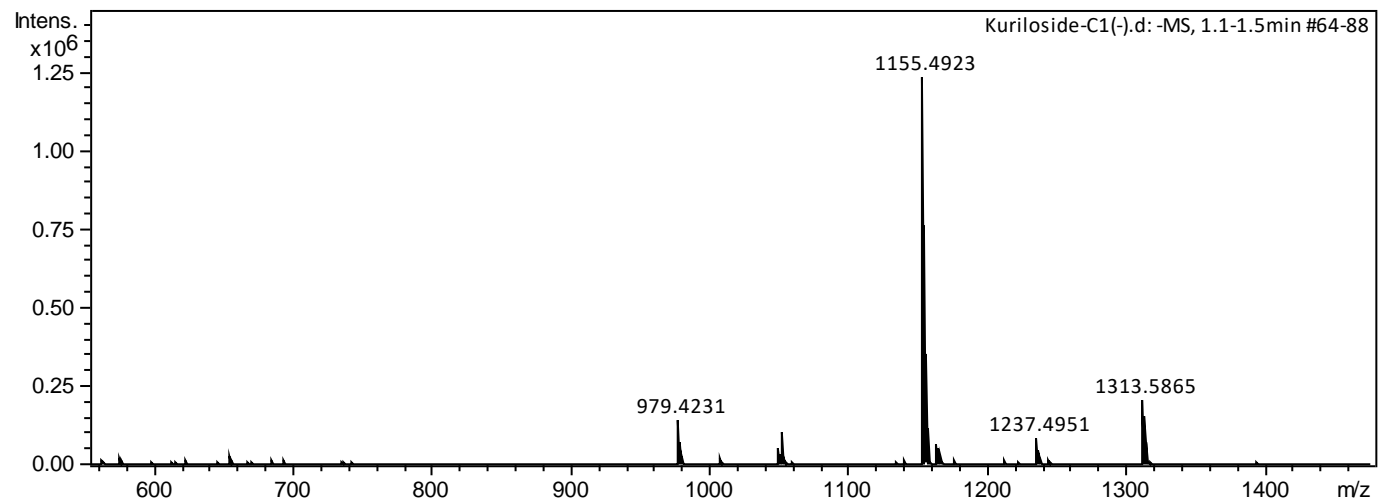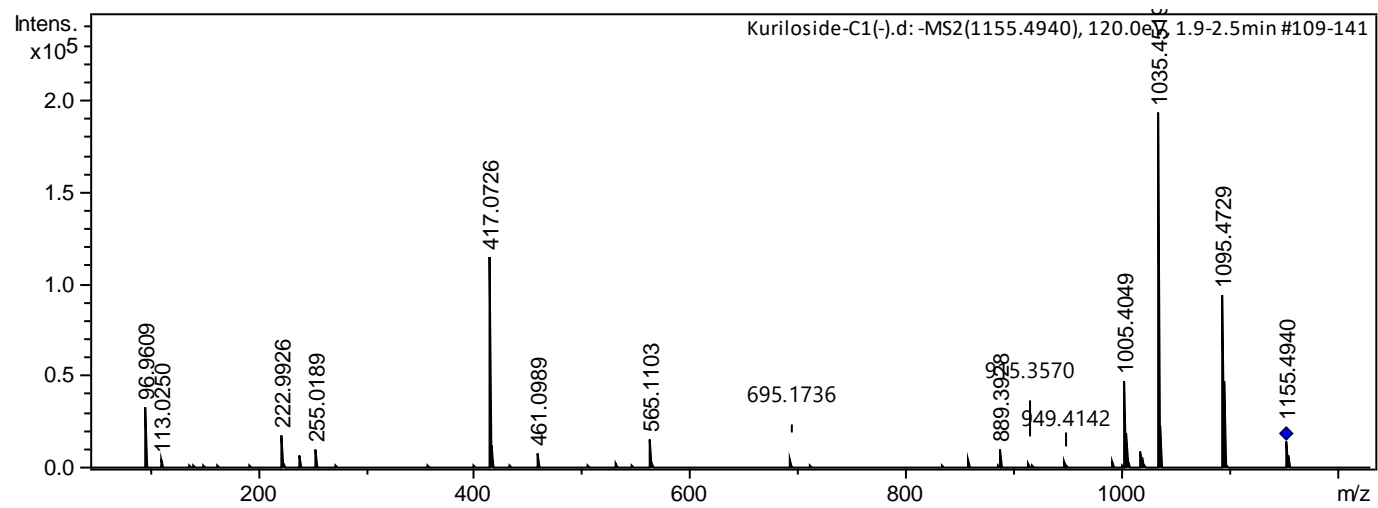

Figure S22. HR-ESI-MS and ESI-MS/MS spectra of kurilosiide C<sub>1</sub> (3)

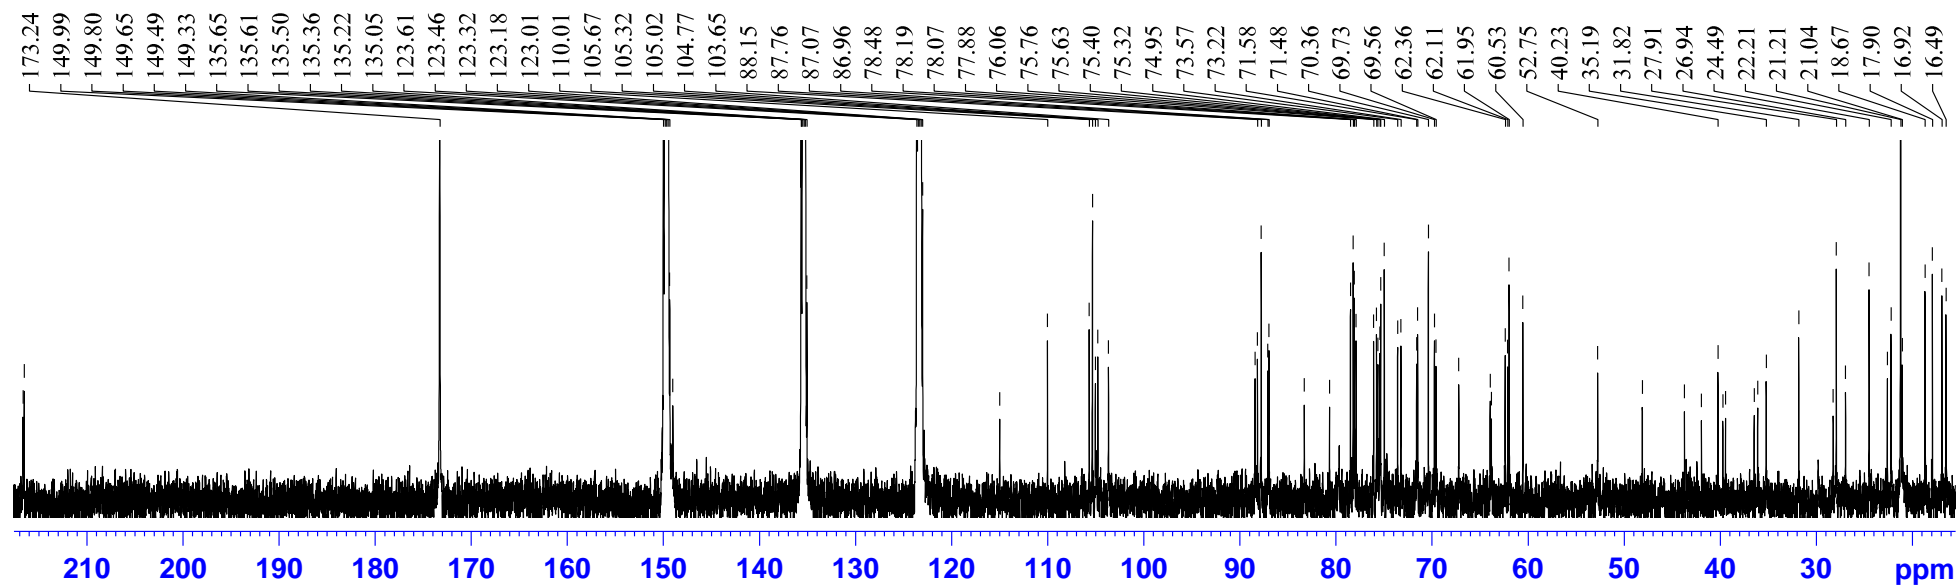

Figure S23. The  $^{13}\text{C}$  NMR (176.03 MHz) spectrum of kuriloside D (4) in  $\text{C}_5\text{D}_5\text{N}/\text{D}_2\text{O}$  (4/1)

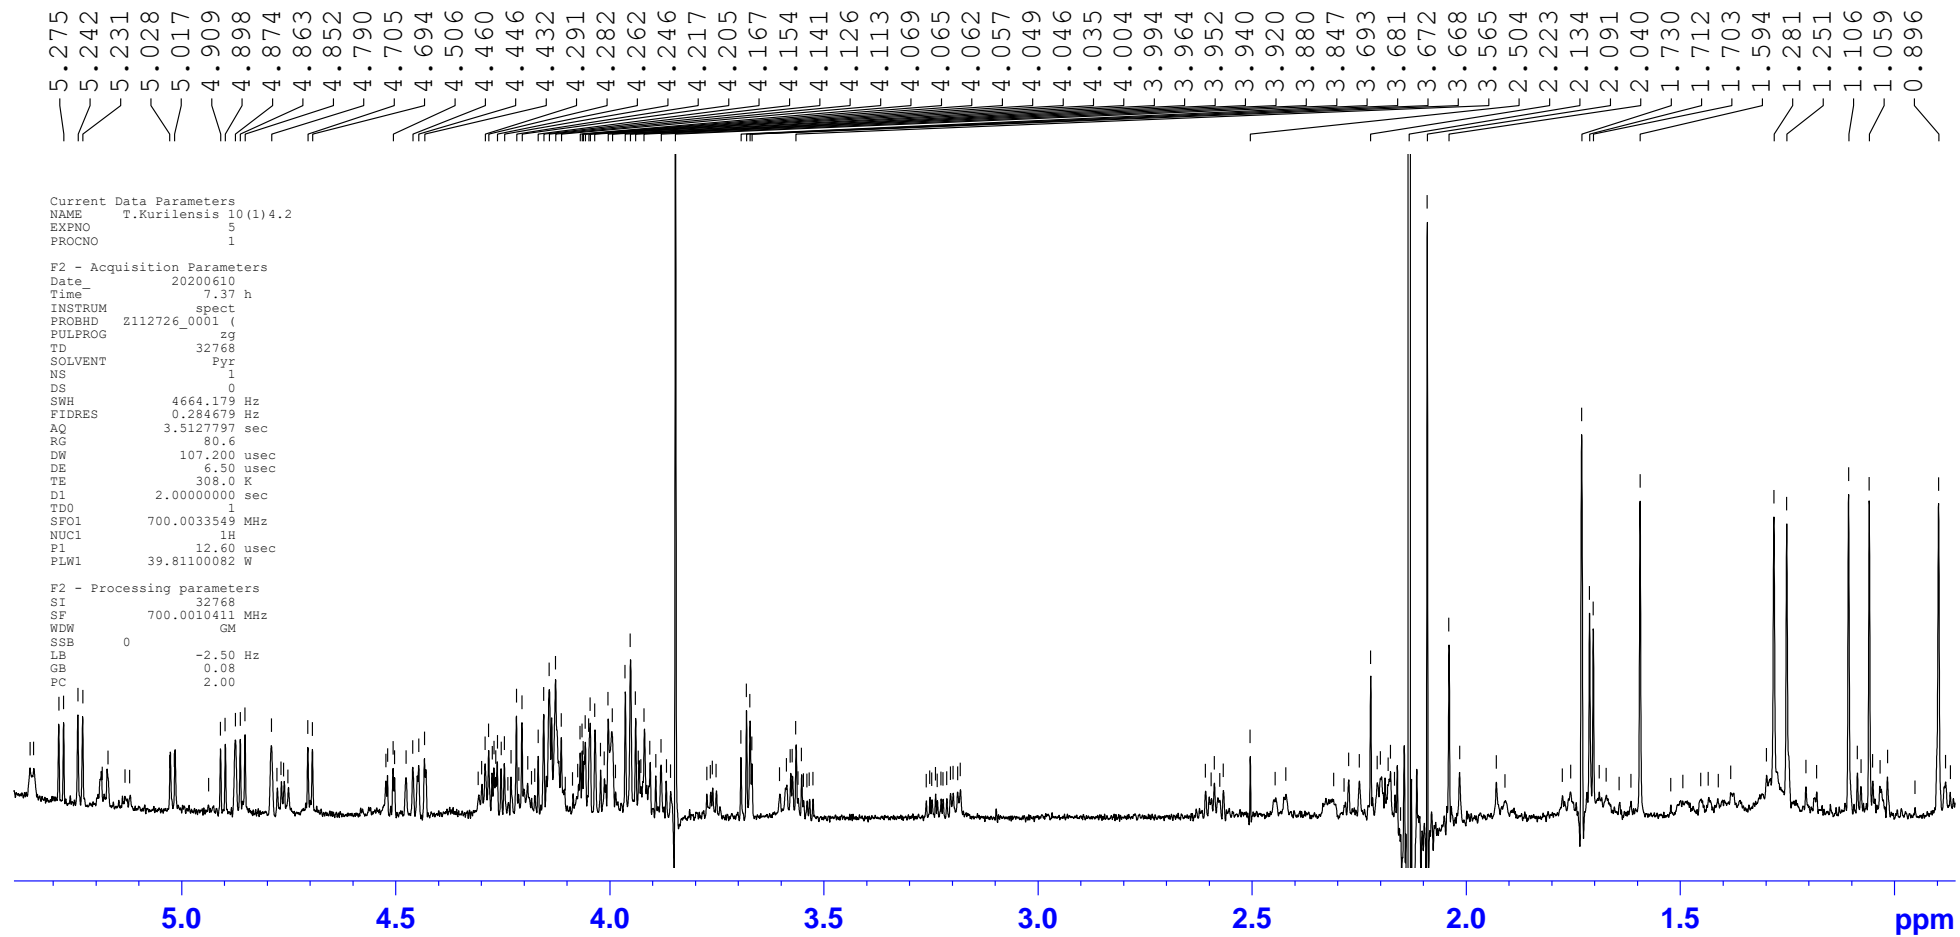

Figure S24. The  $^1\text{H}$  NMR (700.00 MHz) spectrum of kurilaside D (**4**) in  $\text{C}_5\text{D}_5\text{N}/\text{D}_2\text{O}$  (4/1)

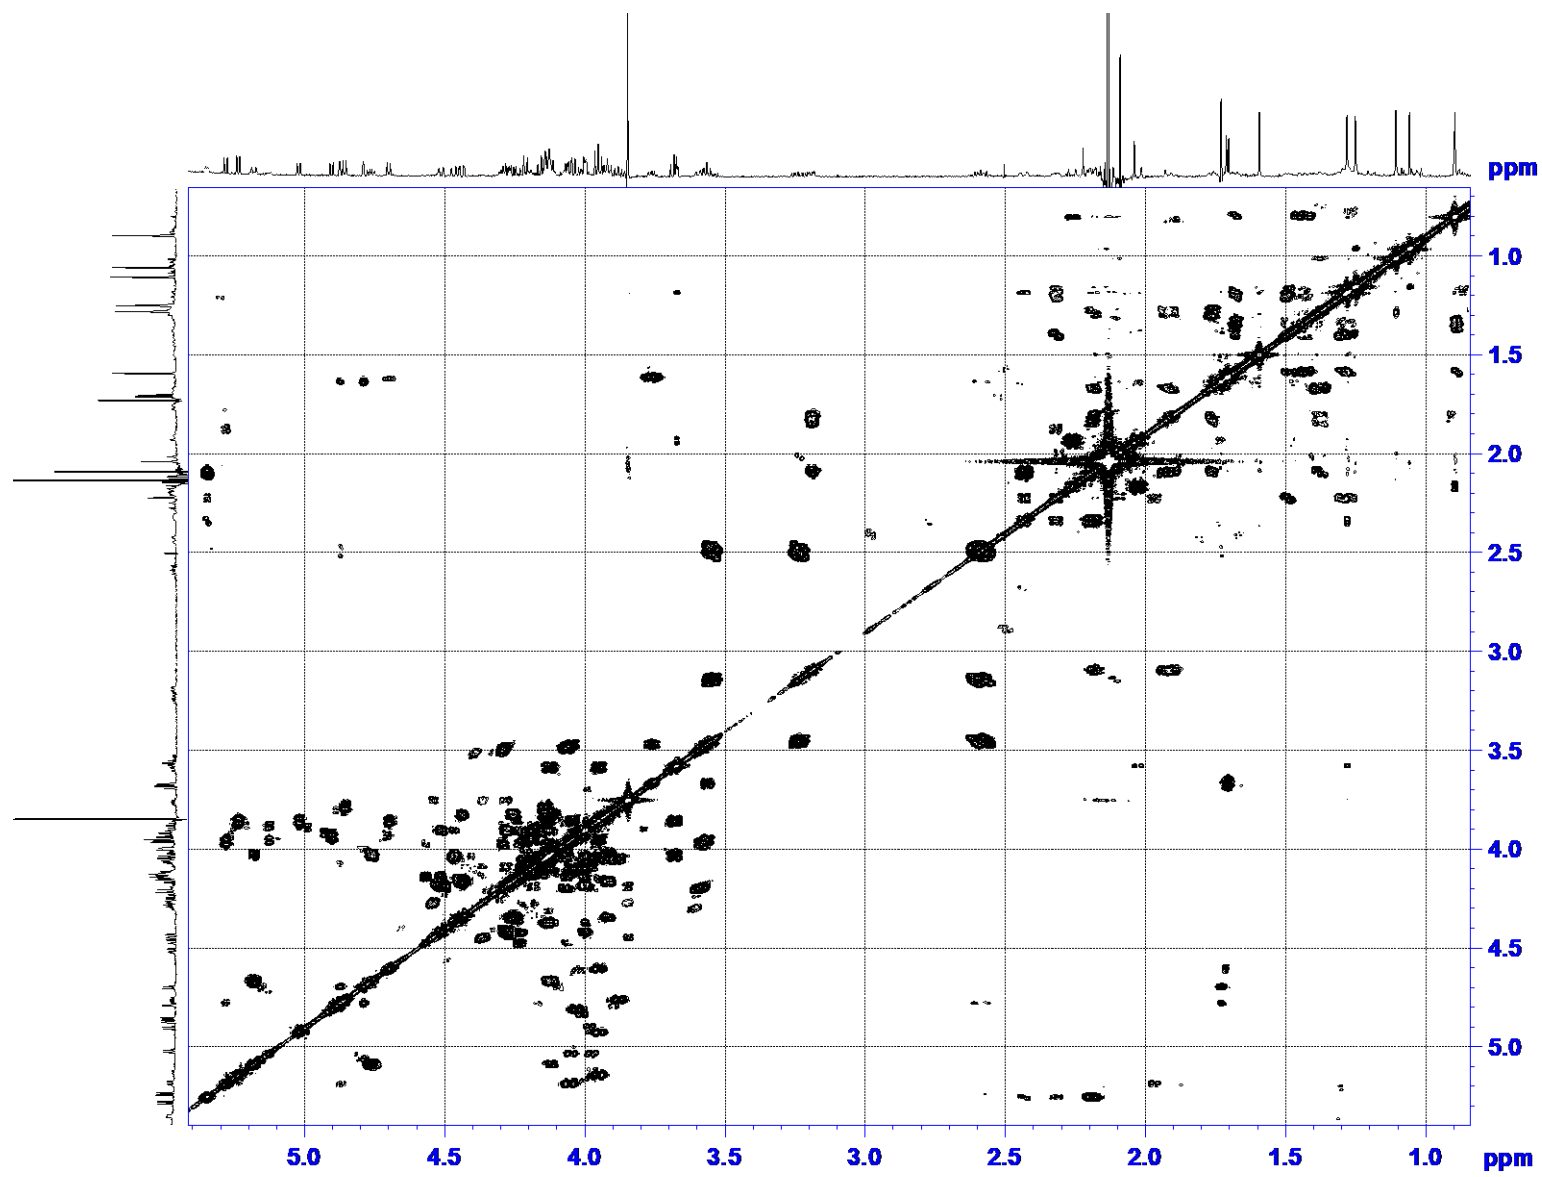

Figure S25. The COSY (700.00 MHz) spectrum of kuriloside D (**4**) in  $C_5D_5N/D_2O$  (4/1)

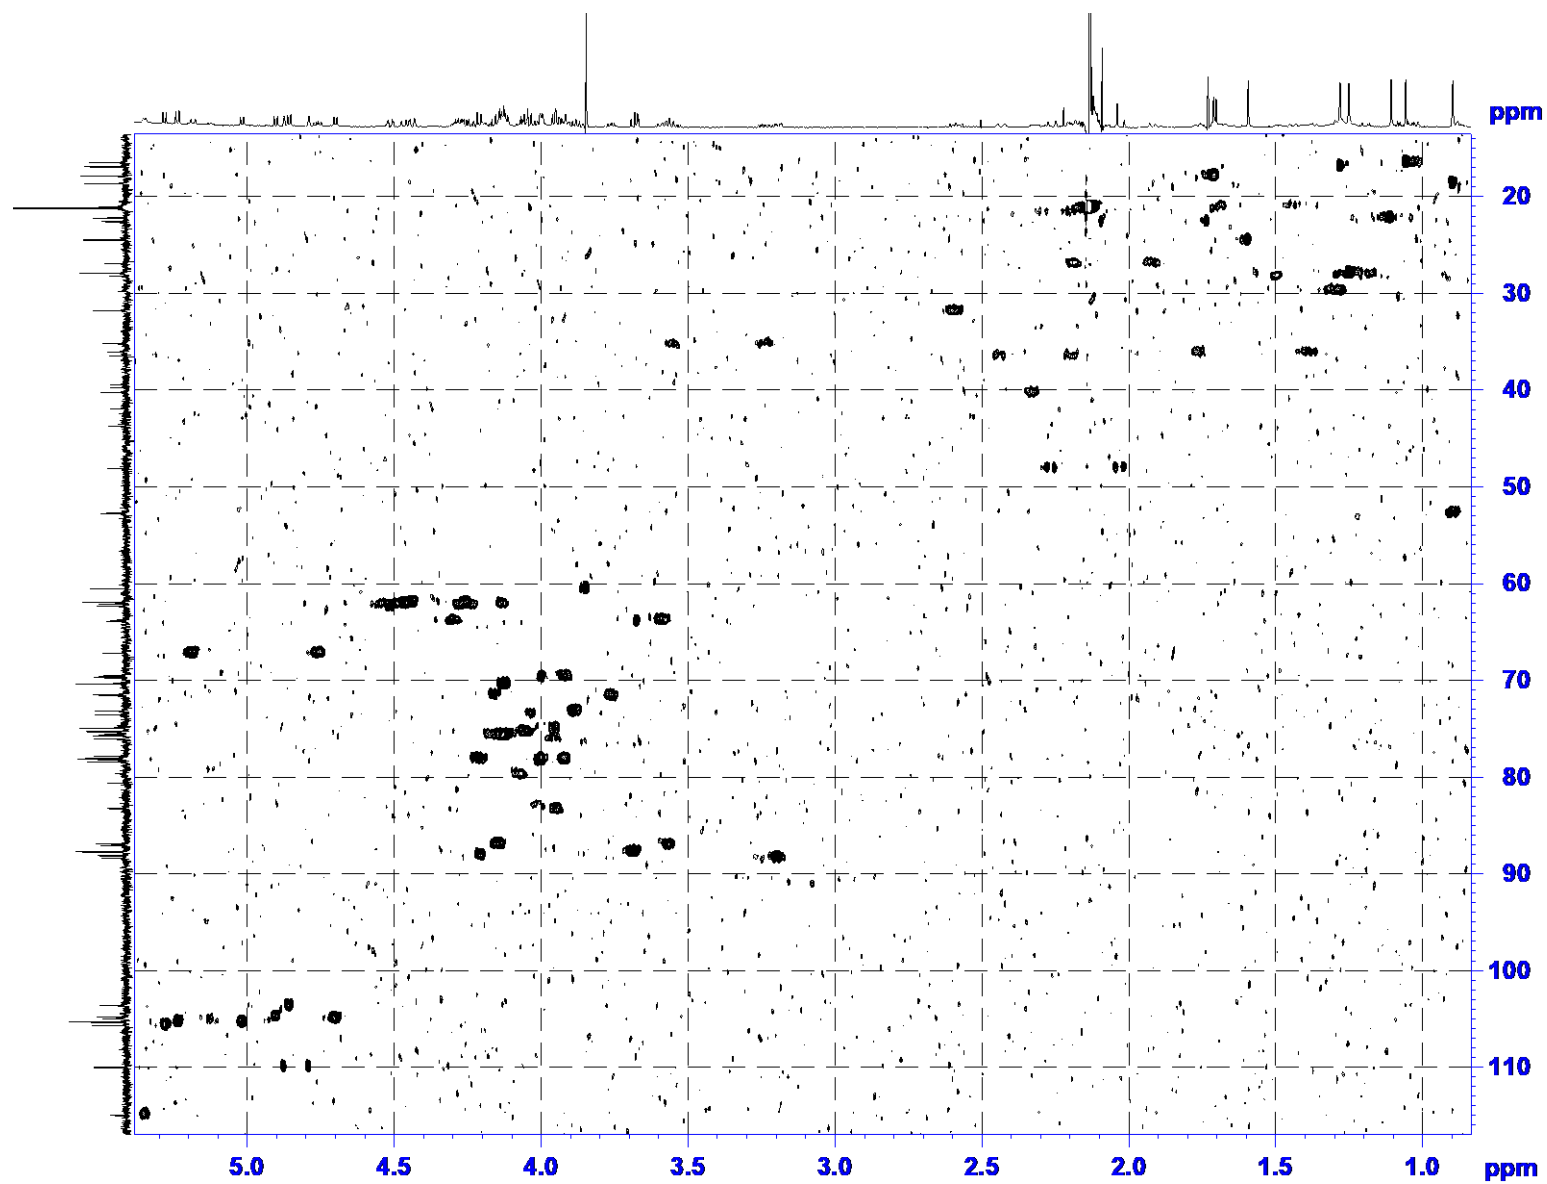

Figure S26. The HSQC (700.00 MHz) spectrum of kuriloside D (4) in C<sub>5</sub>D<sub>5</sub>N/D<sub>2</sub>O (4/1)

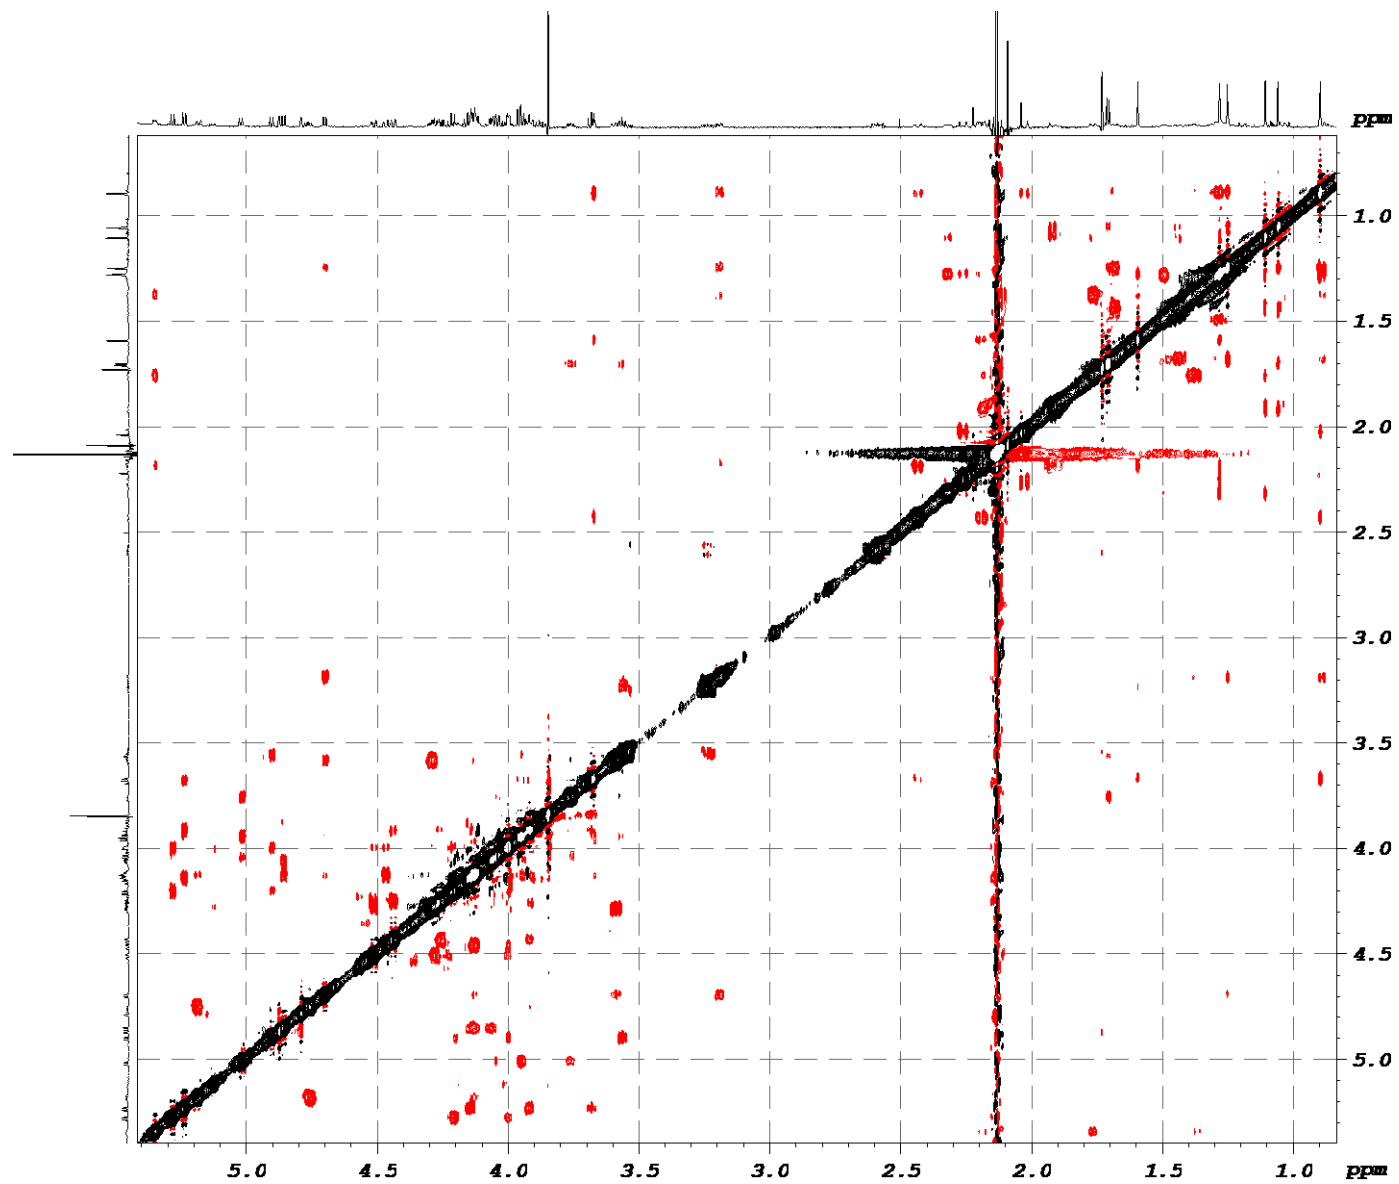

Figure S27. The ROESY (700.00 MHz) spectrum of kuriloside D (**4**) in C<sub>5</sub>D<sub>5</sub>N/D<sub>2</sub>O (4/1)

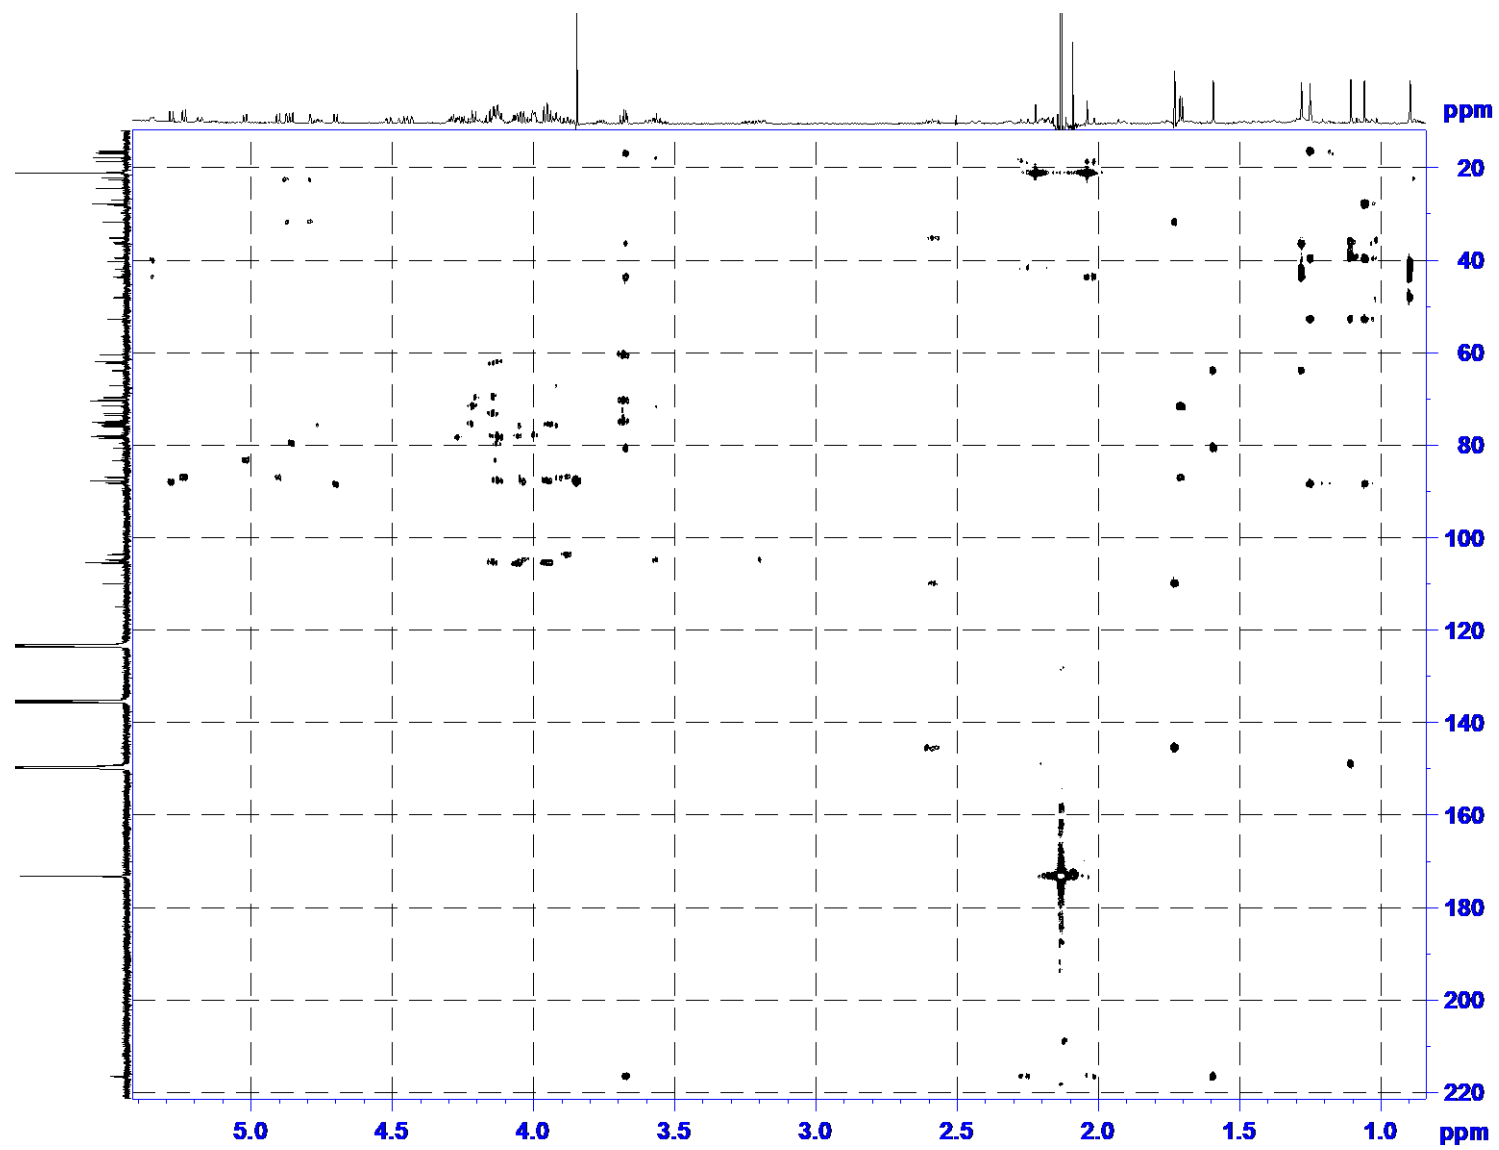

Figure S28. The HMBC (700.00 MHz) spectrum of kuriloside D (4) in  $\text{C}_5\text{D}_5\text{N}/\text{D}_2\text{O}$  (4/1)



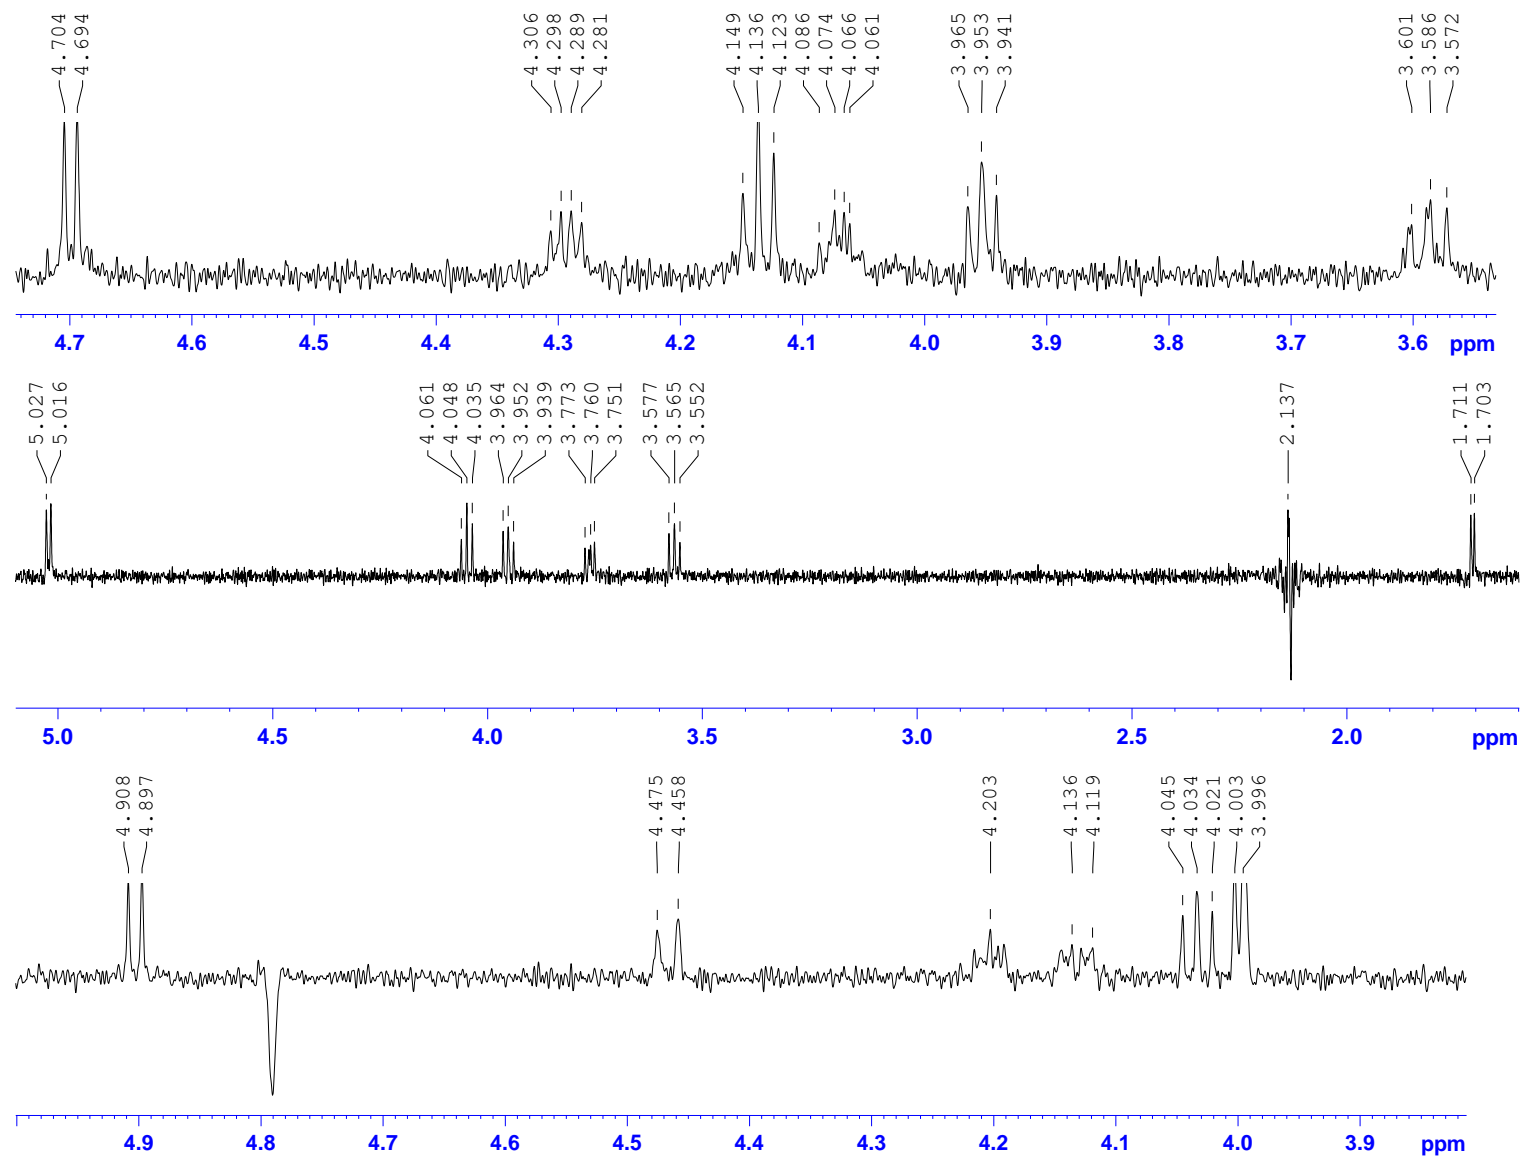

Figure S29. 1 D TOCSY (700.00 MHz) spectra of kuriloside D (**4**) in C<sub>5</sub>D<sub>5</sub>N/D<sub>2</sub>O (4/1)

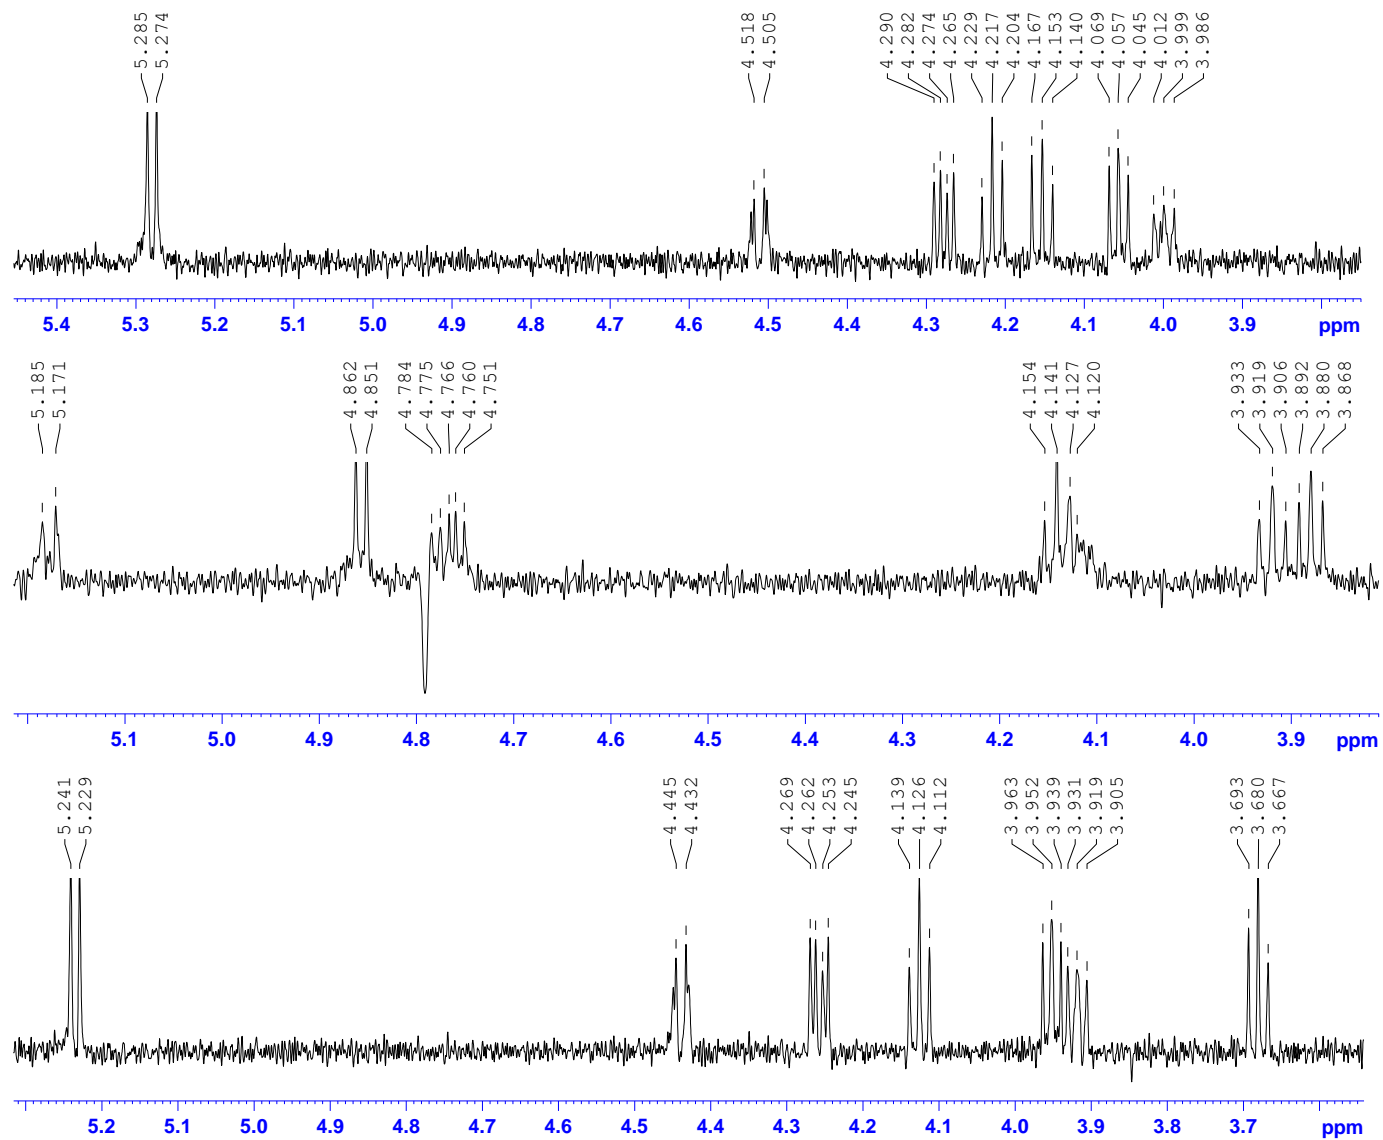

Figure S30. 1 D TOCSY (700.00 MHz) spectra of kuriloside D (**4**) in C<sub>5</sub>D<sub>5</sub>N/D<sub>2</sub>O (4/1)

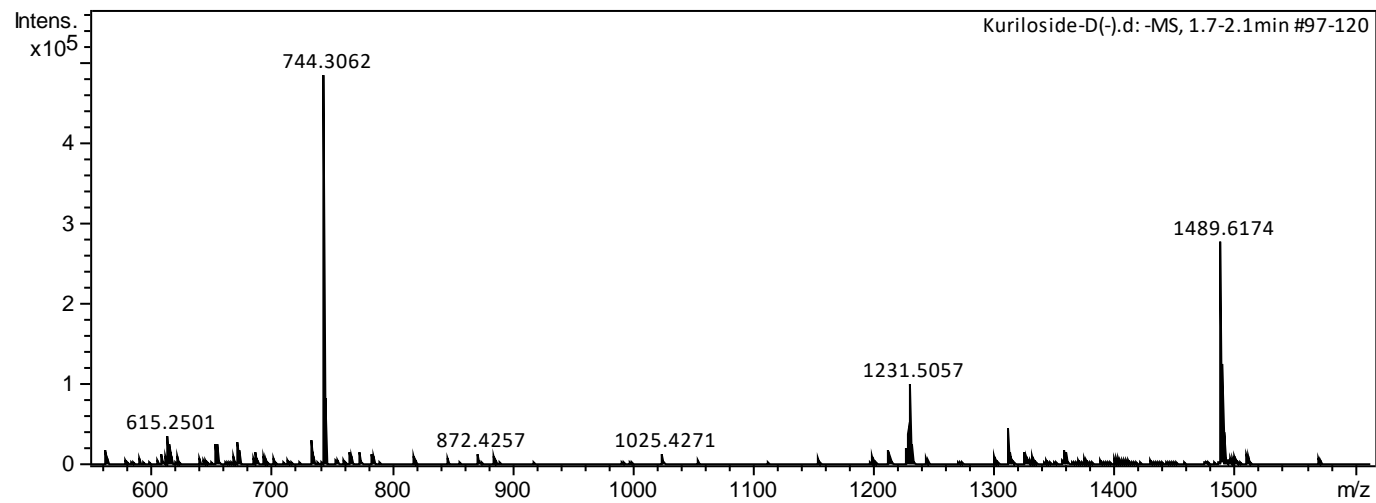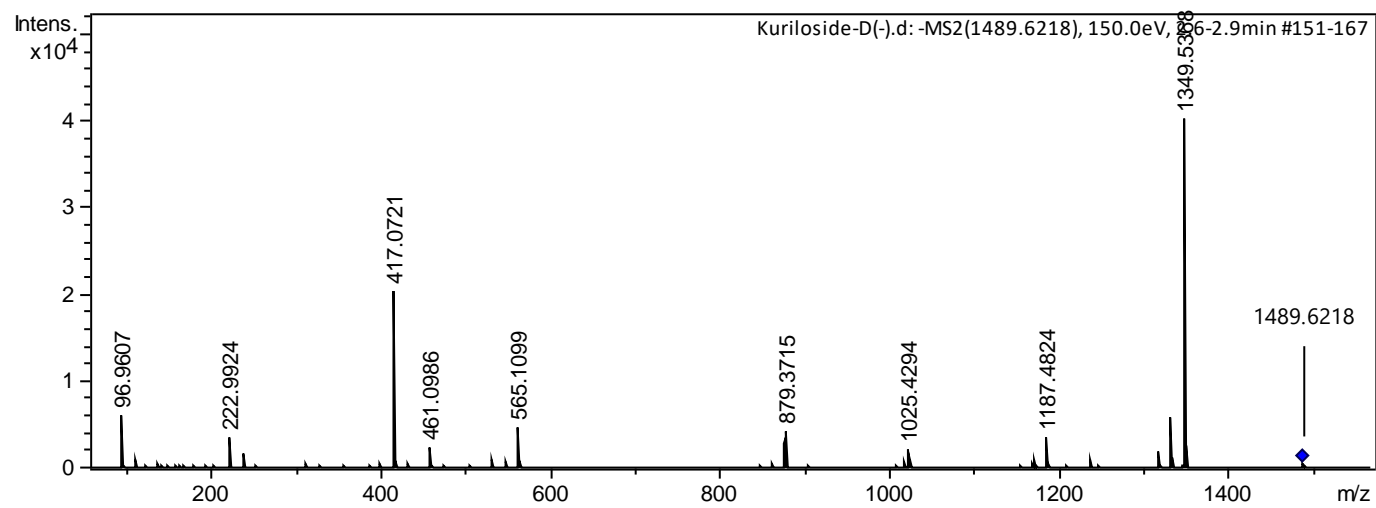

Figure S31. HR-ESI-MS and ESI-MS/MS spectra of kuriloside D (4)

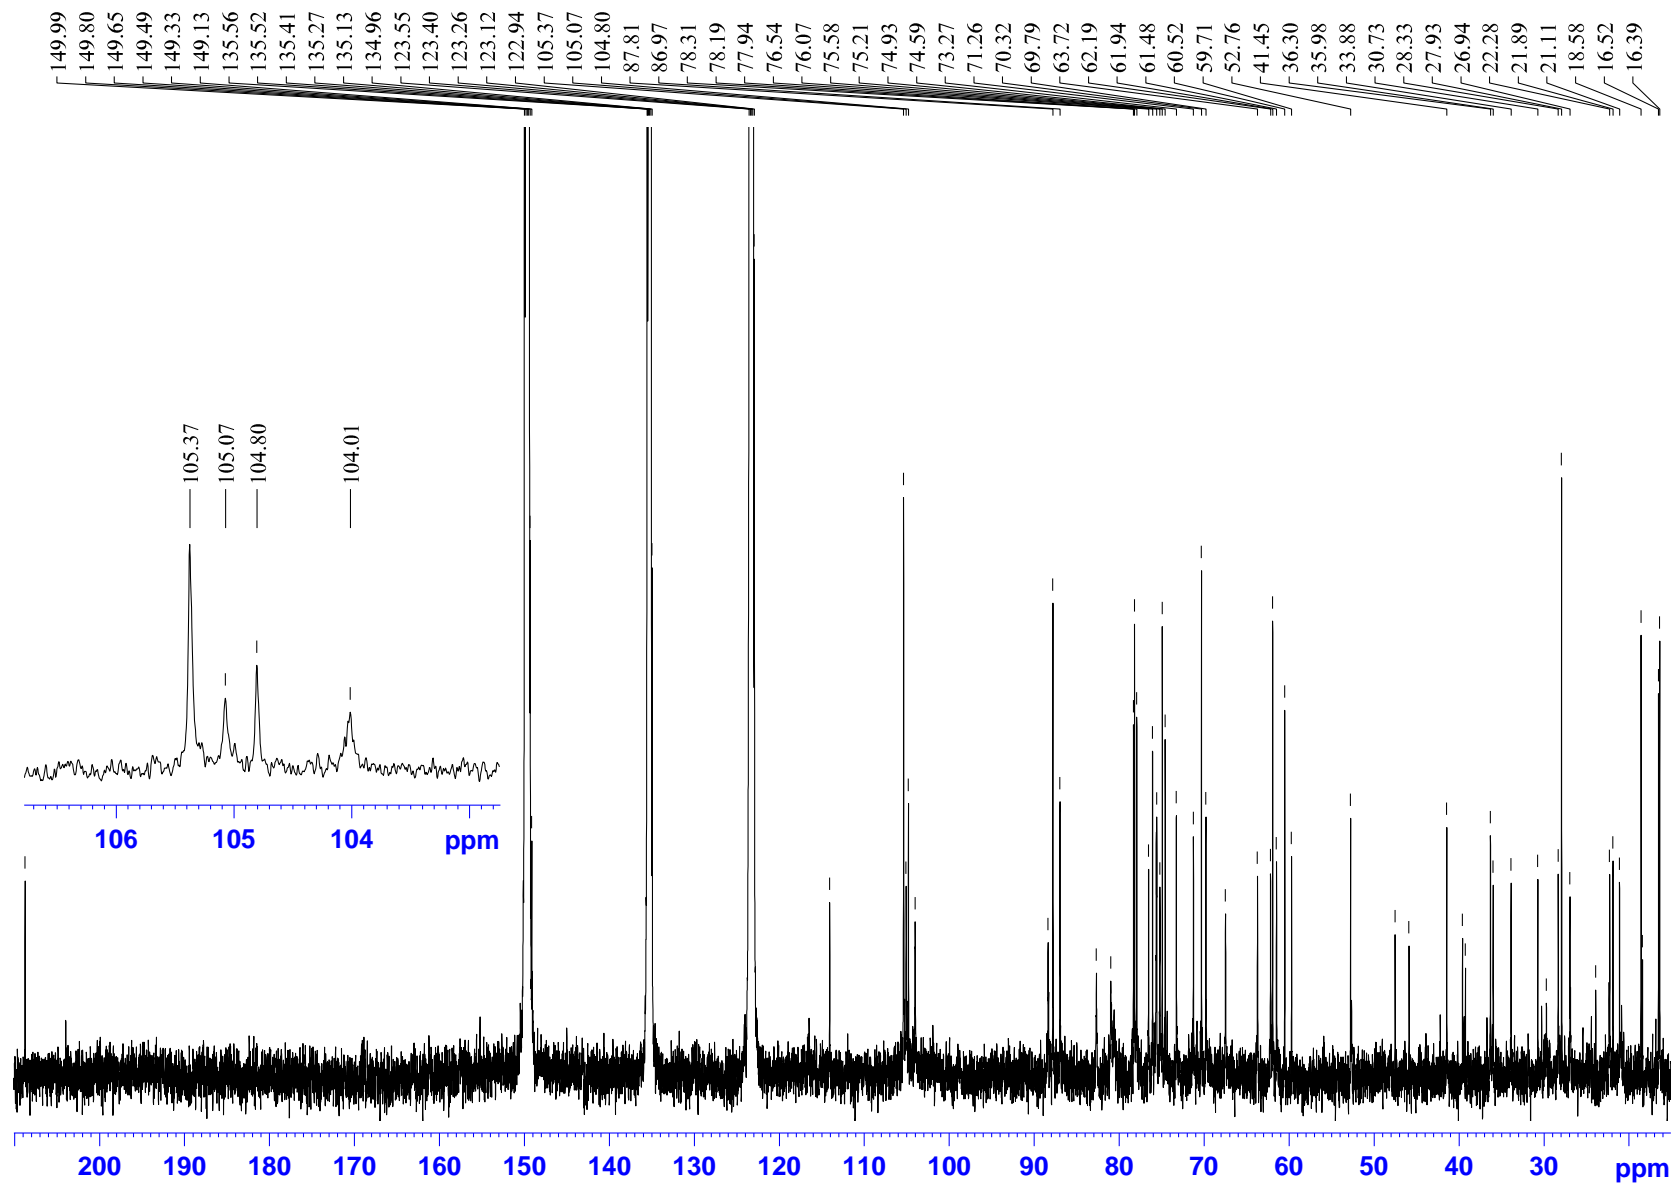

Figure S32. The  $^{13}\text{C}$  NMR (176.03 MHz) spectrum of kuriloside E (5) in  $\text{C}_5\text{D}_5\text{N}/\text{D}_2\text{O}$  (4/1)

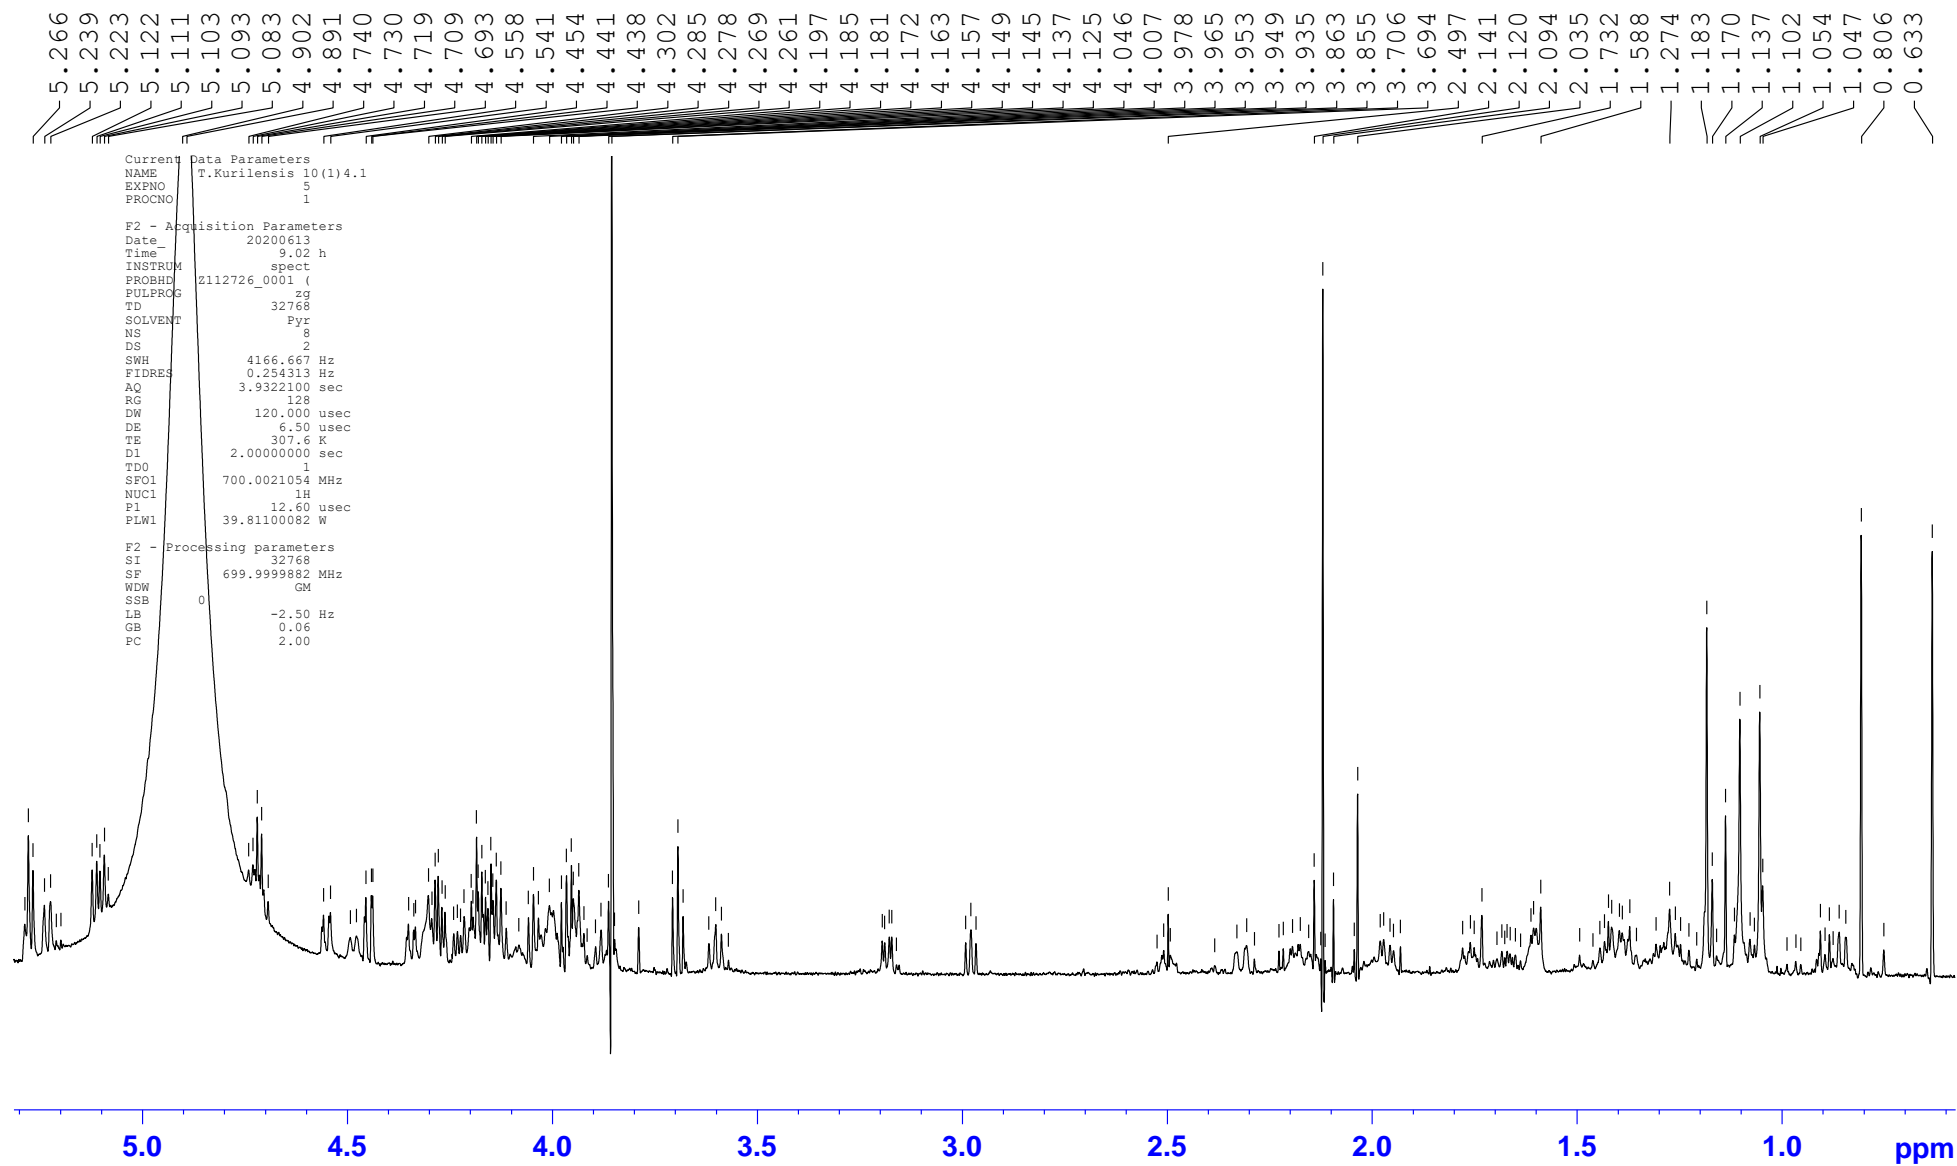

Figure S33. The  $^1\text{H}$  NMR (700.00 MHz) spectrum of kuriloside E (5) in  $\text{C}_5\text{D}_5\text{N}/\text{D}_2\text{O}$  (4/1)

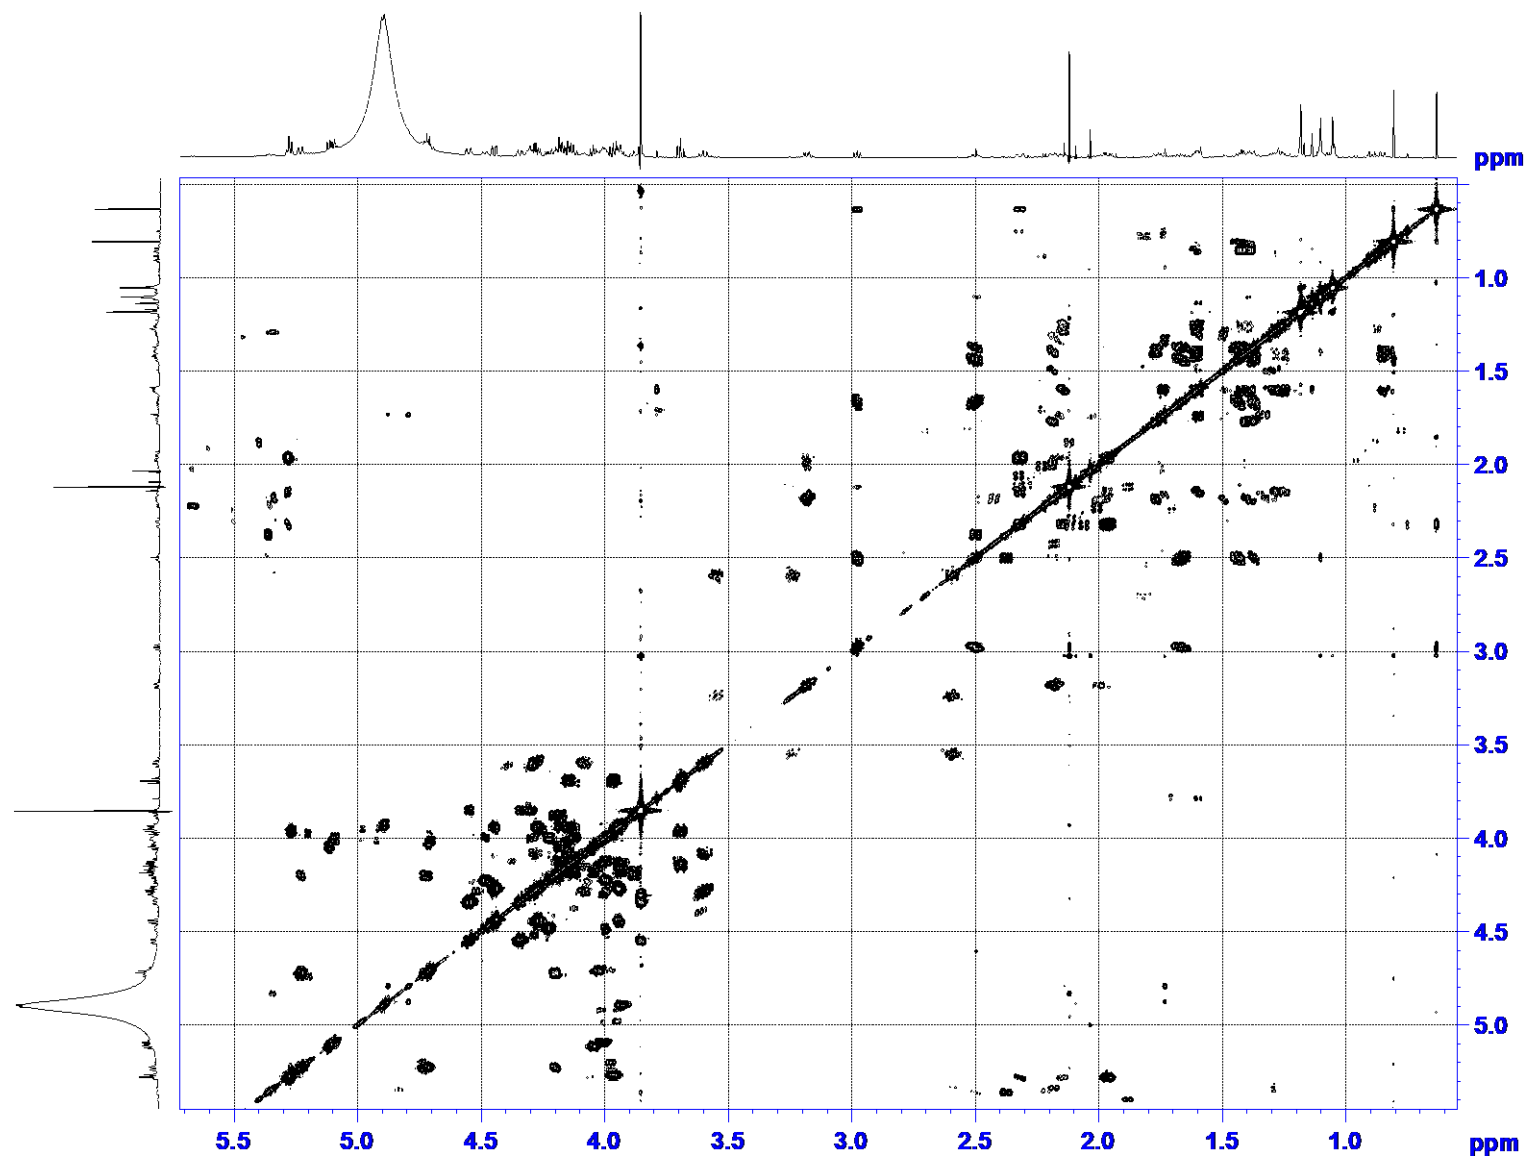

Figure S34. The COSY (700.00 MHz) spectrum of kuriloside E (5) in C<sub>5</sub>D<sub>5</sub>N/D<sub>2</sub>O (4/1)

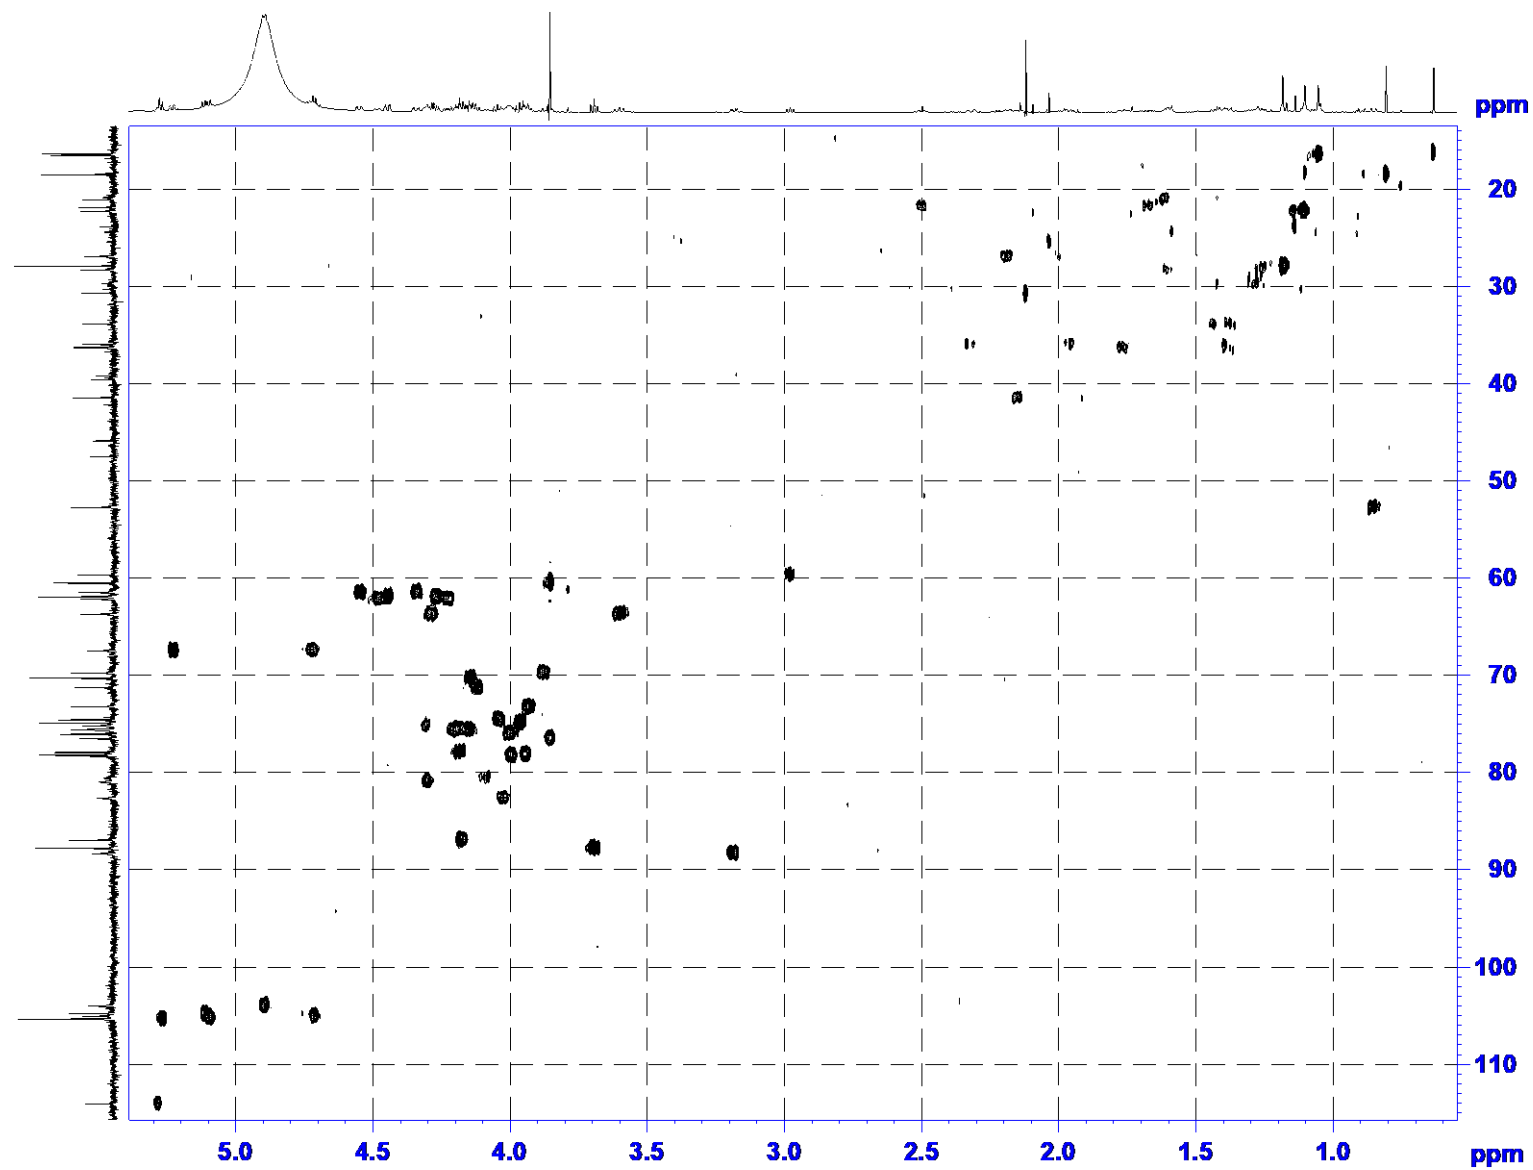

Figure S35. The HSQC (700.00 MHz) spectrum of kuriloside E (5) in  $\text{C}_5\text{D}_5\text{N}/\text{D}_2\text{O}$  (4/1)

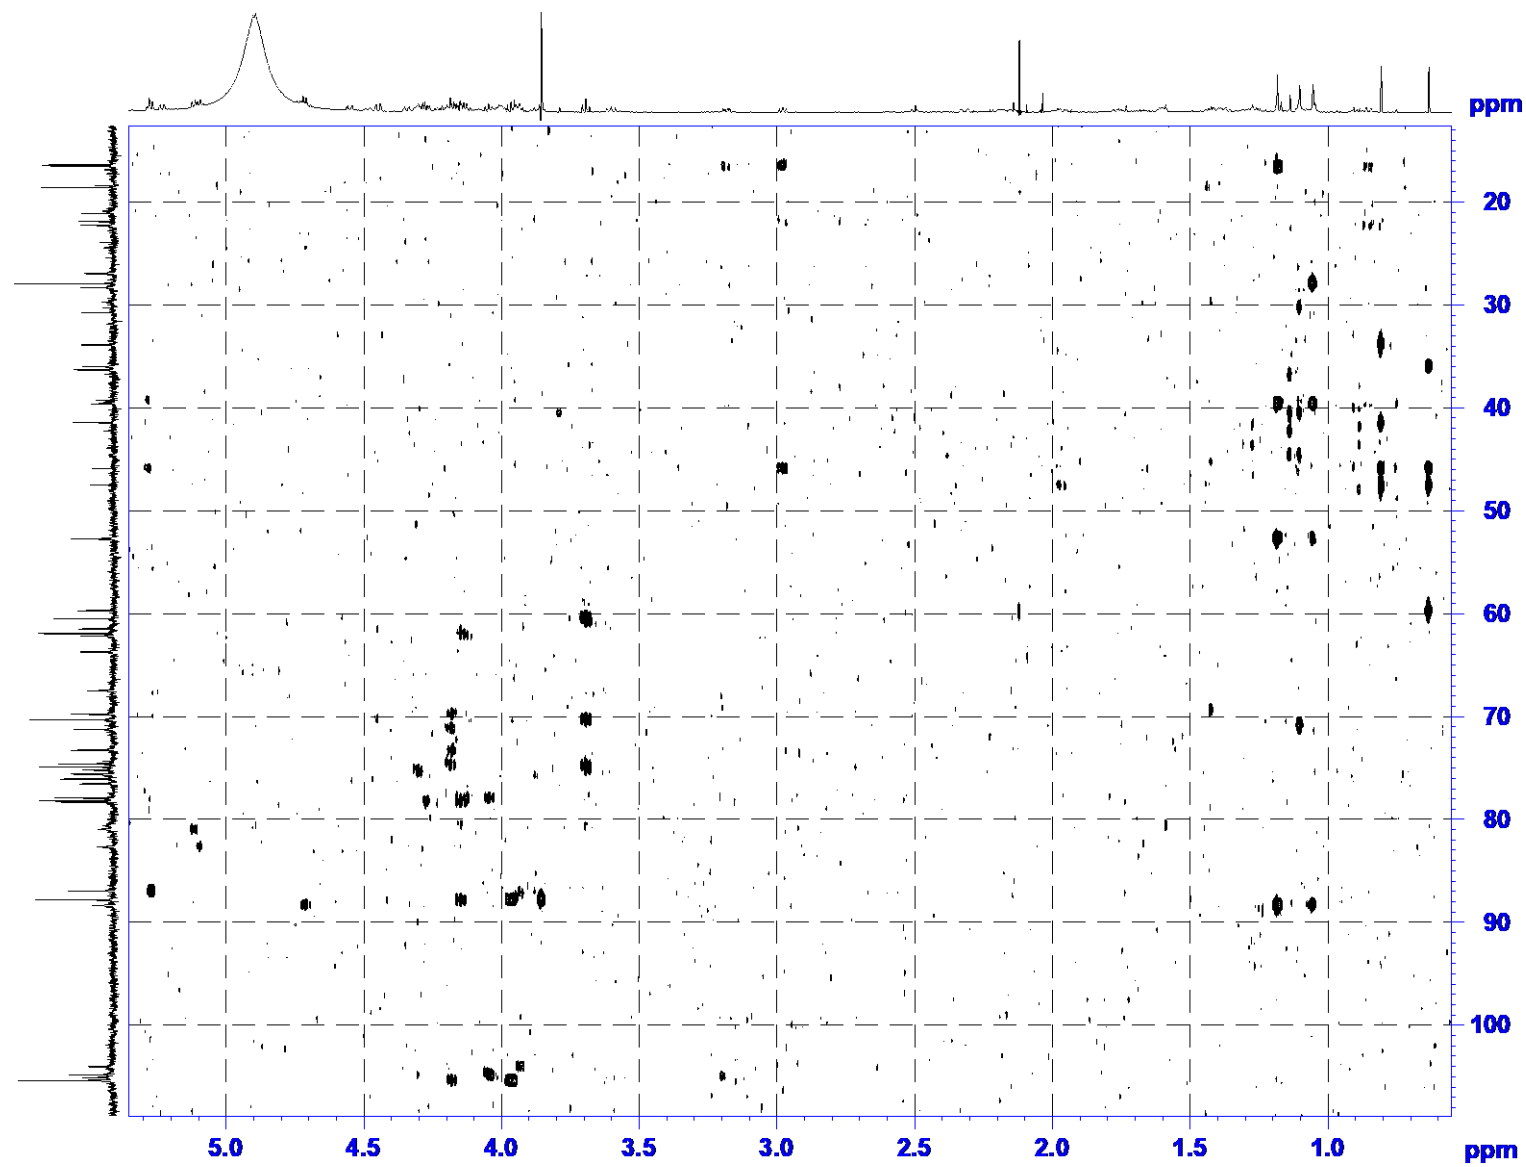

Figure S36. The HMBC (700.00 MHz) spectrum of kuriloside E (5) in  $C_5D_5N/D_2O$  (4/1)



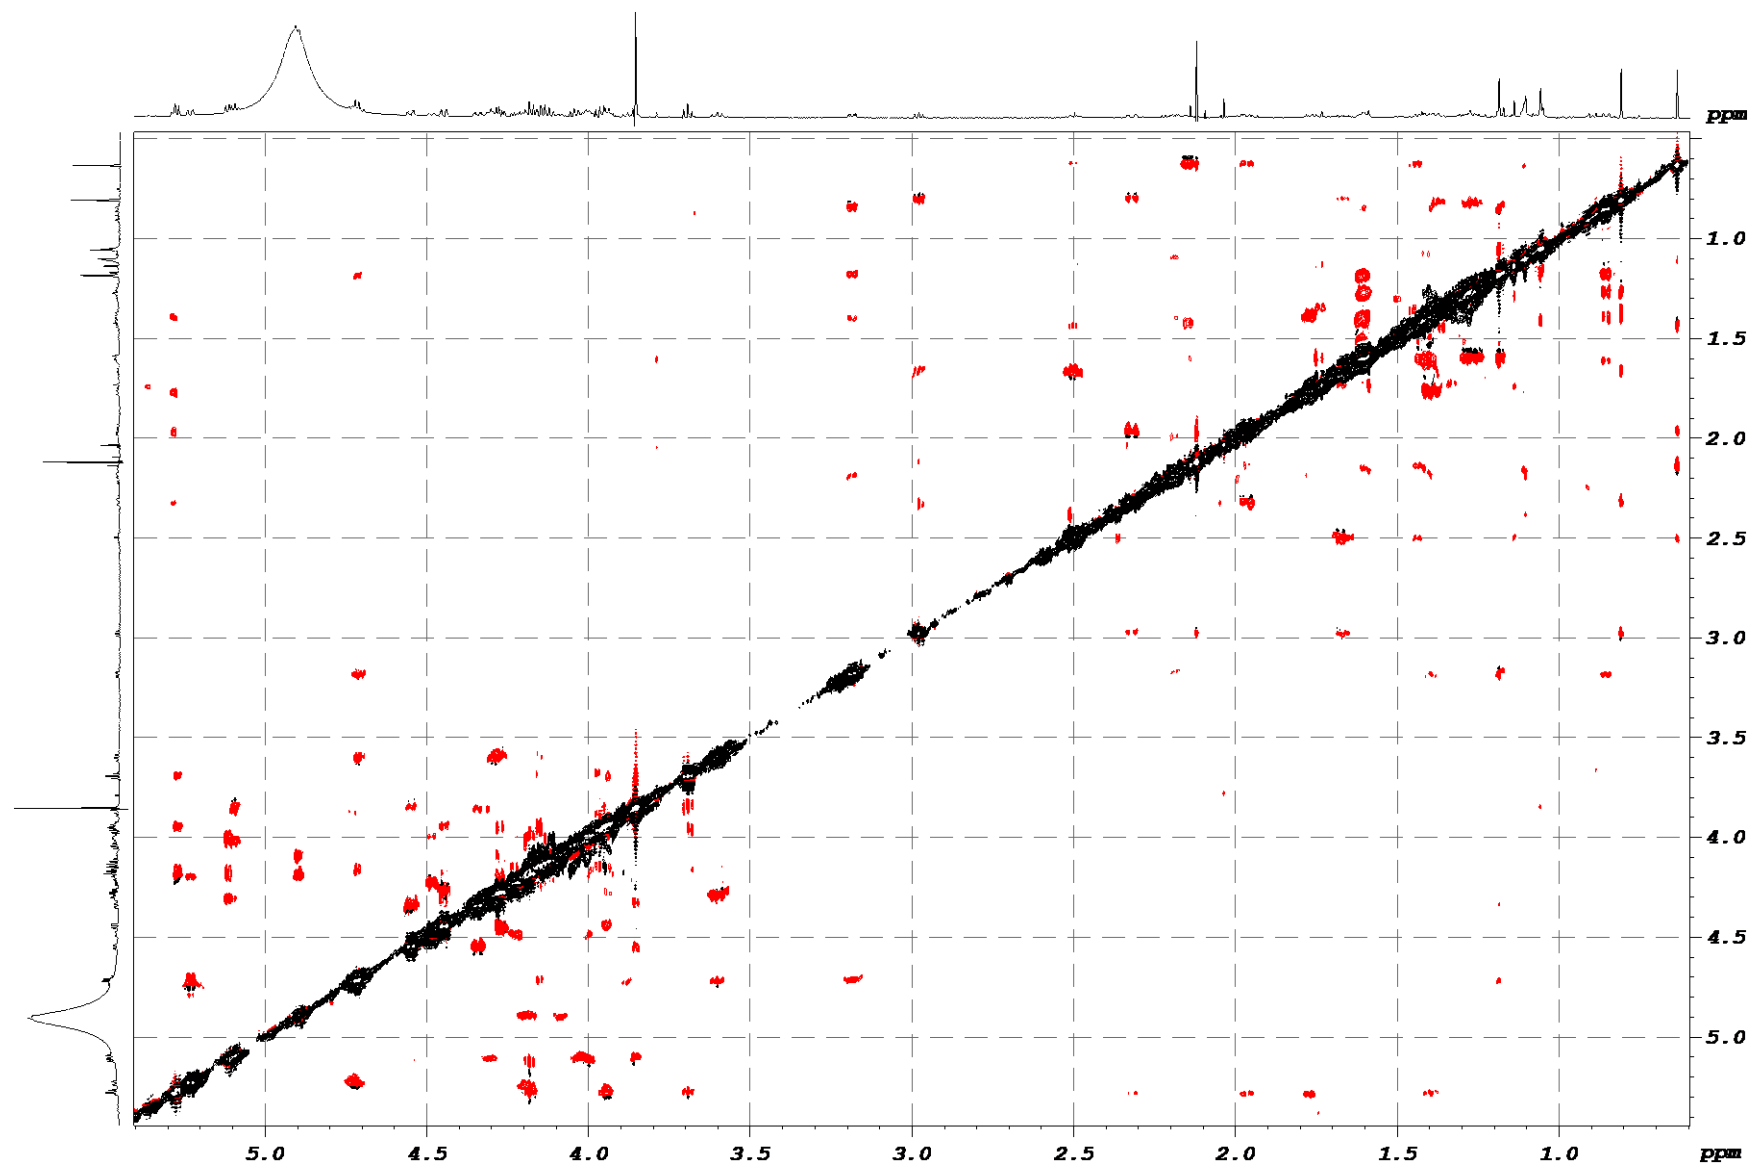

Figure S37. The ROESY (700.00 MHz) spectrum of kuriloside E (5) in C<sub>5</sub>D<sub>5</sub>N/D<sub>2</sub>O (4/1)

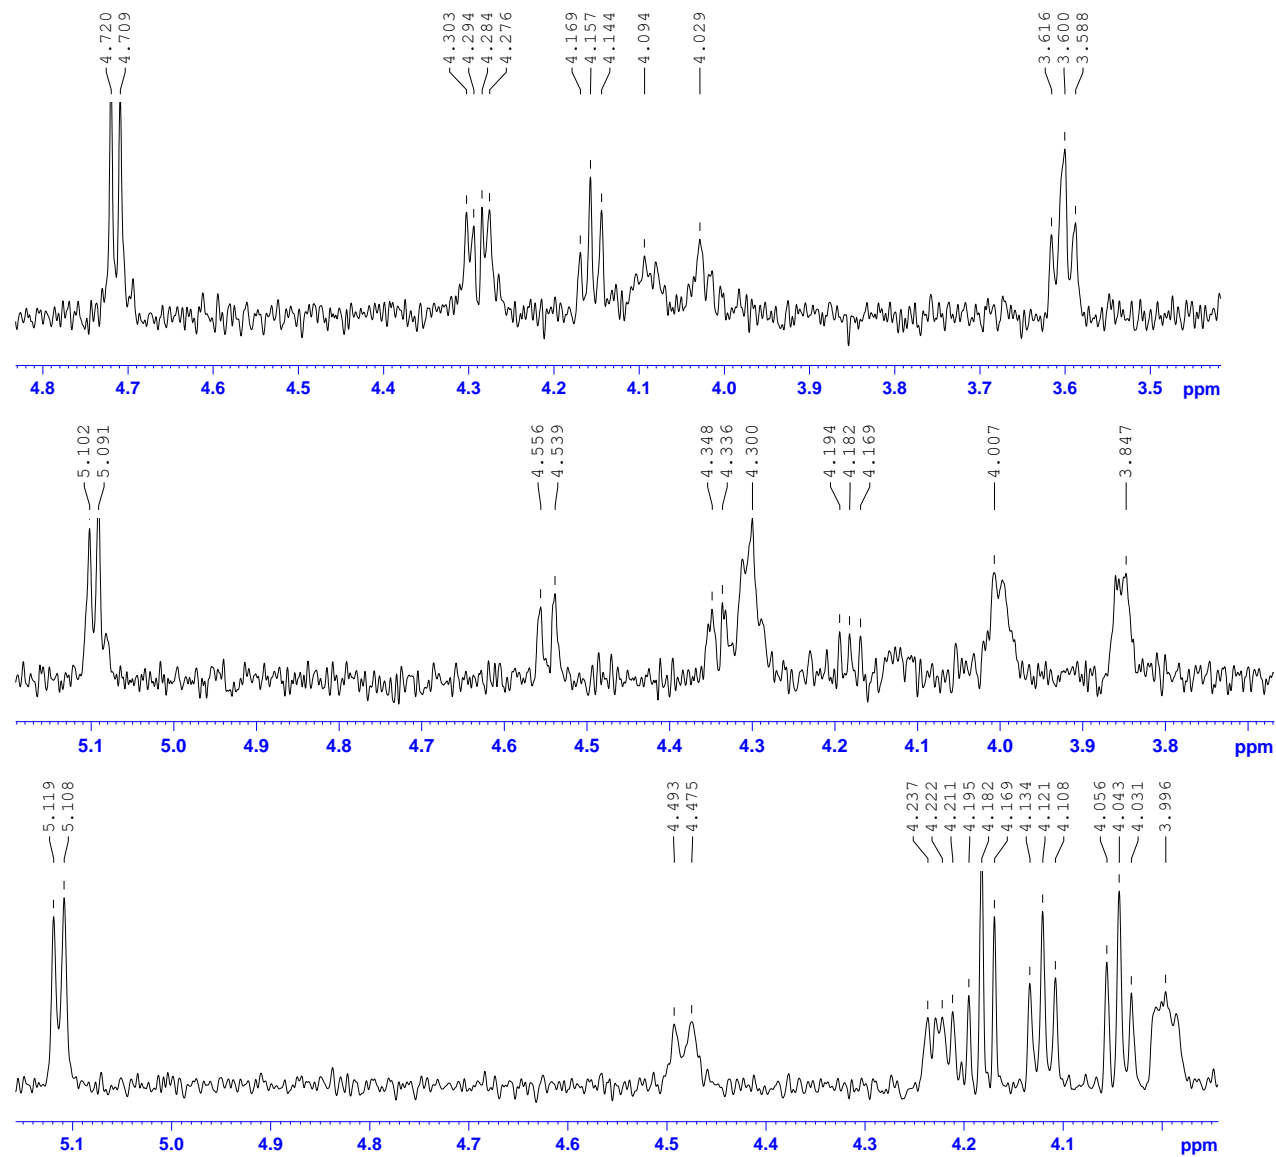

Figure S38. 1D TOCSY (700.00 MHz) spectra of kurilose E (5) in C<sub>5</sub>D<sub>5</sub>N/D<sub>2</sub>O (4/1)

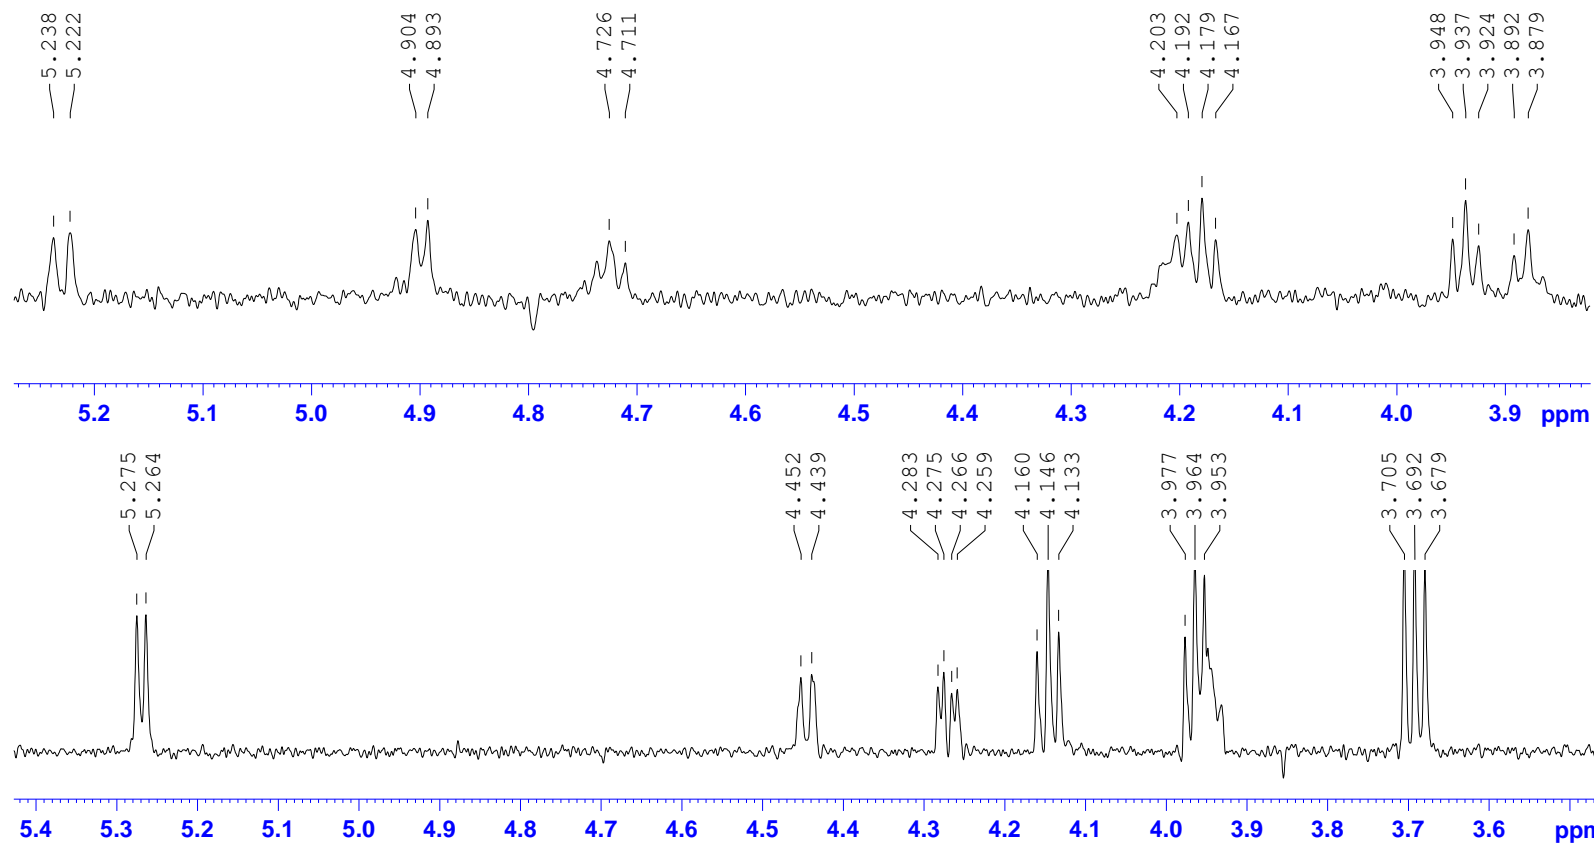

Figure S39. 1D TOCSY (700.00 MHz) spectra of kuriloside E (5) in C<sub>5</sub>D<sub>5</sub>N/D<sub>2</sub>O (4/1)

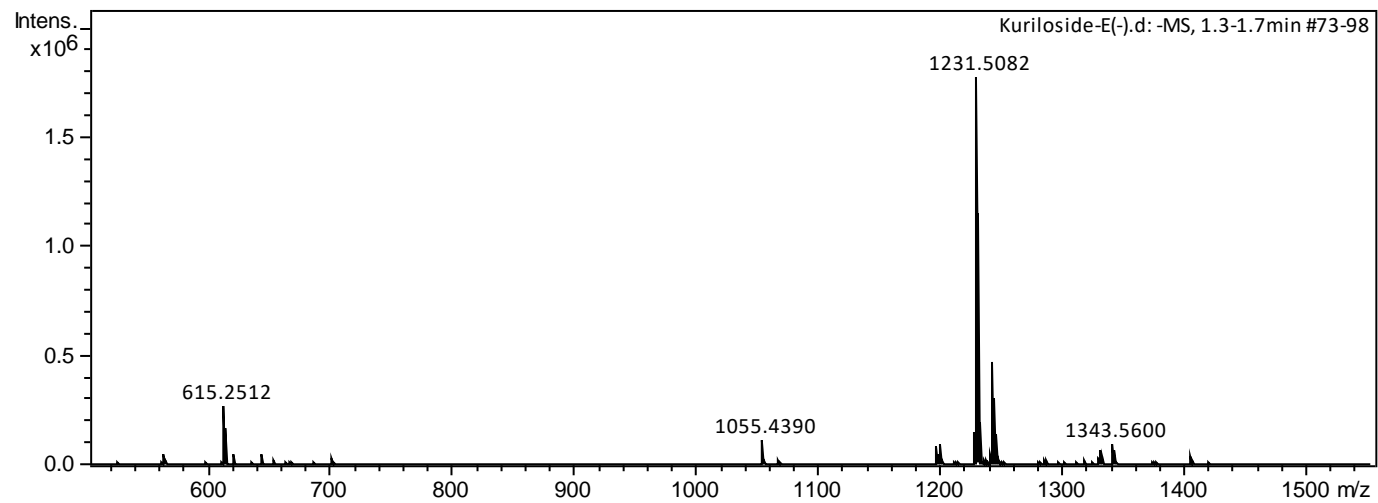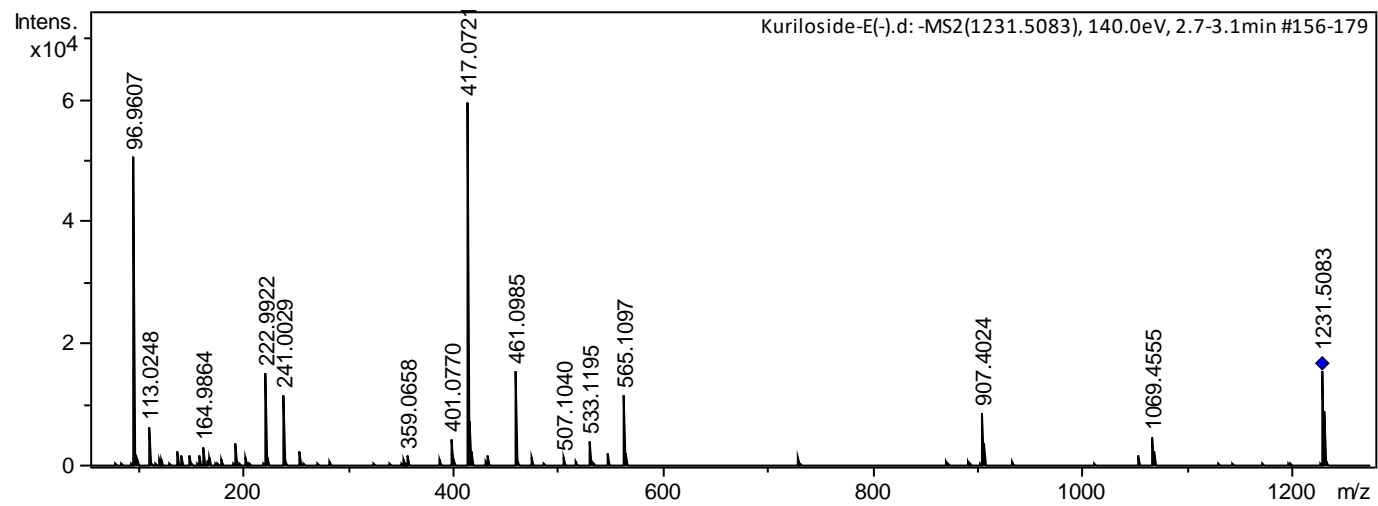

Figure S40. HR-ESI-MS and ESI-MS/MS spectra of kurilosite E (5)

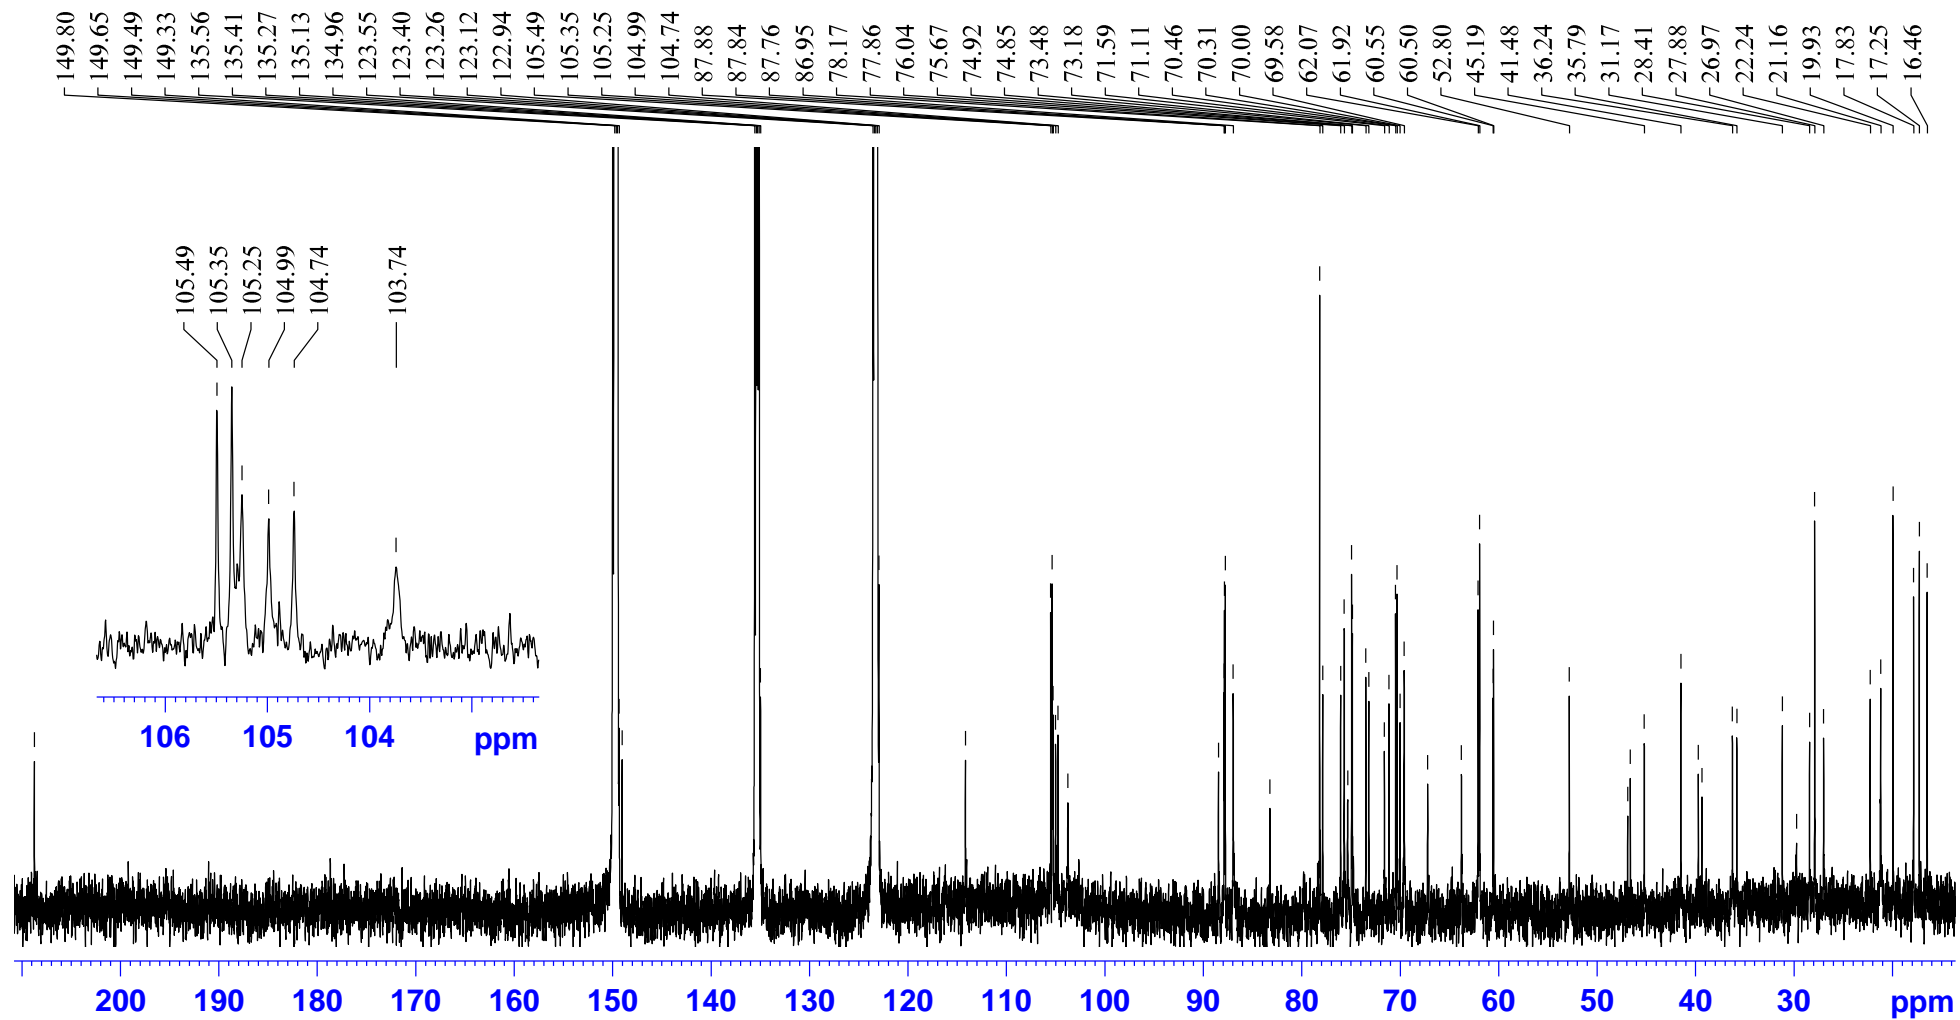

Figure S41. The  $^{13}\text{C}$  NMR (176.03 MHz) spectrum of kuriloside F (**6**) in  $\text{C}_5\text{D}_5\text{N}/\text{D}_2\text{O}$  (4/1)

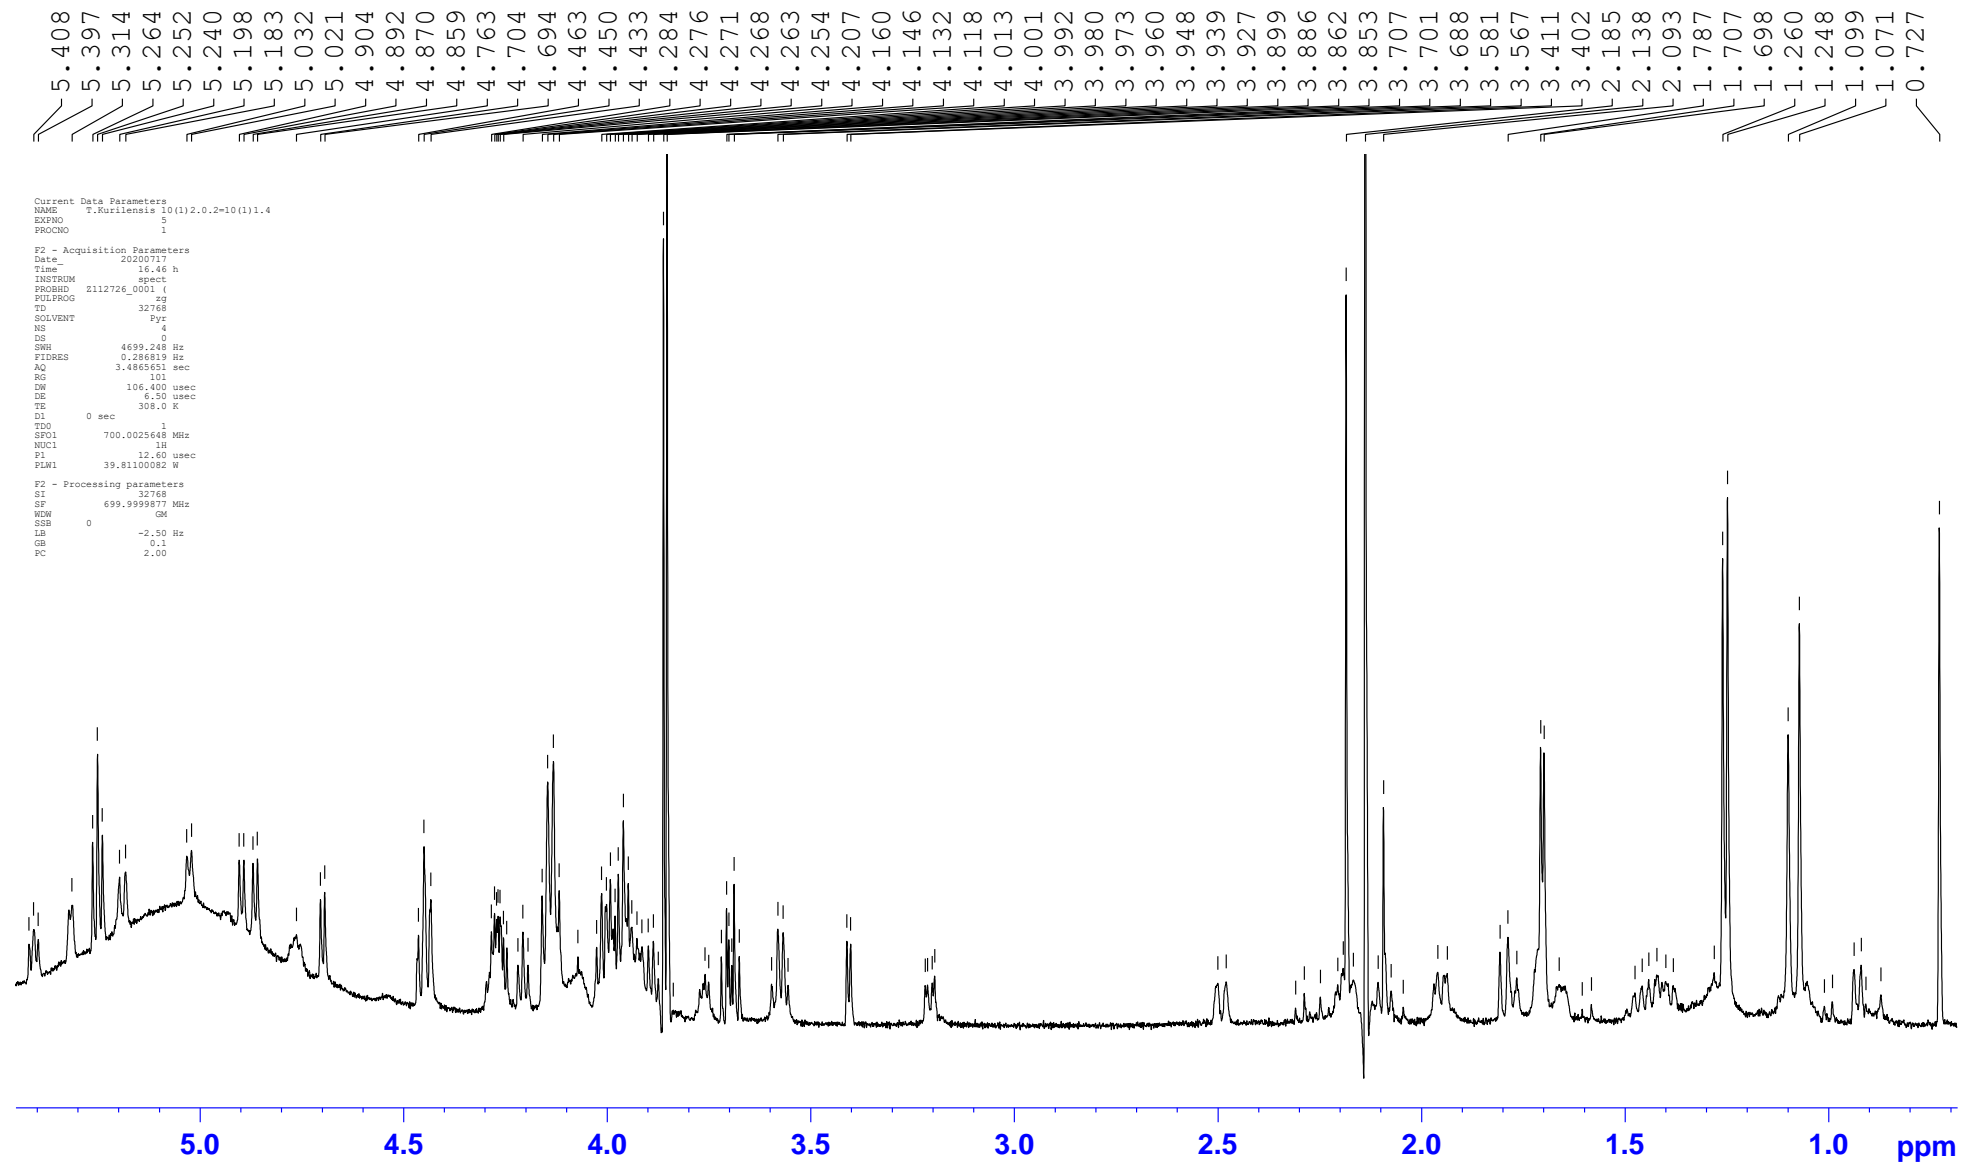

Figure S42. The  $^1\text{H}$  NMR (700.00 MHz) spectrum of kurilaside F (6) in  $\text{C}_5\text{D}_5\text{N}/\text{D}_2\text{O}$  (4/1)

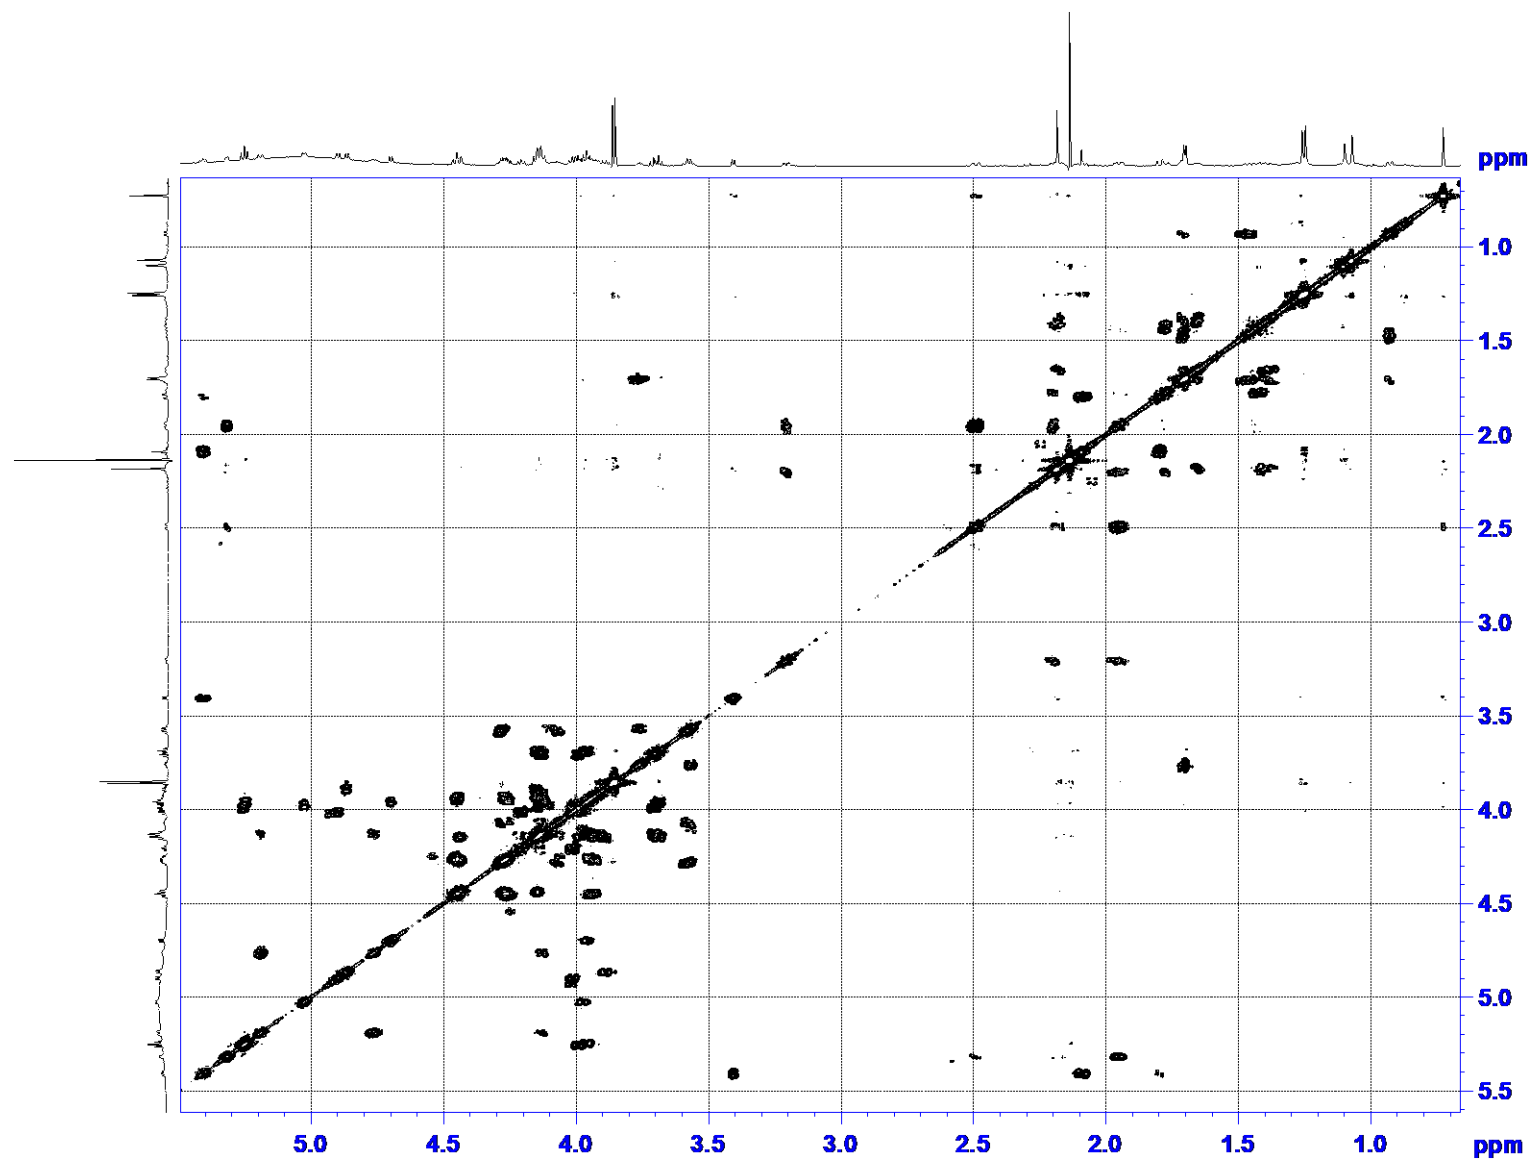

Figure S43. The COSY (700.00 MHz) spectrum of kuriloside F (6) in  $C_5D_5N/D_2O$  (4/1)

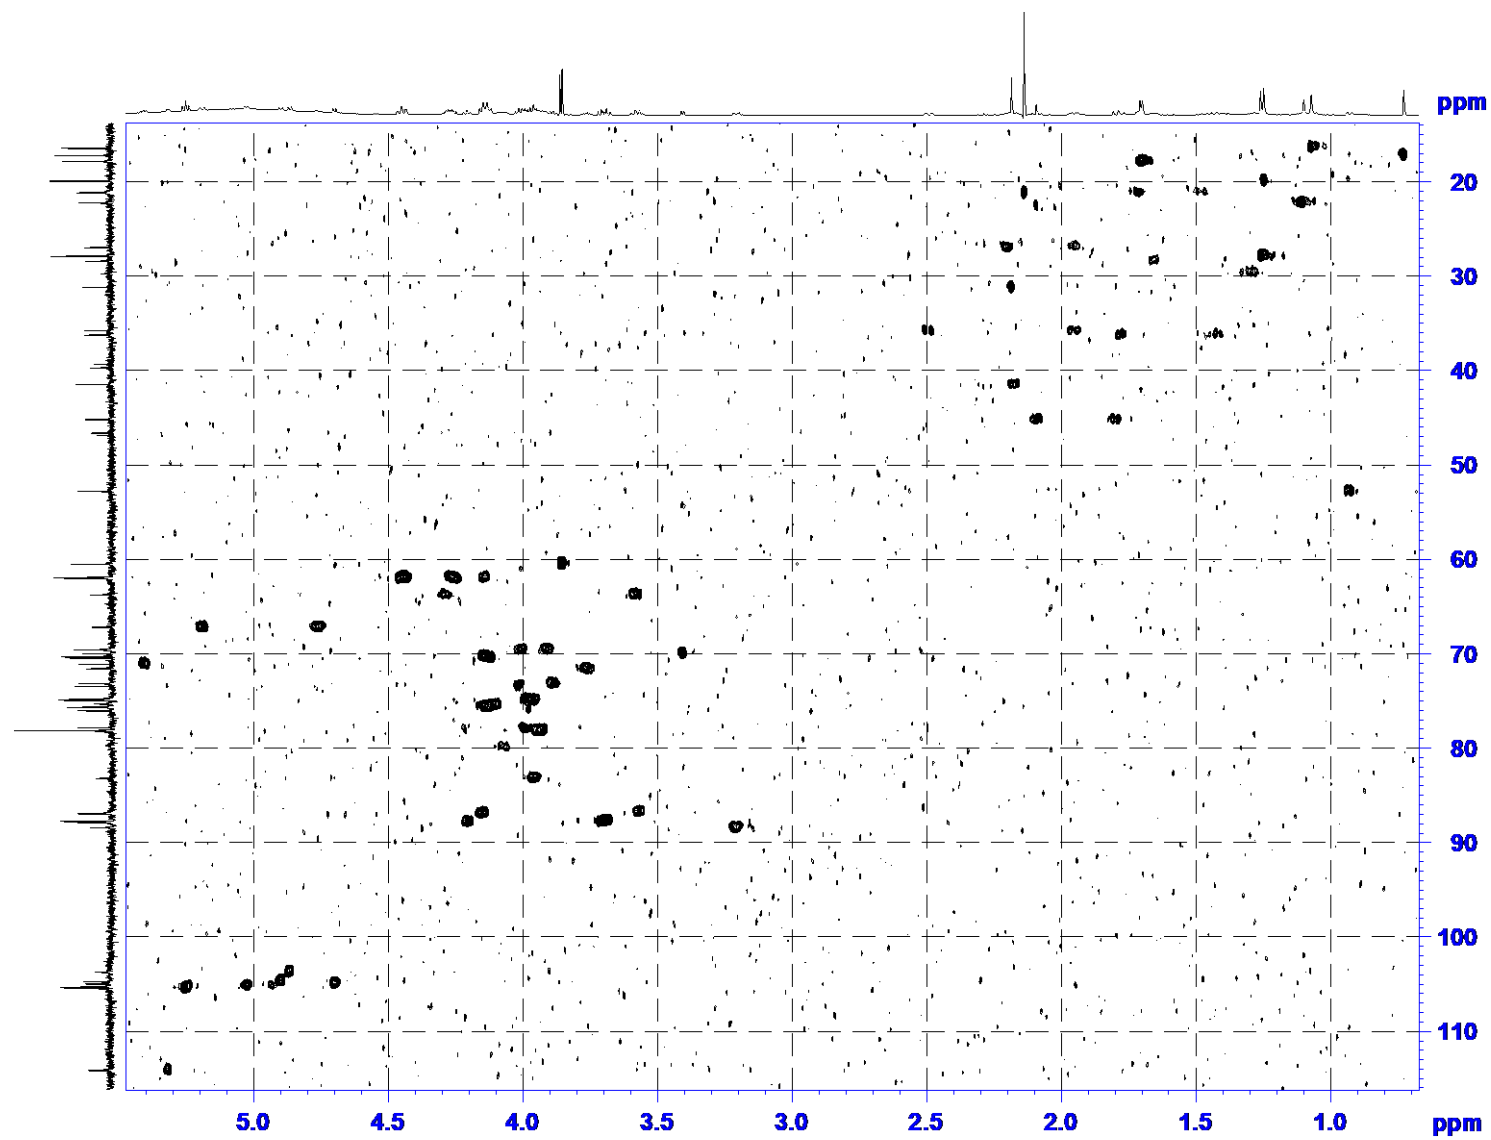

Figure S44. The HSQC (700.00 MHz) spectrum of kuriloside F (6) in  $\text{C}_5\text{D}_5\text{N}/\text{D}_2\text{O}$  (4/1)



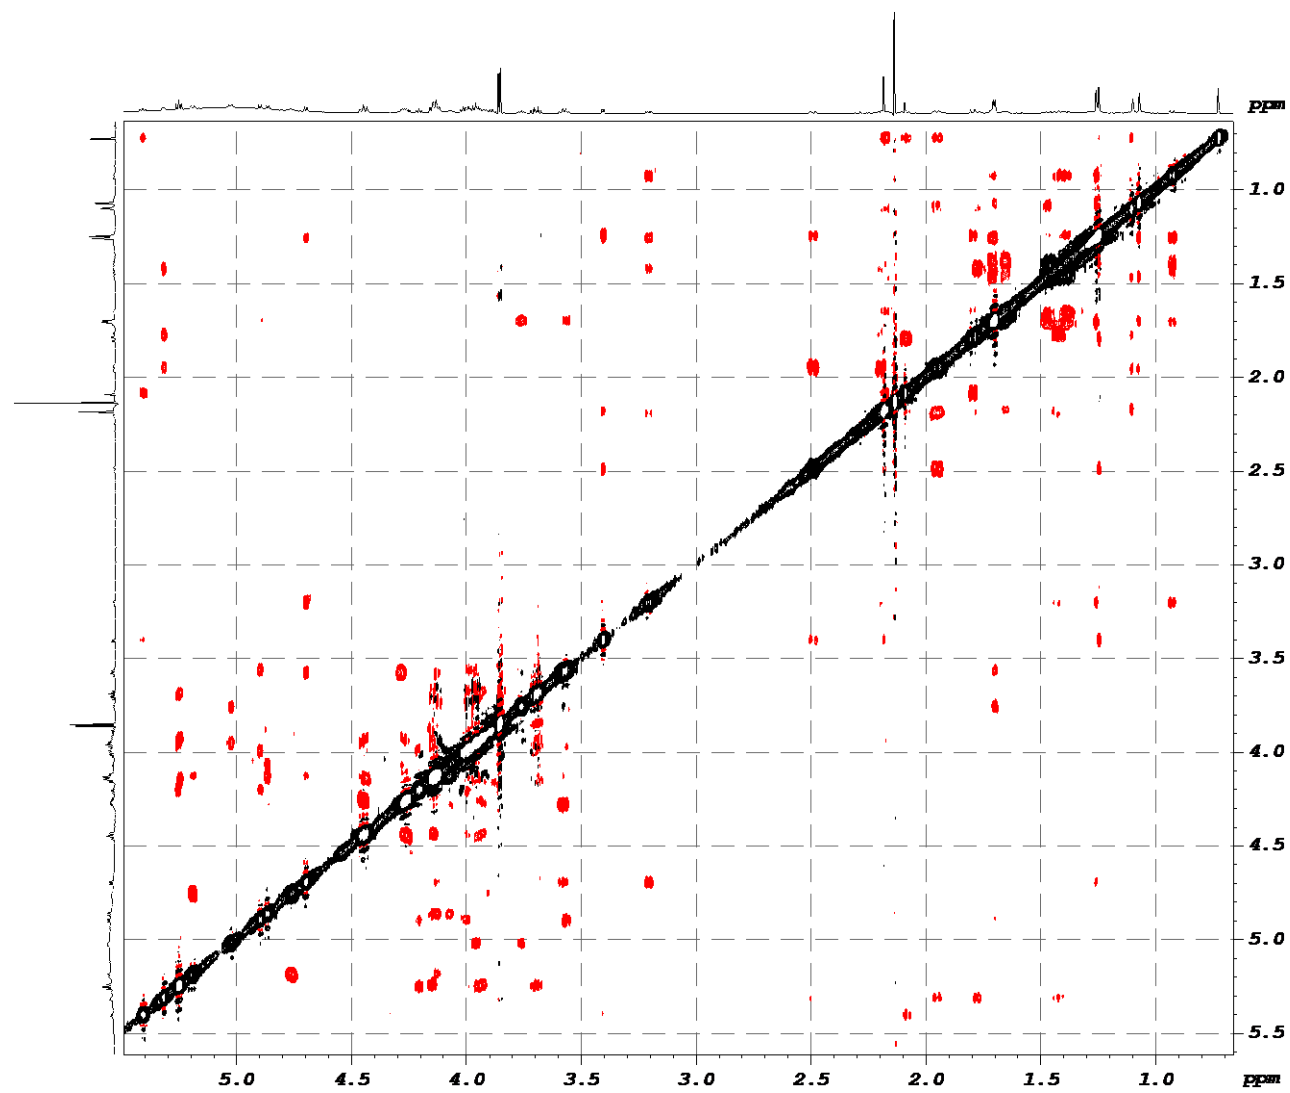

Figure S45. The ROESY (700.00 MHz) spectrum of kuriloside F (**6**) in C<sub>5</sub>D<sub>5</sub>N/D<sub>2</sub>O (4/1)

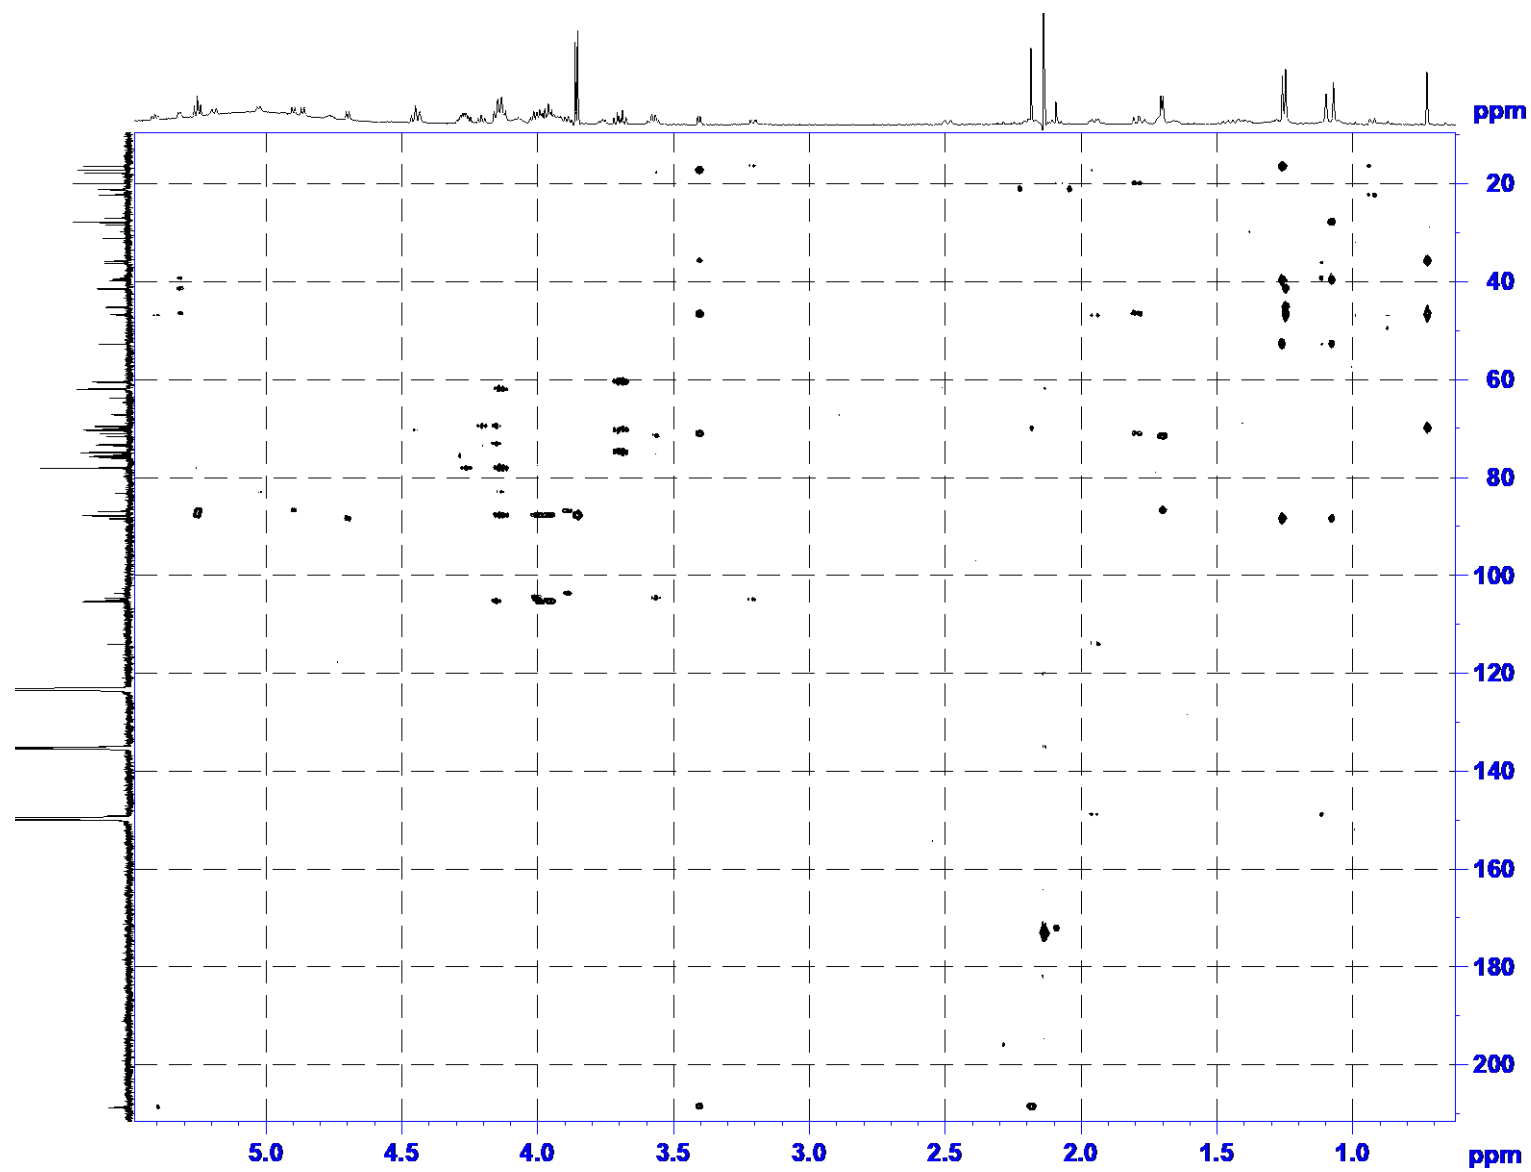

Figure S46. The HMBC (700.00 MHz) spectrum of kuriloside F (6) in  $C_5D_5N/D_2O$  (4/1)

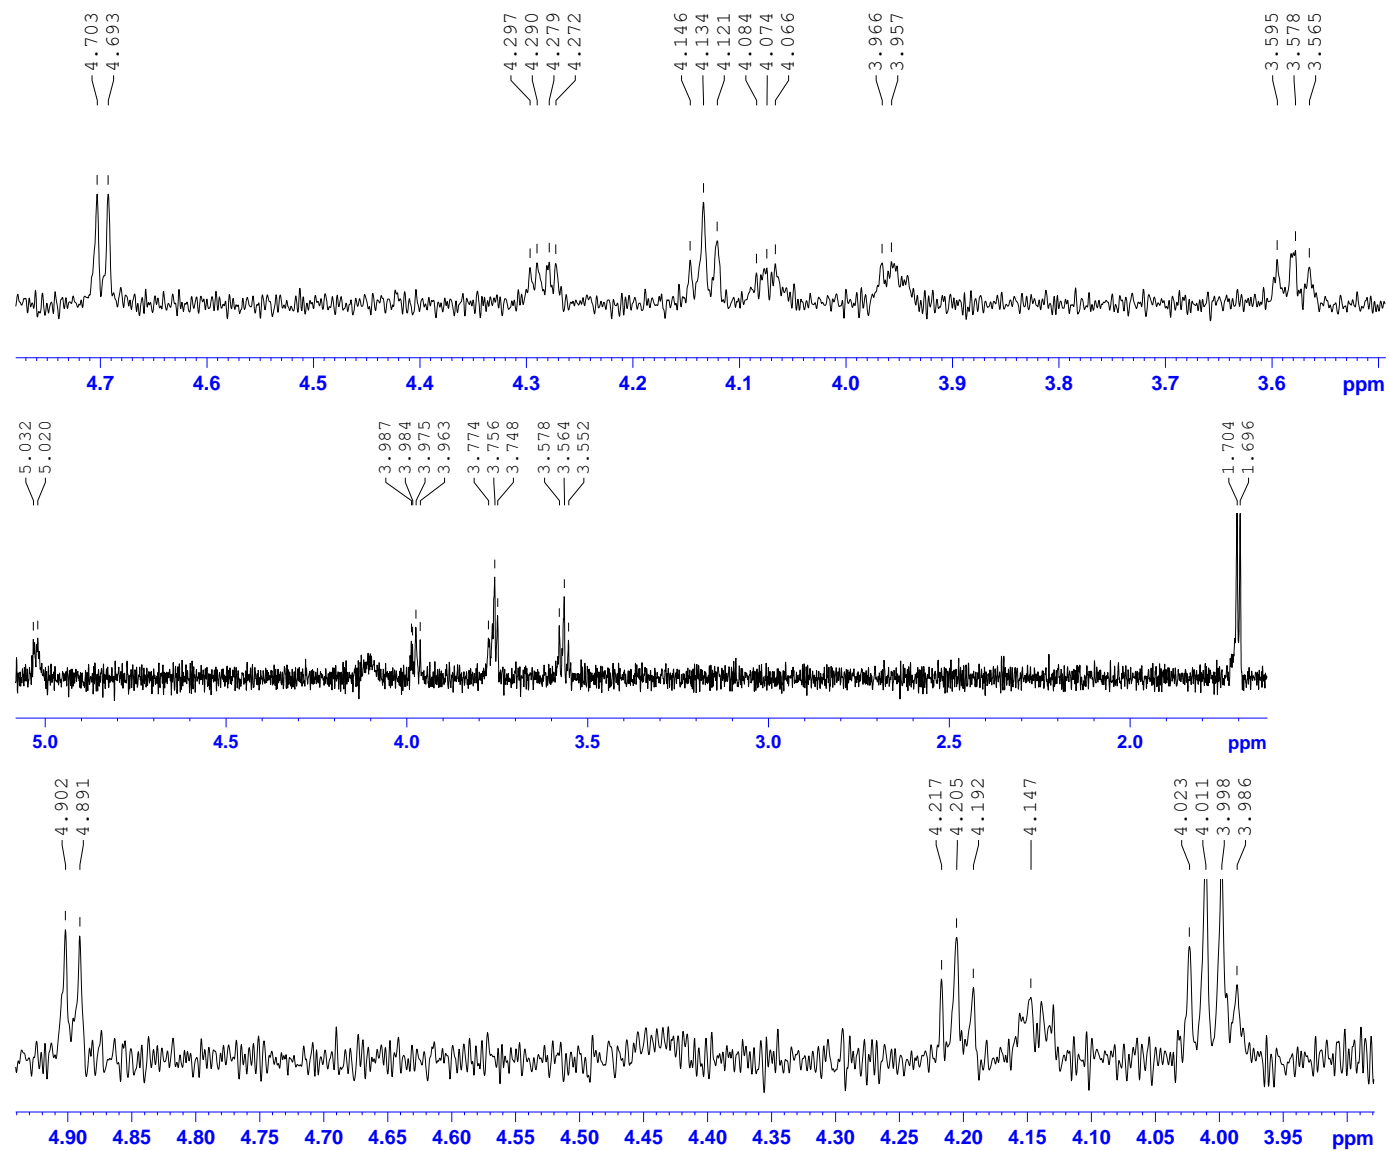

Figure S47. 1D TOCSY (700.00 MHz) spectra of the carbohydrate part of kuriloside F (6) in C<sub>5</sub>D<sub>5</sub>N/D<sub>2</sub>O (4/1)

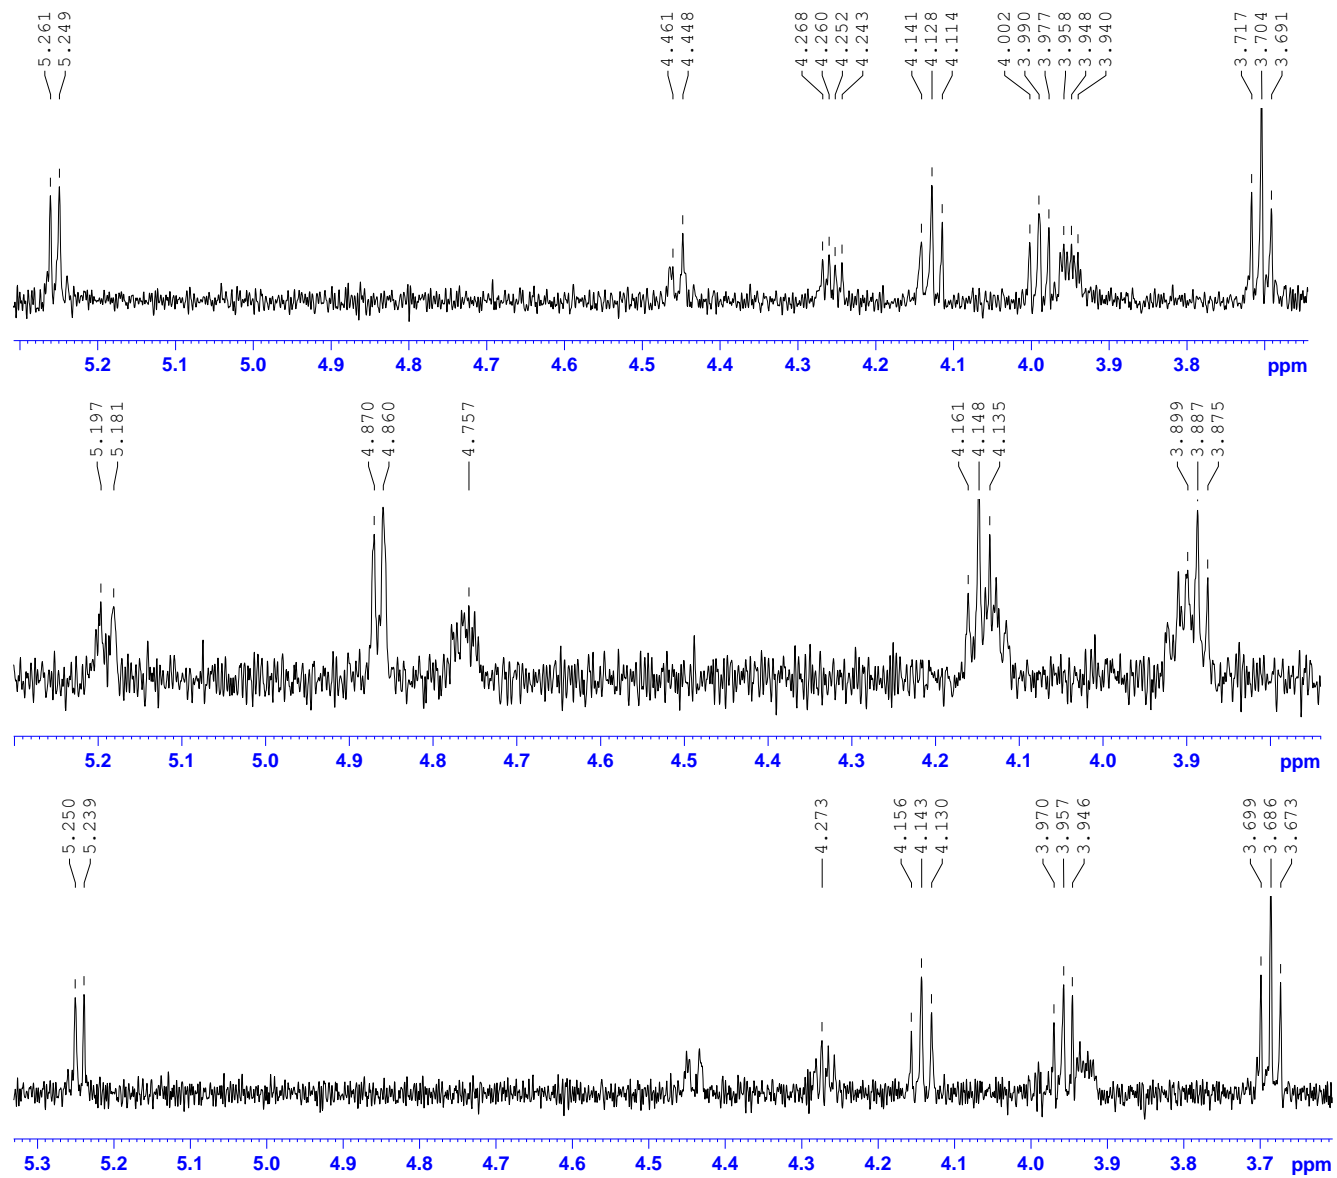

Figure S48. 1D TOCSY (700.00 MHz) spectra of the carbohydrate part of kuriloside F (**6**) in  $C_5D_5N/D_2O$  (4/1)

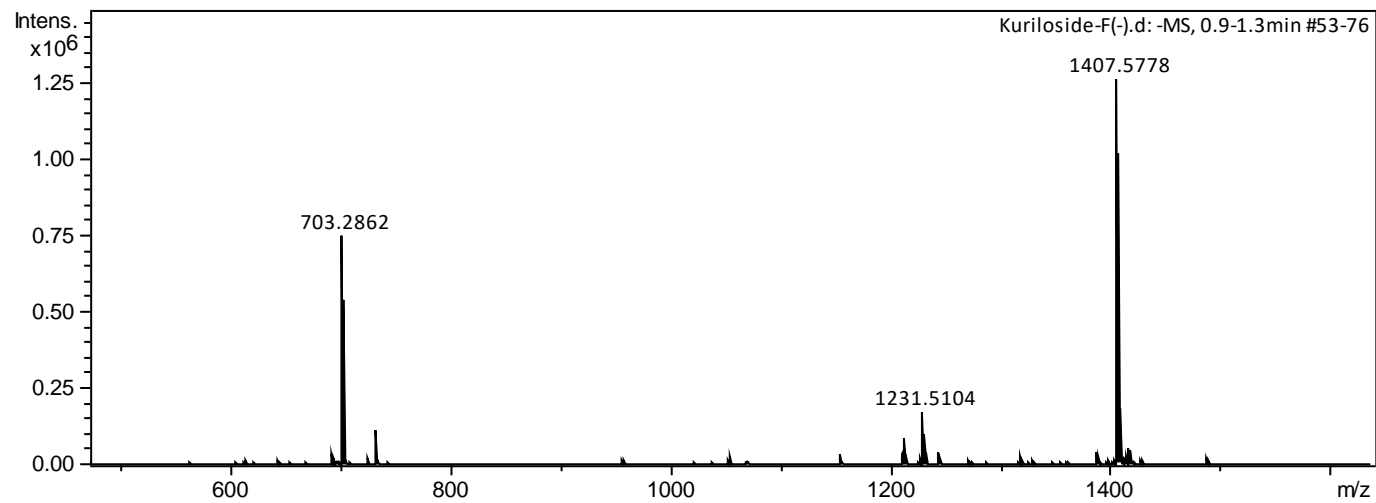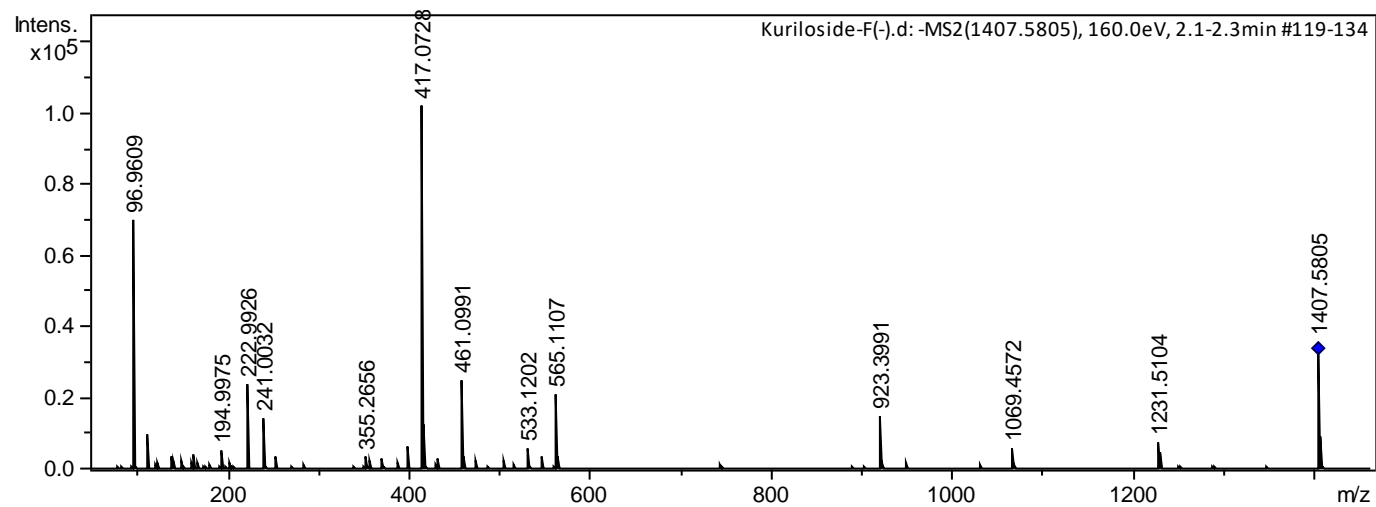

Figure S49. HR-ESI-MS and ESI-MS/MS spectra of kurilosite F (6)

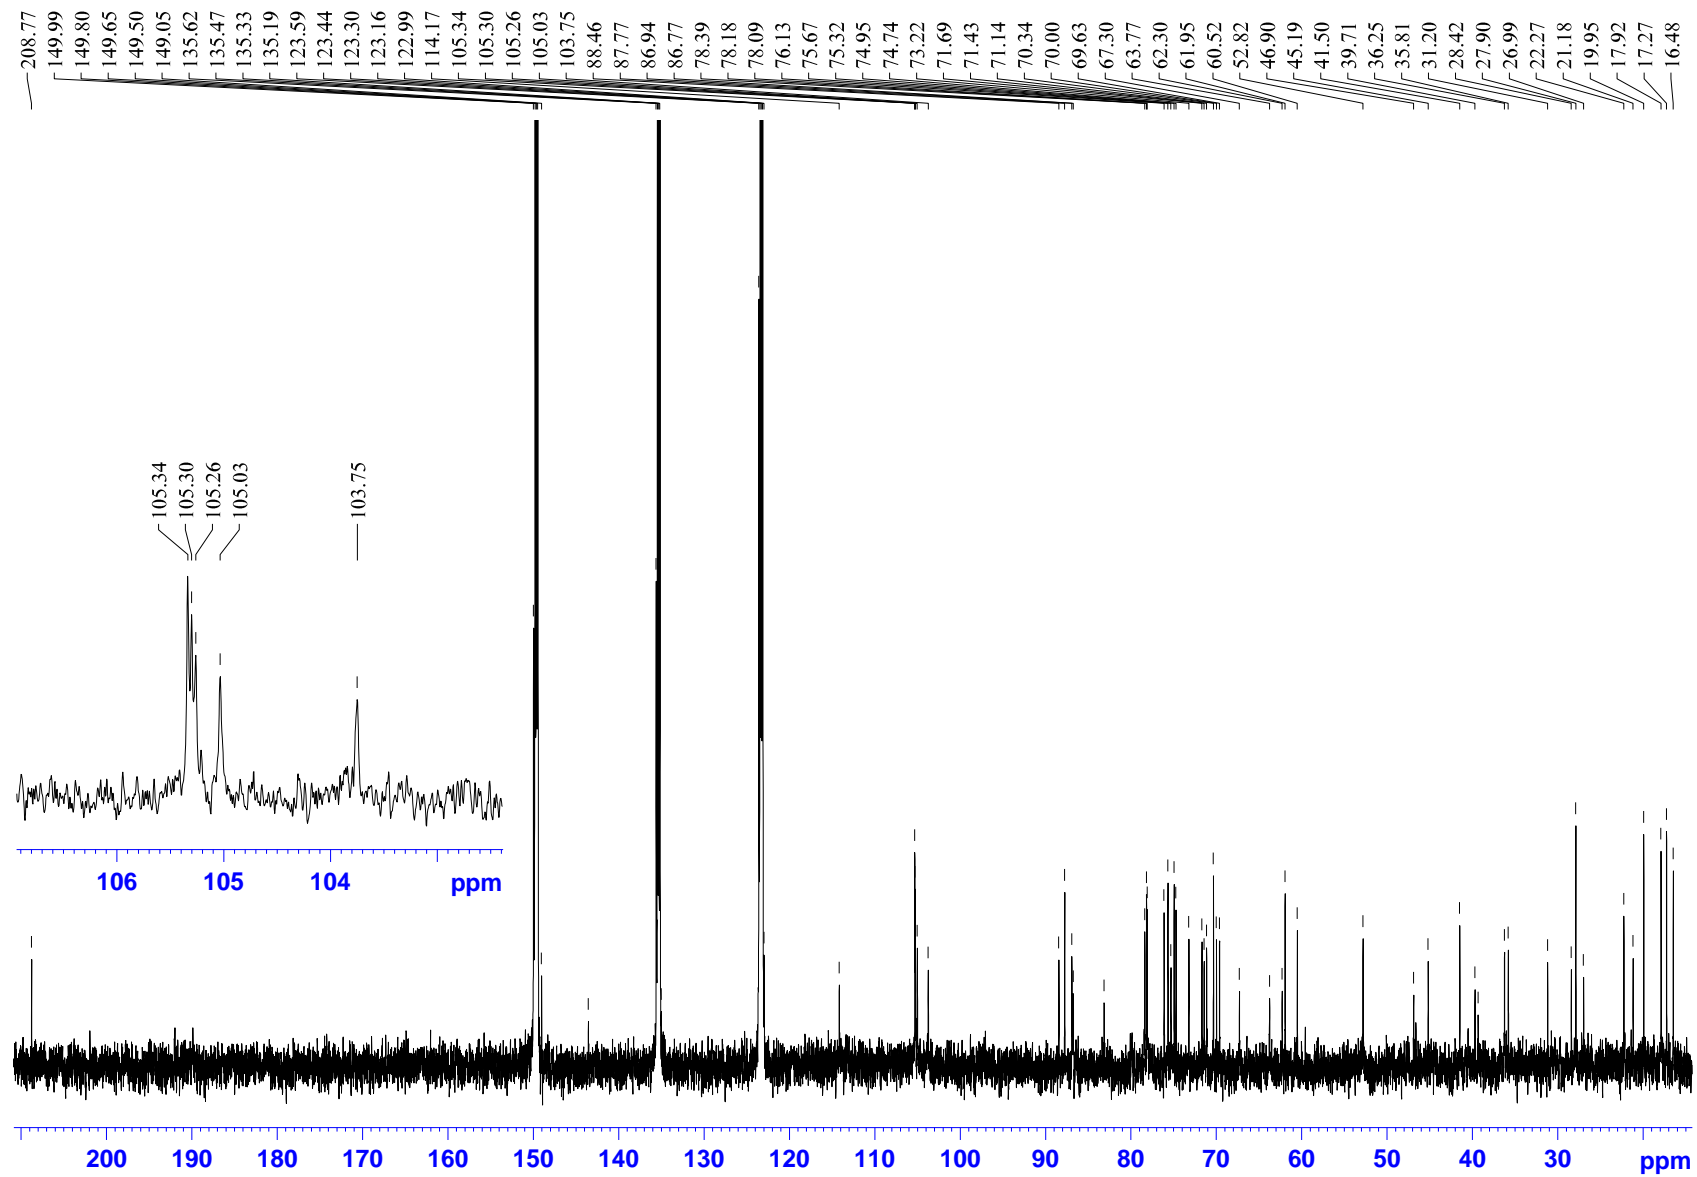

Figure S50. The  $^{13}\text{C}$  NMR (176.03 MHz) spectrum of kuriloside A (7) in  $\text{C}_5\text{D}_5\text{N}/\text{D}_2\text{O}$  (4/1)

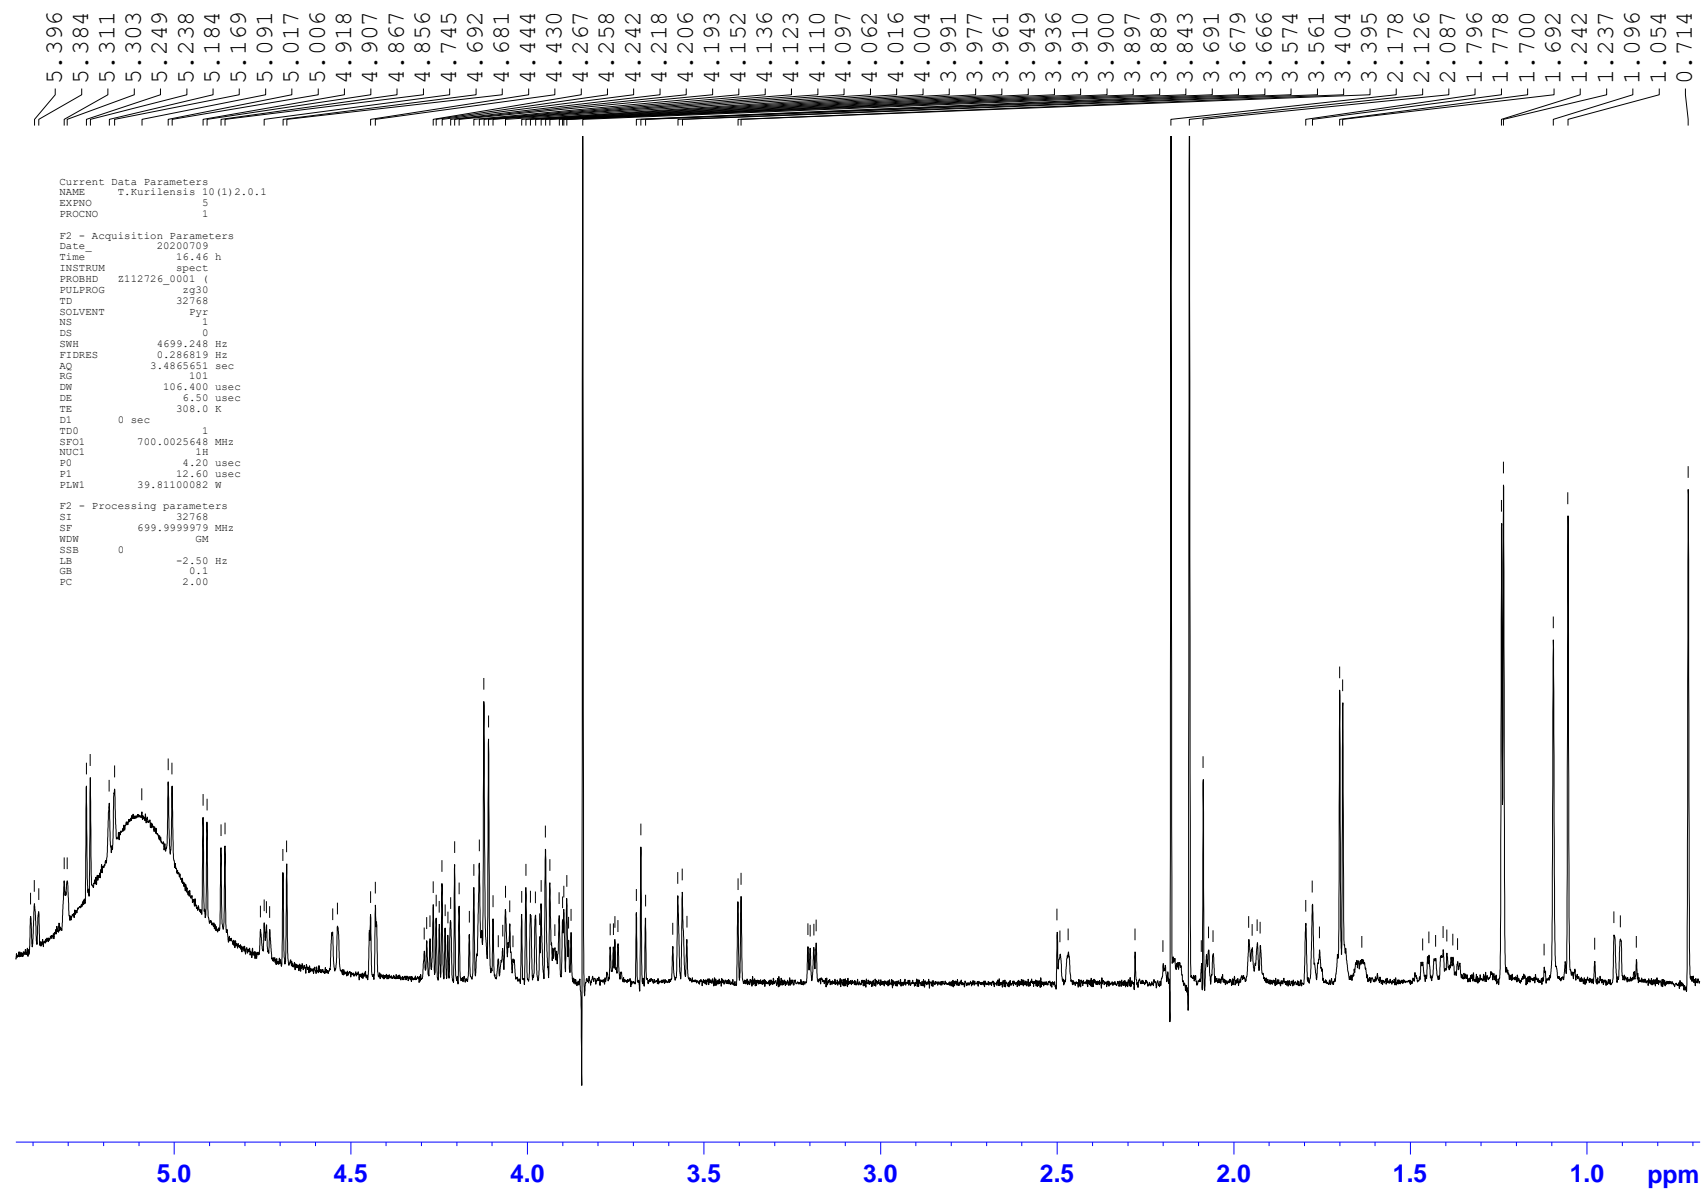

Figure S51. The  $^1\text{H}$  NMR (700.00 MHz) spectrum of kuriloside A (**7**) in  $\text{C}_5\text{D}_5\text{N}/\text{D}_2\text{O}$  (4/1)

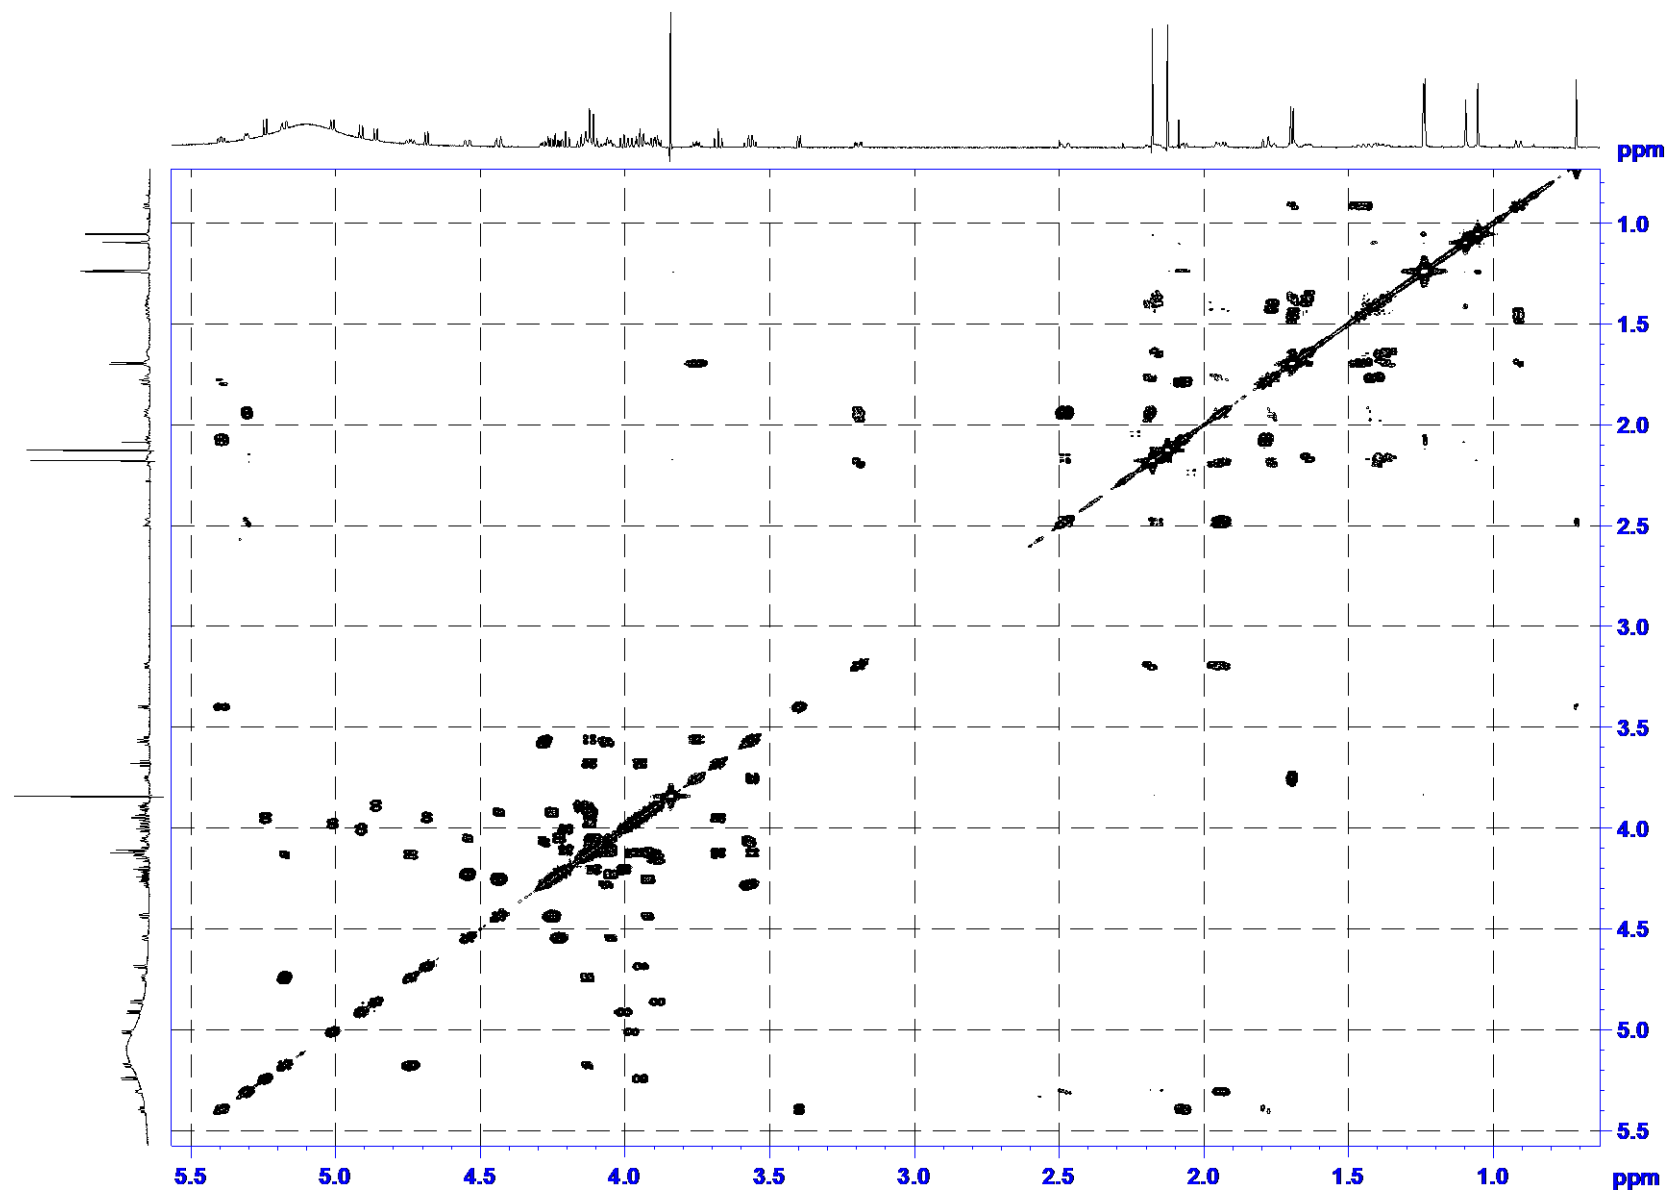

Figure S52. The COSY (700.00 MHz) spectrum of kuriloside A (7) in  $C_5D_5N/D_2O$  (4/1)



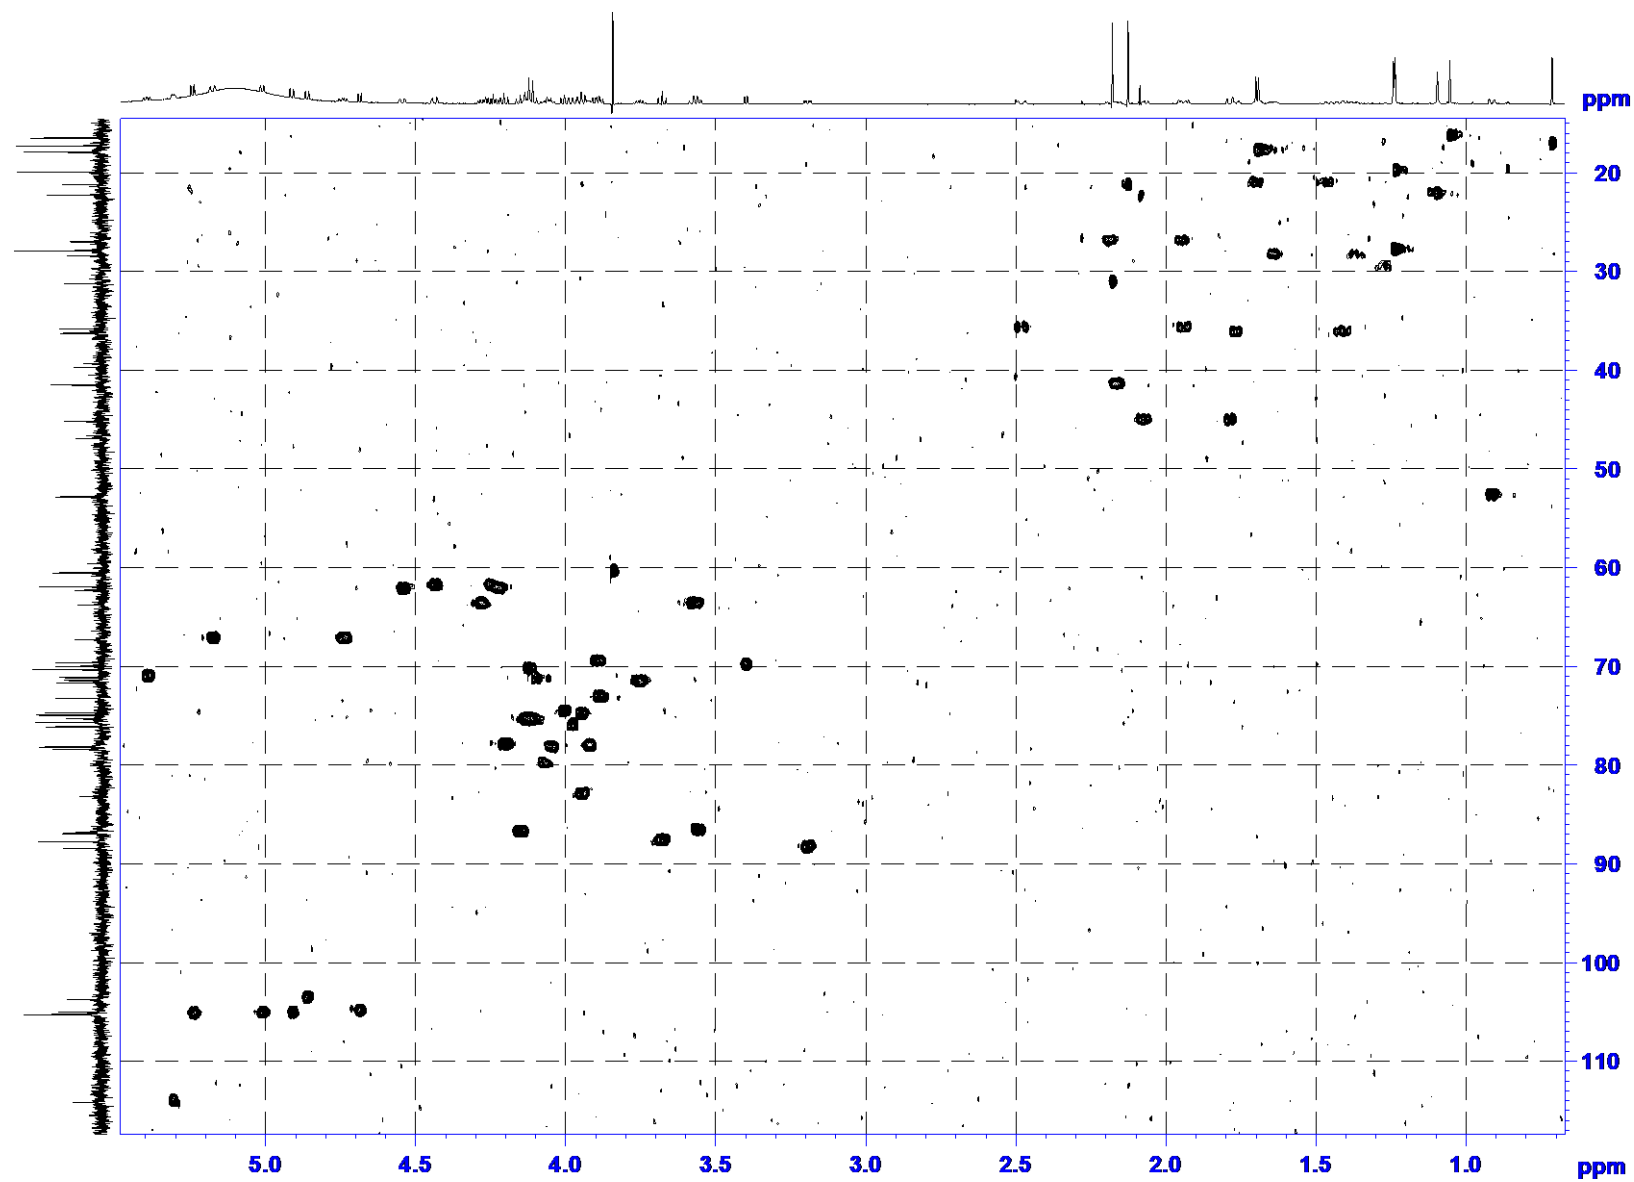

Figure S53. The HSQC (700.00 MHz) spectrum of kuriloside A (7) in  $\text{C}_5\text{D}_5\text{N}/\text{D}_2\text{O}$  (4/1)

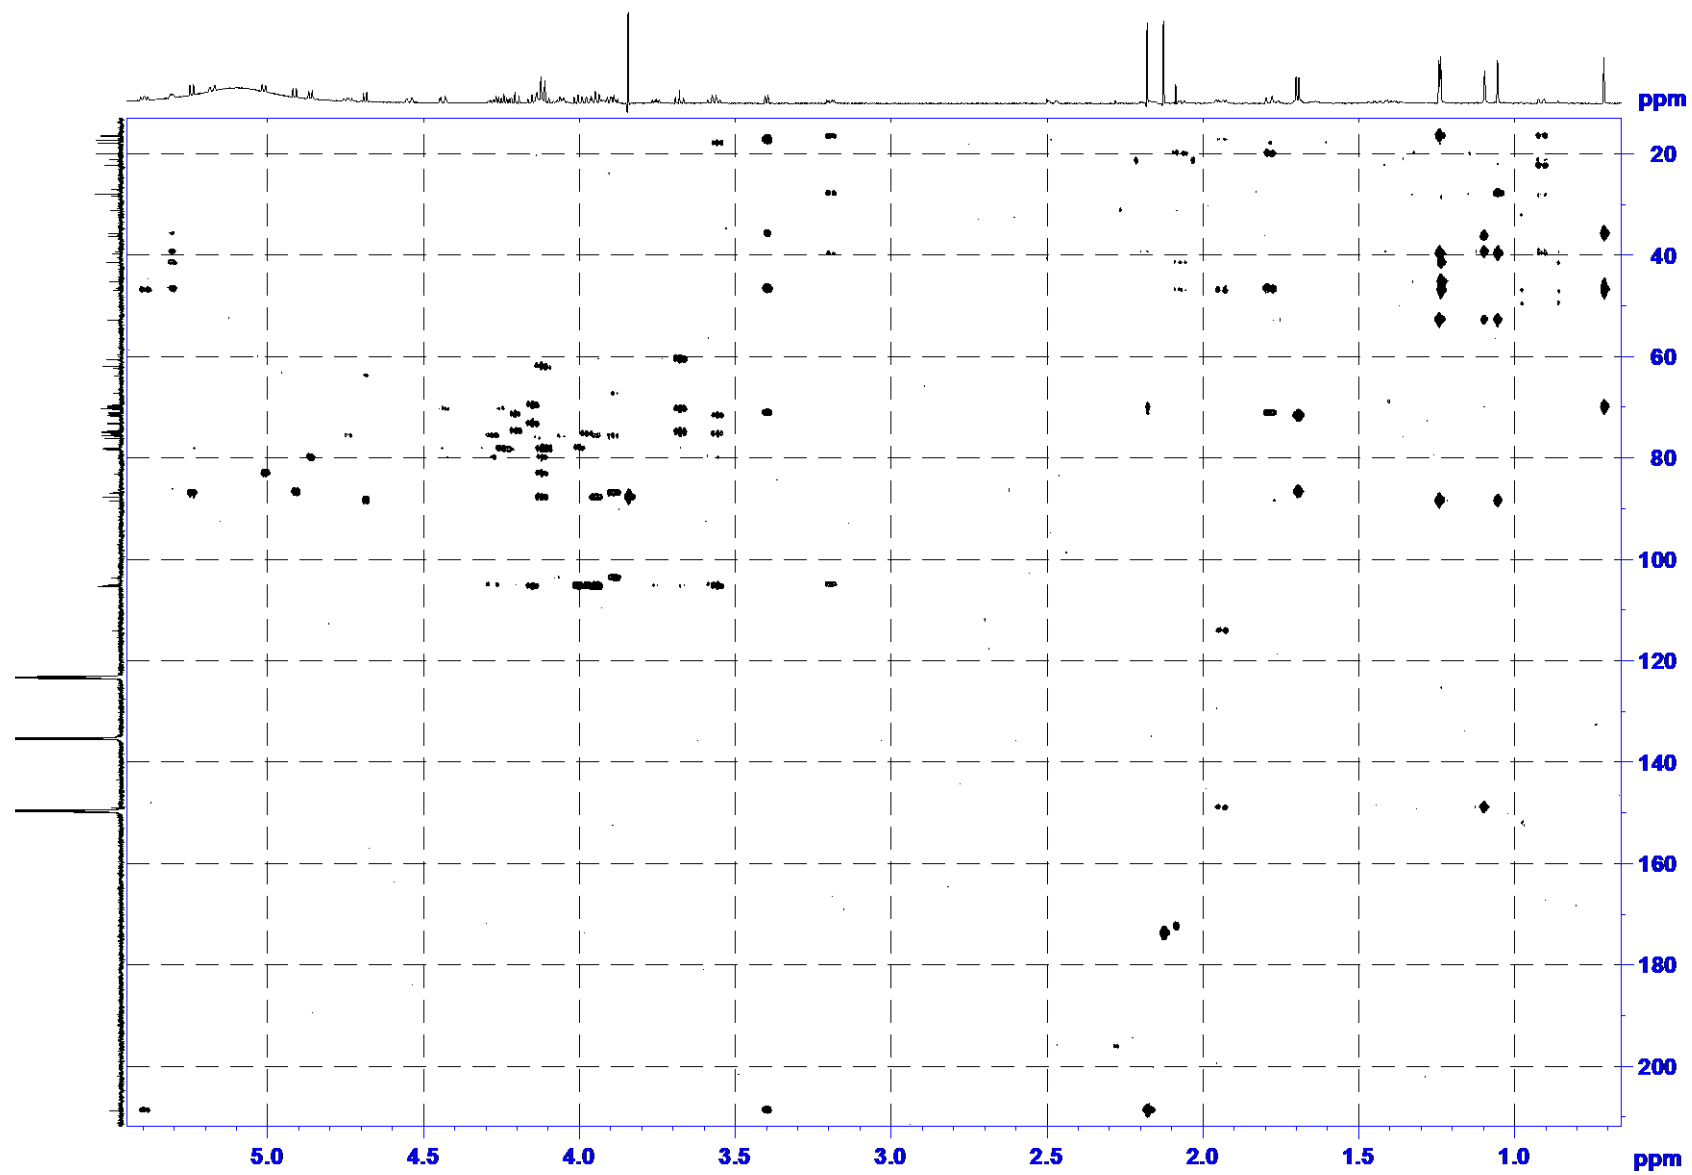

Figure S54. The HMBC (700.00 MHz) spectrum of kuriloside A (7) in  $\text{C}_5\text{D}_5\text{N}/\text{D}_2\text{O}$  (4/1)

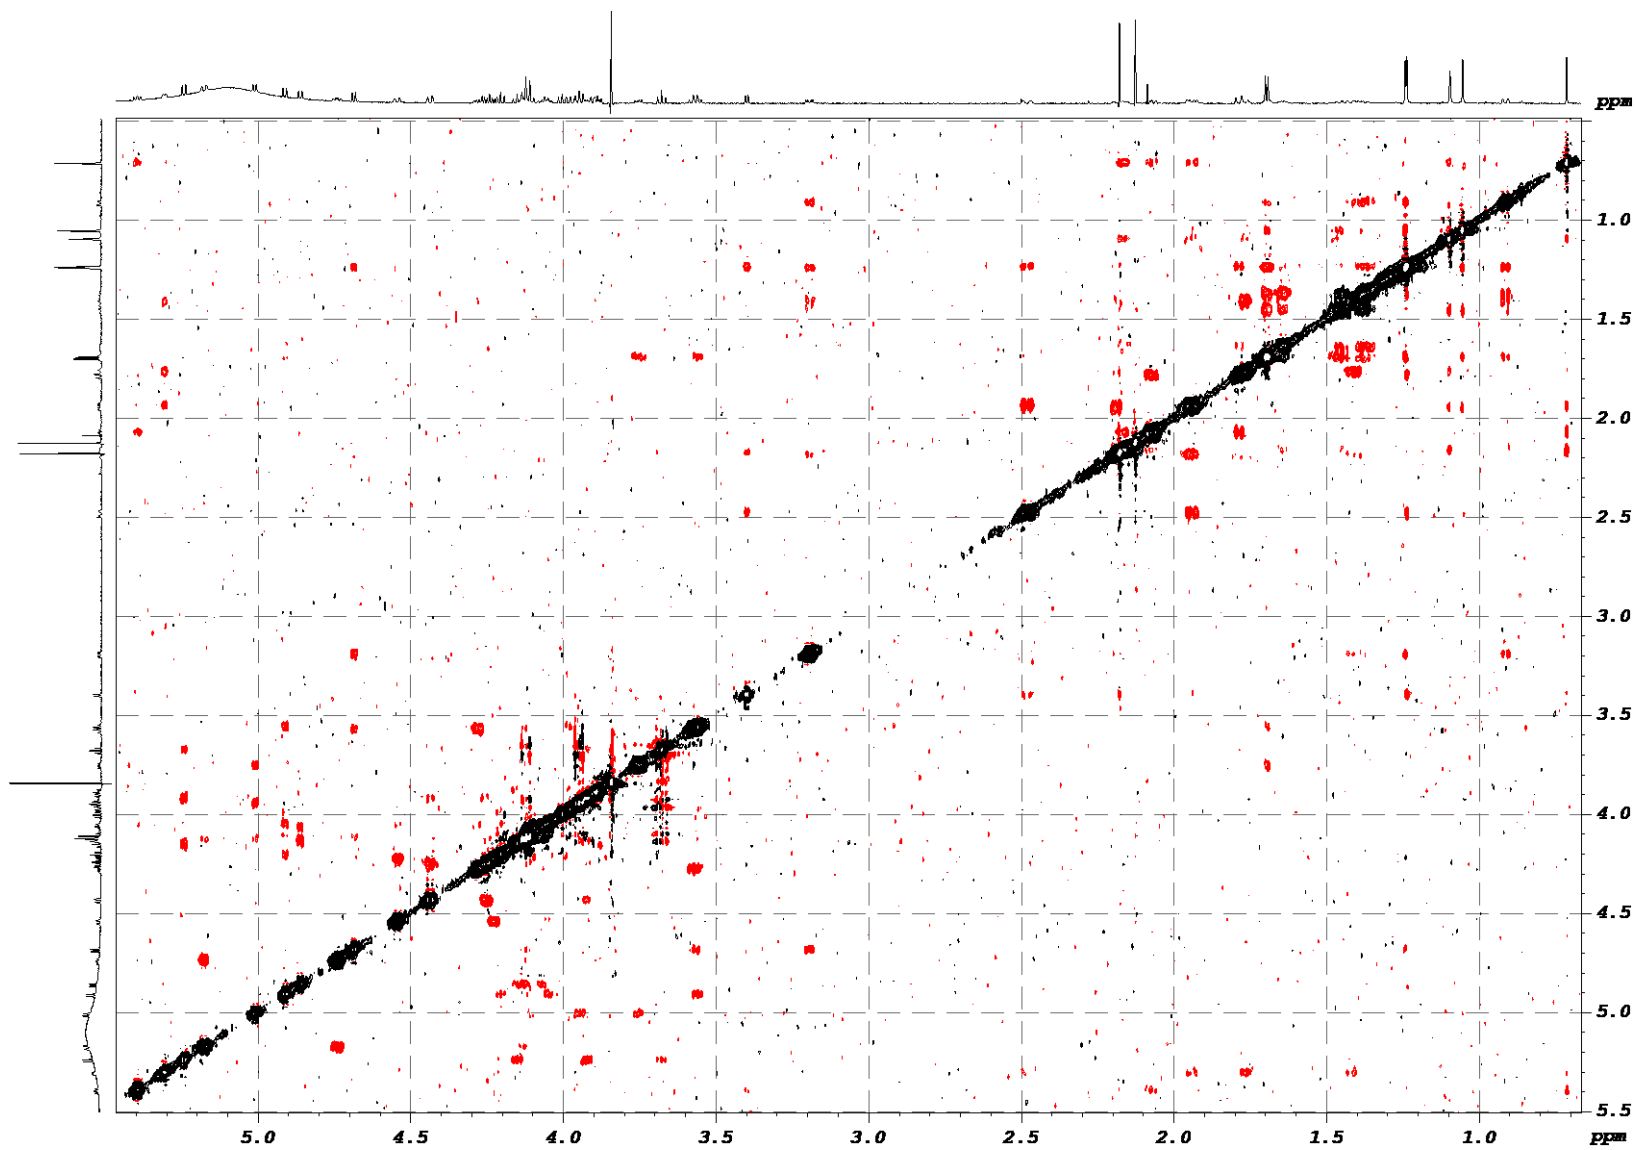

Figure S55. The ROESY (700.00 MHz) spectrum of kuriloside A (7) in C<sub>5</sub>D<sub>5</sub>N/D<sub>2</sub>O (4/1)

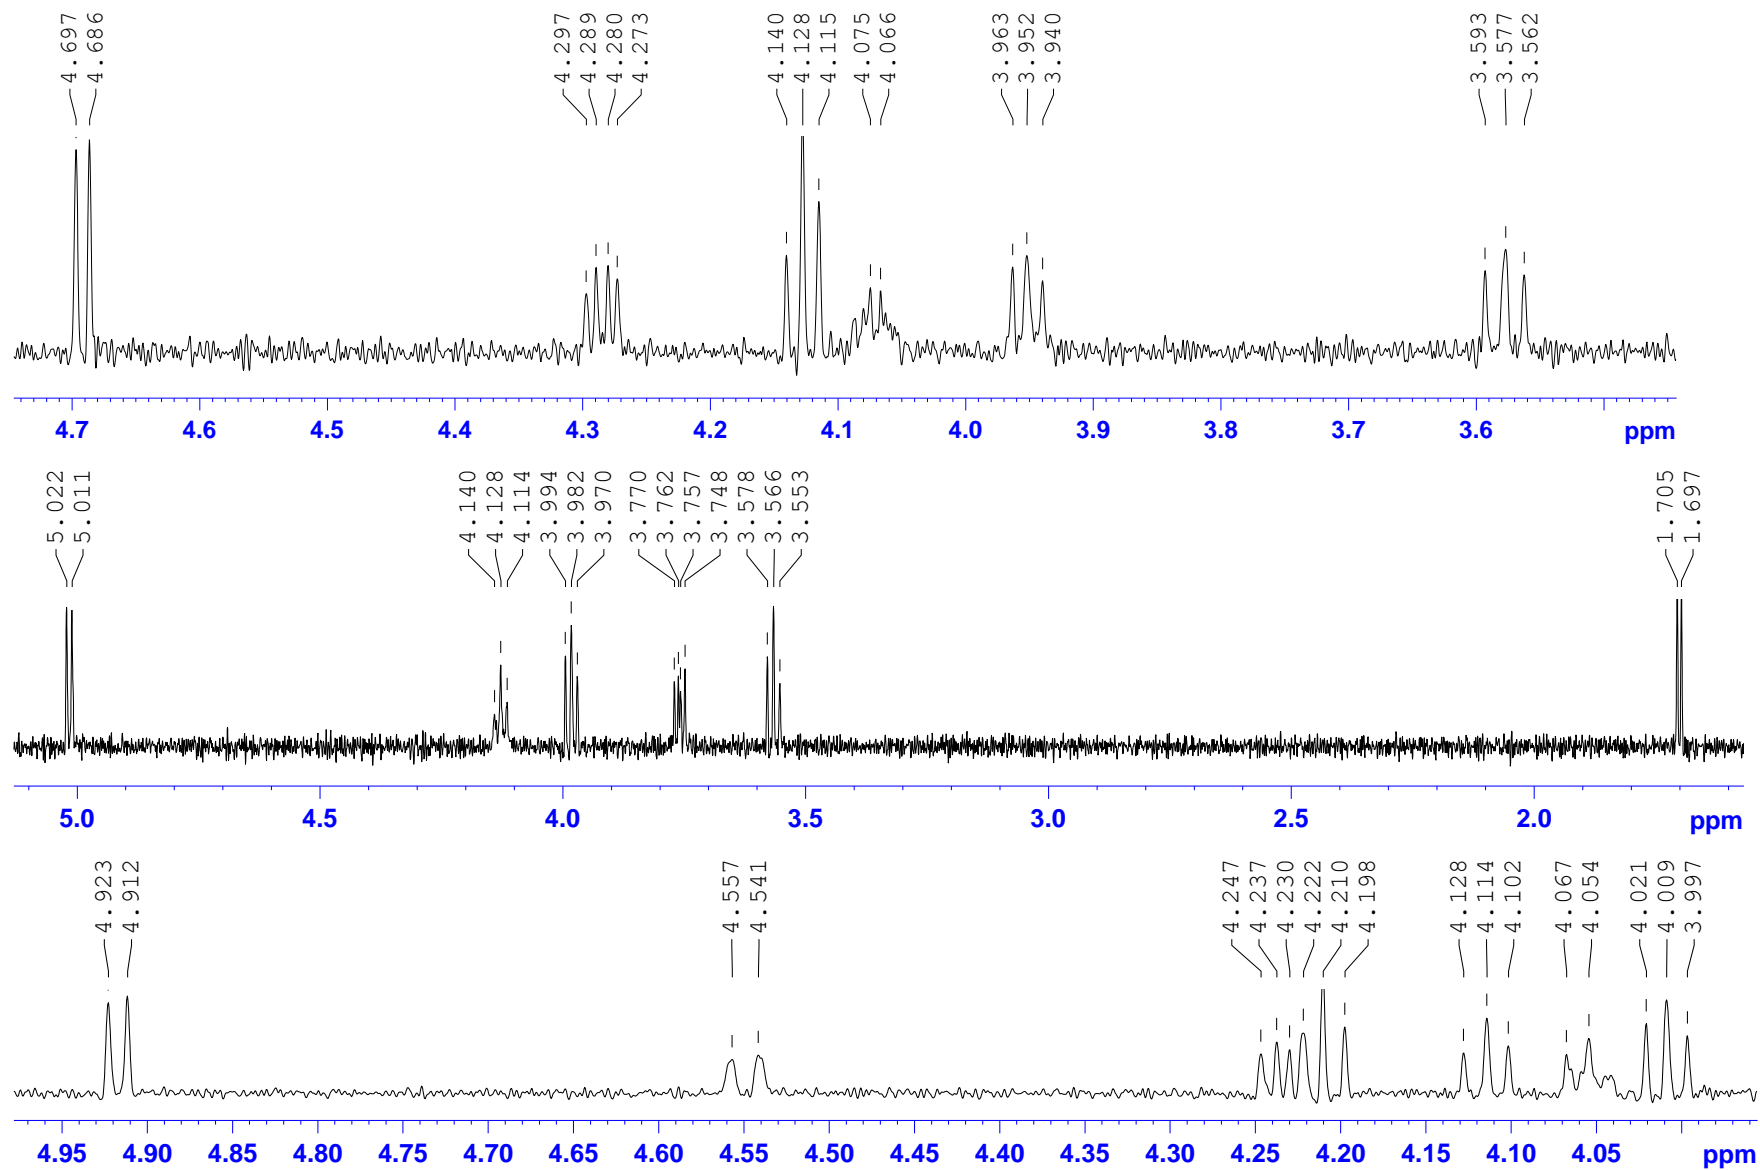

Figure S56. 1 D TOCSY (700.00 MHz) spectra of kuriloside A (7) in C<sub>5</sub>D<sub>5</sub>N/D<sub>2</sub>O (4/1)

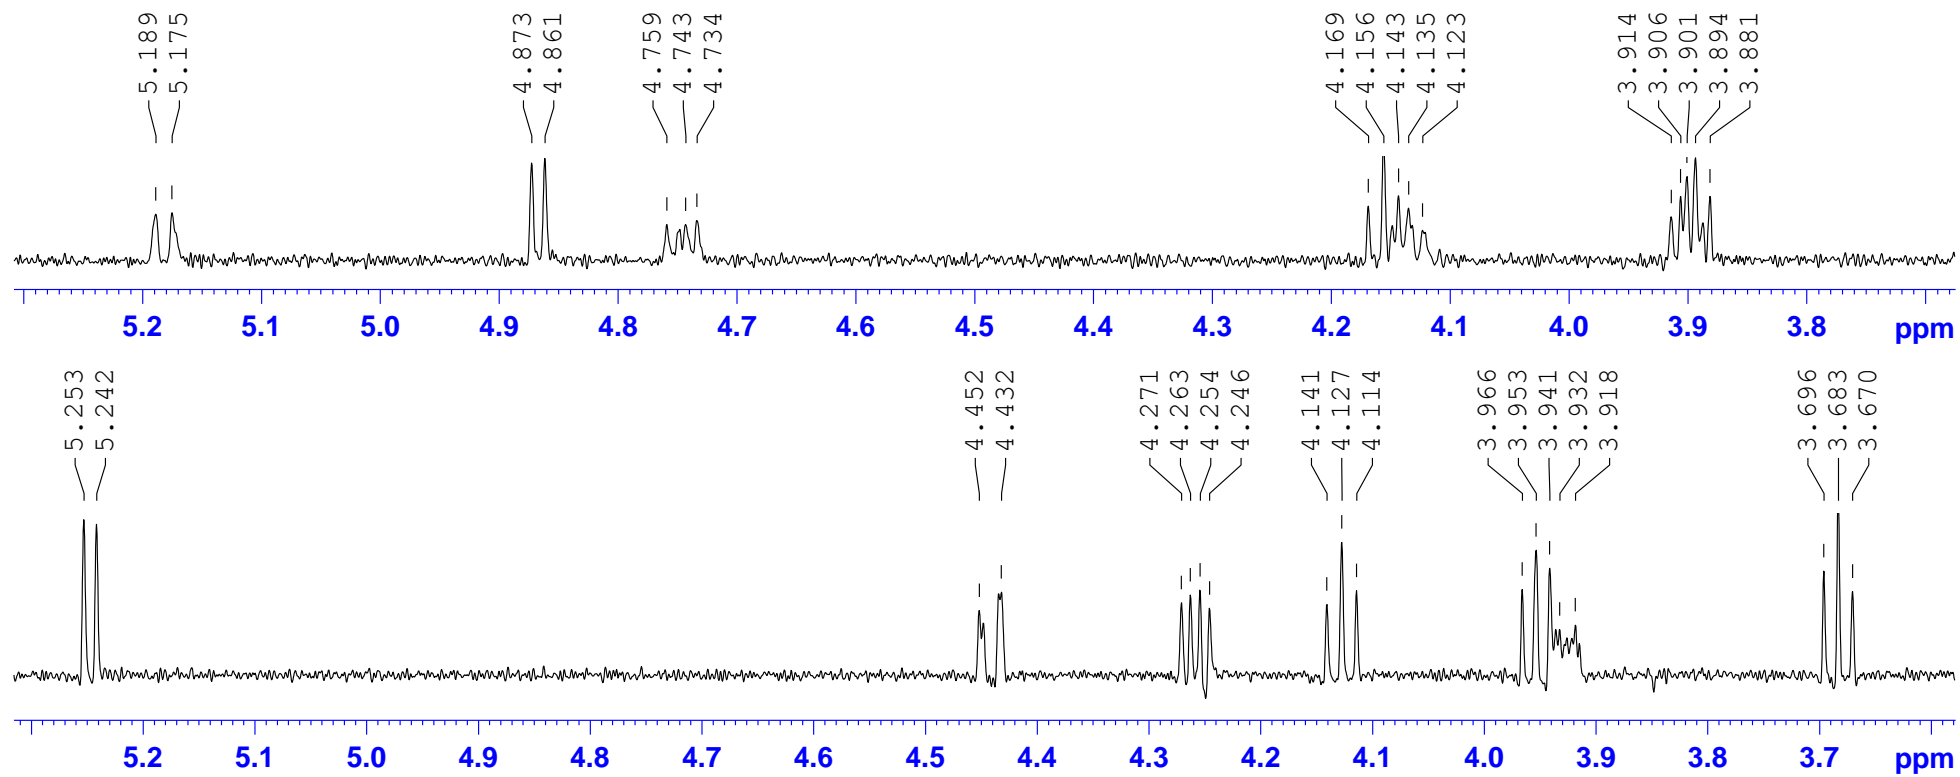

Figure S57. 1 D TOCSY (700.00 MHz) spectra of kuriloside A (7) in C<sub>5</sub>D<sub>5</sub>N/D<sub>2</sub>O (4/1)

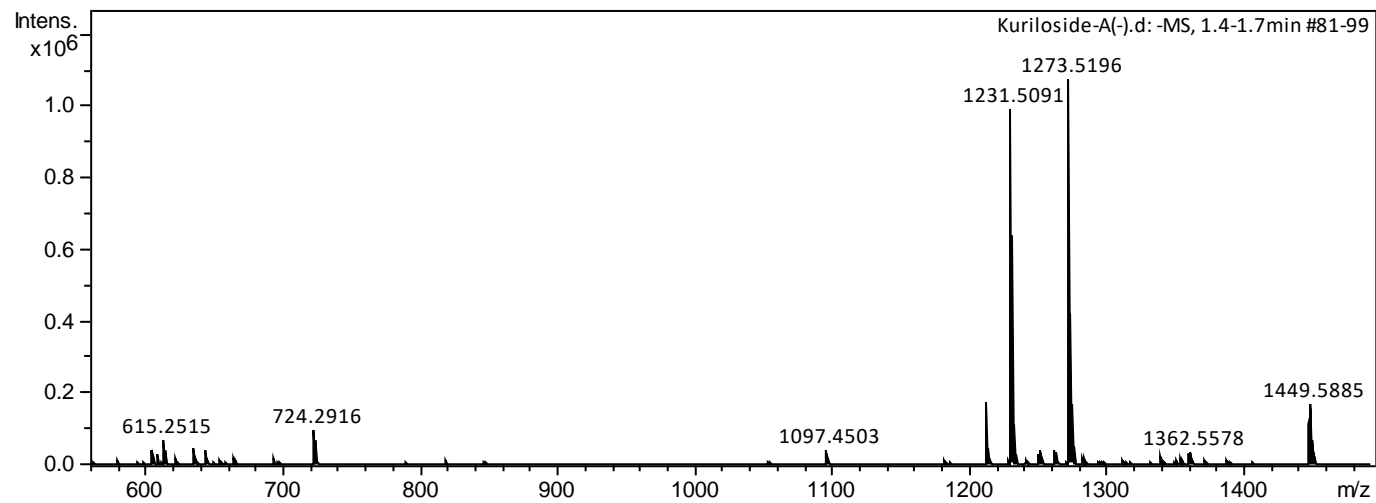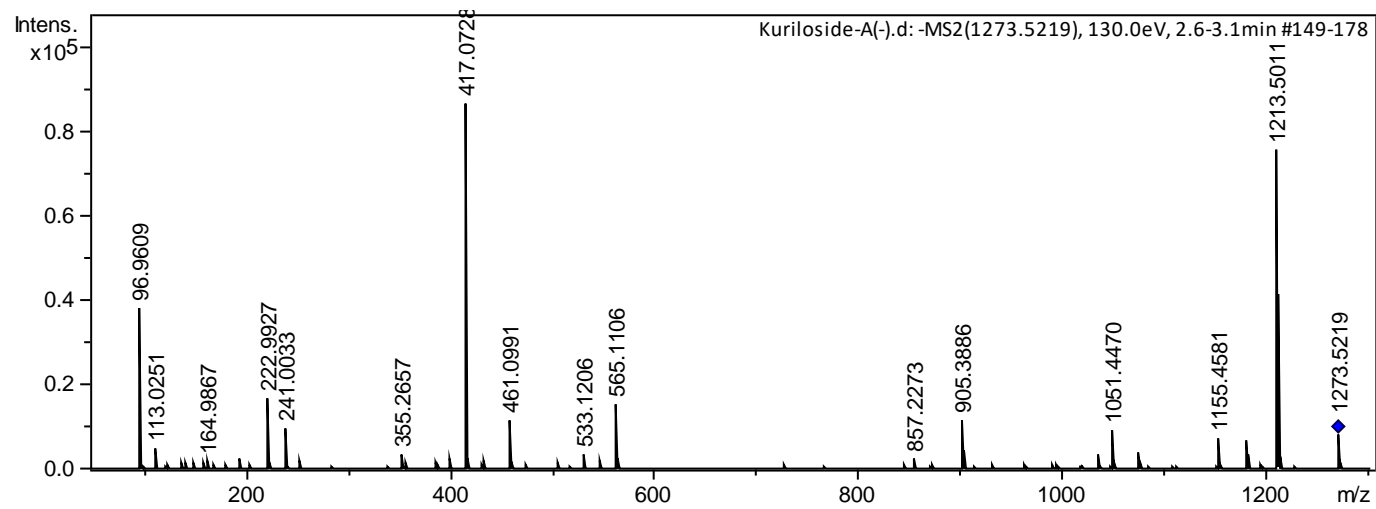

Figure S58. HR-ESI-MS and ESI-MS/MS spectra of kuriloside A (7)
